# Supplementary material for: The Evolutionary Impact of Childhood Cancer on the Human Gene Pool
Source: Research Square preprint supplement (doi:10.21203/rs.3.rs-2658025/v1), 2023-03-10
Supplement: Supplementary file 1 [file e78896a17c93b47e4db03150.xlsx]

## Sheet: References
References to materials used for this work
Sheet name in this spreadsheet (links to sheet)	Reference for this work	PMID	Further info	Subdata accessed	Accessed	OA_full_text_link	PUBMED_link
References	Supplementary data 1	N/A	this sheet	N/A	N/A	N/A	N/A
Meta_data	Supplementary data 2	N/A	combined metrics from pancancer studies	N/A	N/A	N/A	N/A
Byrjalsen_pCPS_genes_2021	Supplementary data 3	34061292	Supplementary file2 (XLSX 96 kb) 10689_2021_254_MOESM2_ESM.xlsx (96K)	Category 1 - Individual genes & Category 2 - Group genes (in bold)	2022-06-20	https://www.ncbi.nlm.nih.gov/pmc/articles/PMC8484084/	link to PUBMED
CPS_gene_groups	Supplementary data 4	N/A	generated based on info in Supplementary data 3 (Byrjalsen_pCPS_genes_2021). See methods.	N/A	N/A	N/A	N/A
Zhang_2015	Supplementary data 5	26580448	Supplement2. NIHMS748306-supplement-Supplement2.xlsx (840K)	TableS4x	2022-06-20	https://www.ncbi.nlm.nih.gov/pmc/articles/PMC4734119/	link to PUBMED
Parsons_2016	Supplementary data 6	26822237	eTables 1 to 11. NIHMS864439-supplement-eTables_1_to_11.xlsx (115K)	eTable 9	2022-06-20	https://www.ncbi.nlm.nih.gov/pmc/articles/PMC5471125/	link to PUBMED
Mody_2016	Supplementary data 7	26325560	NIHMS757834-supplement-Combined_Supplement.pdf (15M)	eTable 1	2022-06-20	https://www.ncbi.nlm.nih.gov/pmc/articles/PMC4758114/	link to PUBMED
Oberg_2016	Supplementary data 8	28007021	Table 4	Table 4	2022-06-20	https://www.ncbi.nlm.nih.gov/pmc/articles/PMC5180407/	link to PUBMED
Grobner_2018	Supplementary data 9	29489754	Supplementary Tables 1-24. (XLSX 1018 kb)	S_Table7	2022-06-20	https://www.nature.com/articles/nature25480	link to PUBMED
Wong_2020	Supplementary data 10	33020650	Supplementary Tables 1, 3 and 5.	ST1-GERMLINE SNV	2022-06-20	not OA: https://www.nature.com/articles/s41591-020-1072-4	link to PUBMED
Byrjalsen_2020	Supplementary data 11	33332384	S1 Data (XLSX)	Table 5 & VUS	2022-06-20	https://www.ncbi.nlm.nih.gov/pmc/articles/PMC7787686/	link to PUBMED
Fiala_2021	Supplementary data 12	34308366	Supplementary Tables 1–4.	Supp Table 1 (positive only)	2022-06-20	https://www.nature.com/articles/s43018-021-00172-1	link to PUBMED
Newmann_2021	Supplementary data 13	34301788	NIHMS1728529-supplement-1.xlsx (646K)	S8. Germline P&LP	2022-06-20	https://cancerdiscovery.aacrjournals.org/content/11/12/3008.long	link to PUBMED
Stedingk_2021	Supplementary data 14	33674644	41598_2021_84502_MOESM2_ESM.xlsx (731K)	S3 (Likely) Pathogenic Variants	2022-06-20	https://www.ncbi.nlm.nih.gov/pmc/articles/PMC7935871/	link to PUBMED
Wagener_2021	Supplementary data 15	33840814	41431_2021_878_MOESM2_ESM.xlsx (299K)	Table S3	2022-06-20	https://www.ncbi.nlm.nih.gov/pmc/articles/PMC8385053/	link to PUBMED
Zhang_2015_genes	Supplementary data 16	26580448	Supplement2.NIHMS748306-supplement-Supplement2.xlsx (840K)	TableS2	2022-06-20	https://www.ncbi.nlm.nih.gov/pmc/articles/PMC4734119/	link to PUBMED
Parsons_2016_genes	Supplementary data 17	26822237	eTables 1 to 11. NIHMS864439-supplement-eTables_1_to_11.xlsx (115K)	eTable 2	2022-06-20	https://www.ncbi.nlm.nih.gov/pmc/articles/PMC5471125/	link to PUBMED
Mody_2016_genes	Supplementary data 18	26325560	panel not reported	N/A	2022-06-20	https://www.ncbi.nlm.nih.gov/pmc/articles/PMC4758114/	link to PUBMED
Oberg_2016_genes	Supplementary data 19	28007021	panel not reported	N/A	2022-06-20	https://www.ncbi.nlm.nih.gov/pmc/articles/PMC5180407/	link to PUBMED
Grobner_2018_genes	Supplementary data 20	29489754	Supplementary Tables 1-24. (XLSX 1018 kb)	S_Table6	2022-06-20	https://www.nature.com/articles/nature25480	link to PUBMED
Wong_2020_genes	Supplementary data 21	33020650	Supplementary Tables 1, 3 and 5.	ST5-CPGenes	2022-06-20	not OA: https://www.nature.com/articles/s41591-020-1072-4	link to PUBMED
Byrjalsen_2020_genes	Supplementary data 22	33332384	S1 Data (XLSX)	Gene panel	2022-06-20	https://www.ncbi.nlm.nih.gov/pmc/articles/PMC7787686/	link to PUBMED
Fiala_2021_genes	Supplementary data 23	34308366	Supplementary Tables 1–4.	Supp Table 2	2022-06-20	https://www.nature.com/articles/s43018-021-00172-1	link to PUBMED
Newmann_2021_genes	Supplementary data 24	34301788	NIHMS1728529-supplement-1.xlsx (646K)	S7. Cancer_Predisposition_Genes	2022-06-20	https://cancerdiscovery.aacrjournals.org/content/11/12/3008.long	link to PUBMED
Stedingk_2021_genes	Supplementary data 25	33674644	41598_2021_84502_MOESM1_ESM.xlsx (127K)	Target Summary	2022-06-20	https://www.ncbi.nlm.nih.gov/pmc/articles/PMC7935871/	link to PUBMED
Wagener_2021_genes	Supplementary data 26	33840814	41431_2021_878_MOESM2_ESM.xlsx (299K)	Table S2	2022-06-20	https://www.ncbi.nlm.nih.gov/pmc/articles/PMC8385053/	link to PUBMED
ELP1_gnomad_LoFs	Supplementary data 27	N/A	gnomad v2.1.1	ELP1 pLoF	2022-06-20	https://gnomad.broadinstitute.org/gene/ENSG00000070061?dataset=gnomad_r2_1	N/A
ELP1_Waszak_2020	Supplementary data 28	31609649	Source Data Fig. 1	sheet: fig. 1b	2022-06-20	https://www.ncbi.nlm.nih.gov/pmc/articles/PMC7430762/	link to PUBMED
GPR161_gnomad_pLoF	Supplementary data 29	N/A	gnomad v2.1.1	GPR161 pLoF	2022-06-20	https://gnomad.broadinstitute.org/gene/ENSG00000143147?dataset=gnomad_r2_1	N/A
GPR161_Begemann_2020	Supplementary data 30	31609649	Data supplement 1	Table 1	2022-06-20	https://www.ncbi.nlm.nih.gov/pmc/articles/PMC6943973/	link to PUBMED
SAMD9_clinvar_P_or_LP	Supplementary data 31	N/A	National Center for Biotechnology Information. ClinVar.	SAMD9 [gene] "single nucleotide" & "Pathogenic"	2022-06-20	https://www.ncbi.nlm.nih.gov/clinvar/?gr=1	N/A
SAMD9L_clinvar_P	Supplementary data 32	N/A	National Center for Biotechnology Information. ClinVar.	SAMD9L [gene] "single nucleotide" & "Pathogenic"	2022-06-20	https://www.ncbi.nlm.nih.gov/clinvar/?gr=1	N/A
HRAS_clinvar_P	Supplementary data 33	N/A	National Center for Biotechnology Information. ClinVar.	HRAS [gene] "single nucleotide" & "Pathogenic"	2022-06-20	https://www.ncbi.nlm.nih.gov/clinvar/?gr=2	N/A
MSH2_gnomad_LoFs	Supplementary data 34	N/A	gnomad v2.1.1	MSH2 pLoF	2022-06-20	https://gnomad.broadinstitute.org/gene/ENSG00000095002?dataset=gnomad_r2_1	N/A
DIS3L2_gnomad_LoFs	Supplementary data 35	N/A	gnomad v2.1.1	DIS3L2 pLoF	2022-06-20	https://gnomad.broadinstitute.org/gene/ENSG00000144535?dataset=gnomad_r2_1	N/A
Sud_2017_plus_ped_hits	Supplementary data 36	29026206	Supplementary Table 1	Supplementary Table 1	2022-06-20	10.1038/nrc.2017.82	link to PUBMED

## Sheet: Meta_data
Author (journal)	Year	cohort_n	CPS_carrier_n	CPS_carrier_rate	WGS	WES	Panel	genes_analyzed	Number of genes	Link
Zhang, J (NEJM)	2015	1120	95	8,48%	664	456	0	565	565 genes,men rapporterer kun 60 genes that have been associated with autosomal dominant cancer-predisposition syndromes og 29 autosomal recessive cancer-predisposition genes	https://www.nejm.org/doi/full/10.1056/nejmoa1508054
Parsons, DW (JAMA Onc)	2016	150	13	8,67%	0	150	0	not reported		https://www.ncbi.nlm.nih.gov/pmc/articles/pmid/26822237/
Mody, RJ (JAMA)	2016	102	11	10,78%	0	91	0	not reported	Uklart	https://www.ncbi.nlm.nih.gov/pmc/articles/PMC4758114/
Oberg, JA (Genome Med)	2016	101	18	17,82%	0	90	0	not reported	?	https://www.ncbi.nlm.nih.gov/pmc/articles/PMC5180407/
Gröbner, SN (Nature)	2018	914	69	7,55%	542	372	0	162	162 genes	https://www.nature.com/articles/nature25480
Wong, N (Nature Med)	2020	247	40	16,19%	247	0	0	not reported	161	https://www-nature-com.ep.fjernadgang.kb.dk/articles/s41591-020-1072-4#MOESM3
Byrjaldsen, A (PLoS Gen)	2020	198	29	14,65%	197	0	0	314	314 cancer genes +	https://www.ncbi.nlm.nih.gov/pmc/articles/PMC7787686/
Fiala, EM (Nature Can.)	2021	751	138	18,38%	0	0	751	88	468, men germline kun i 88	https://www.nature.com/articles/s43018-021-00172-1
Newmann, S (Cancer Discovery)	2021	300	55	18,33%	300	0	0	156	156 cancer predisposition genes	https://cancerdiscovery.aacrjournals.org/content/11/12/3008.long
Stedingk, KV (Sci rep)	2021	790	30	3,80%	0	0	790	60	22
Wagener, R (EJHG)	2021	160	11	6,88%	0	160	0	295	295 cancer related genes	https://www.nature.com/articles/s41431-021-00878-x#Sec2
11		4833	509	10,53%	1950	1319	1541

## Sheet: Byrjalsen_pCPS_genes_2021
gene	Associated phenotype	Inheritance	Number of patients with childhood cancer	Additional evidence	References	Present in Radboudumc gene panel?	Present in STAGING gene panel?	Identified through literature search	ADDED: non_cancer_phenotype	ADDED: best de novo rate estimate [AD only]	ADDED: de novo rate group	ADDED: Best pediatric cancer penetrance estimate	ADDED: Penetrance group	approx_de_novo_from_PMID_35820085
ABCB11	Familial intrahepatic cholestasis	AR	>5	Yes	336-338	N	Y		Severe
AIP	Pituitary adenoma predisposition	AD	>5	Yes	104-111	Y	Y		Moderate		Low		Low
ALK	Neuroblastoma, susceptibility to, 3	AD	>5	Yes	80, 112-118	Y	Y		None		Unknown	0.57	Very high
APC	Familial Adenomatous Polyposis	AD	>5	Yes	80, 119-124	Y	Y		None	0.25	Very high		High	0.2
ATM	Ataxia-telangiectasia / susceptibility to breast cancer	AR	>5	Yes	126-130	Y	Y		Severe
BAP1	BAP1 tumor predisposition syndrome	AD	>5	Yes	131-136	Y	Y		None		Unknown		Unknown
BLM	Bloom syndrome	AR	>5	Yes	137-141	Y	Y		Moderate
CD27	Lymphoproliferative syndrome 2	AR	>5	Yes	326327	N	N	X	Moderate
CD70	Lymphoproliferative syndrome 3	AR	5	Yes	328-330	N	N	X	Moderate
CDC73	Hyperparathyroidism-jaw tumor syndrome	AD	>5	Yes	163-166	Y	Y		Moderate		Unknown		High
CDH1	Familial diffuse gastric cancer with or without cleft lip and/or palate	AD	>5	Yes	167-171, 278	Y	Y		None		Very low		Very low
CDKN1C	Beckwith-Wiedemann syndrome; IMAGE syndrome	AD	>5	Yes	174-177	Y	Y		Moderate		Low		Low
CDKN2A	Familial atypical multiple mole melanoma-pancreatic carcinoma syndrome (FAMMPC)	AD	>5	Yes	178-183, 280	Y	Y		None		Unknown		Unknown
CEBPA	Acute myeloid leukemia	AD	>5	Yes	184-187	Y	Y		None		Low		Unknown
CREBBP	Rubinstein-Taybi syndrome	AD	>5	Yes	192-194, 281-283	Y	Y		Severe		Very high		Low
CTR9	Wilms tumor predisposition	AD	>5	Yes	196, 197	Y	Y		None		Unknown	0.6	Very high
CTLA4	Autoimmune lymphoproliferative syndrome, type V	AD	>5	Yes	312313314	N	N	X	Moderate		Unknown		Unknown
DICER1	DICER1 tumor predisposition syndrome	AD	>5	Yes	198-203	Y	Y		None	0.2	Very high		High	0.2
DIS3L2	Perlman syndrome	AR	>5	Yes	204-206	Y	Y		Moderate
IKBKAP	Medulloblastoma	AD	>5	Yes	376	N	N	X	None		Very low		Unknown
ETV6	Thrombocytopenia 5	AD	>5	Yes	216-220	Y	Y		Discrete		Unknown		High
EZH2	Weaver syndrome	AD	>5	Yes	189, 221, 222, 284, 285	Y	Y		Moderate	0.95	Very high	0.07	High
FAS	Autoimmune lymphoproliferative syndrome, type IA	AD	5	Yes	237, 238, 362	Y	Y		Discrete		Low		Low
FBXW7	Wilms tumor predisposition?	AD	5	Yes	320, 363-364	N	Y		None		Unknown		Unknown
GATA2	Emberger syndrome / immunodeficiency 21 / AML, susceptibility to	AD	>5	Yes	246- 250	Y	Y		Discrete	0.07	High	0.35	Very high	0.6
GPC3	Simpson-Golabi-Behmel syndrome 1	XLR	>5	Yes	251-256	Y	Y		Moderate		Unknown		Unknown
GPR161	Medulloblastoma	AD	>5	Yes	359	Y	Y		None		Unknown		Unknown
HAVCR2	T-cell lymphoma, subcutaneous panniculitis like	AR	>5	Yes	318319	Y	N		None
HRAS	Costello syndrome, epidermal nevus, bladder cancer, head and neck squamous cell carcinoma	AD	>5	Yes	345-349	N	Y		Moderate		Very high	0.15	High
IKZF1	Common variable immunodeficiency 13	AD	>5	Yes	316317	N	Y		Moderate		Unknown		Unknown
ITK	ITK deficiency syndrome	AR	>5	Yes	296297	N	Y		Discrete
LIG4	LIG4 syndrome	AR	>5	Yes	80, 265-268	Y	Y		None
MEN1	Multiple endocrine neoplasia 1	AD	>5	Yes	269-272	Y	Y		Moderate	0.1	High		High	0.1
NBN	Nijmegen Breakage syndrome	AR	>5	Yes	3	Y	Y		Severe
NF1	Neurofibromatosis type 1	AD	>5	Yes	4	Y	Y		Moderate	0.5	Very high		High	0.5
NF2	Neurofibromatosis type 2	AD	>5	Yes	5	Y	Y		Moderate	0.3	Very high		High	0.6
NSD1	Sotos syndrome	AD	>5	Yes	9	Y	Y		Moderate		Very high	0.03	High	0.9
PAX5	Susceptibility to acute lymphoblastic leukemia	AD	>5	Yes	11,12	Y	Y		None		Unknown		Unknown
PHOX2B	Central hypoventilation syndrome, neuroblastoma	AD	>5	Yes	13	Y	Y		Moderate		Unknown		Unknown
PIK3CA	Cowden syndrome 5, wide range of somatic mutations in cancer	AD	5	Yes	14	Y	Y		Moderate		Unknown		Unknown
PTEN	Cowden syndrome 1	AD	>5	Yes	21	Y	Y		Moderate	0.1	High		Very low	0.2
RB1	Retinoblastoma	AD	>5	Yes	28	Y	Y		None	0.5	Very high	0.9	Very high	0.5
RECQL4	Baller-Gerold syndrome / RAPADILINO syndrome / Rothmund-Thomson syndrome	AR	>5	Yes	29, 360	Y	Y		Moderate
REST	Wilms tumor	AD	>5	Yes	30,31	Y	Y		None		Unknown		Unknown
RET	MEN2A, MEN2B	AD	>5	Yes	32,47	Y	Y		Moderate	0.25	Very high		Very high	0.2
RMRP	Cartilage-hair hypoplasia	AR	>5	Yes	96-99		Y		Severe
RUNX1	Acute myeloid leukemia	AD	>5	Yes	40,41	Y	Y		None		Unknown		Unknown
SAMD9	Mirage syndrome; tumoral calcinosis (AR)	AD	>5	Yes	42,44,45	Y	Y		None		Unknown		Unknown
SAMD9L	Ataxia-pancytopenia syndrome	AD	>5	Yes	43,44	Y	Y		None		Unknown		Unknown
SBDS	Shwachman-Diamond syndrome	AR	>5	Yes	46	Y	Y		Severe
SETBP1	Schinzel-Giedion syndrome	AD	5	Yes	353	N	Y		Severe		Very high		Very low
SH2D1A	Lymphoproliferative syndrome, X-linked, 1	XLR	>5	Yes	304305	N	Y		Discrete		Unknown		Unknown
SMARCA4	RTPS2 / Coffin Siris syndrome 4	AD	>5	Yes	59-62	Y	Y		None		Unknown		Very high
SMARCB1	RTPS1 / Coffin Siris syndrome / schwannomatosis	AD	>5	Yes	63	Y	Y		None		Very high		Very high	0.2
SMARCE1	Coffin Siris syndrome 5 / meningioma (susceptibility to)	AD	>5	Yes	64-67	Y	Y		None		Very high		Unknown
STK11	Peutz-Jeghers syndrome	AD	>5	Yes	74-77	Y	Y		Discrete		High	0.09	High	0.8
TP53	Li Fraumeni syndrome	AD	>5	Yes	80	Y	Y		None	0.2	Very High	0.3	Very High	0.2
TRIM28	Wilms tumor predisposition	AD	>5	Yes	31,95	N	Y		None		Unknown		Unknown	0.6
TRIM37	Mulibrey nanism	AR	>5	Yes	288-290	N	Y		None
TSC1	Tuberous sclerosis I	AD	2	Yes	82	Y	Y		Moderate	0.66	Very high	0.1	High	0.6
TSC2	Tuberous sclerosis II	AD	>5	Yes	82-84	Y	Y		Moderate	0.66	Very high	0.1	High
USB1	Poikiloderma with neutropenia	AR	>5	Yes	85-88	Y	Y		Moderate
WAS	Wiskott-Aldrich syndrome	XLR	>5	Yes	89-93	Y	Y		Moderate		Unknown		Unknown
WT1	Wilms tumor 1	AD	>5	Yes	94	Y	Y		Discrete		Very high	0.7	Very high	0.7
BRCA2		AR							Moderate
FANCA		AR							Moderate
PALB2		AR							Moderate
PTCH1		AD							Moderate	0.25	Very high		High	0.2
SUFU		AD							Moderate	0.25	Very high		Very High	0.2
MLH1		AR							None
MSH2		AR							None
MSH6		AR							None
PMS2		AR							None
BUB1B		AR							Severe
TRIP13		AD							None		Unknown		Unknown
BRAF		AD							Moderate	0.25	Very high		High
CBL		AD							Moderate		Unknown	0.07	High
PTPN11		AD							Moderate	0.25	Very high		High	0.6
RIT1		AD							Moderate	0.25	Very high		High
FH		AD							Discrete		Low		Low
SDHA		AD							Discrete		Very low		Low
SDHB		AD							Discrete		Very low		Low
SDHC		AD							Discrete		Very low		Low
SDHD		AD							Discrete		Very low		Low
VHL		AD							Discrete	0.2	Very high		Low	0.4

## Sheet: CPS_gene_groups
group_short	group_long	risk_association	gene
pCPS	pediatric-onset_cancer_predispostion_syndrome	monoallelic	SMARCA4
pCPS	pediatric-onset_cancer_predispostion_syndrome	monoallelic	CREBBP
pCPS	pediatric-onset_cancer_predispostion_syndrome	monoallelic	TSC2
pCPS	pediatric-onset_cancer_predispostion_syndrome	monoallelic	PTCH1
pCPS	pediatric-onset_cancer_predispostion_syndrome	monoallelic	TRIM28
pCPS	pediatric-onset_cancer_predispostion_syndrome	monoallelic	NF2
pCPS	pediatric-onset_cancer_predispostion_syndrome	monoallelic	NSD1
pCPS	pediatric-onset_cancer_predispostion_syndrome	monoallelic	SETBP1
pCPS	pediatric-onset_cancer_predispostion_syndrome	monoallelic	SUFU
pCPS	pediatric-onset_cancer_predispostion_syndrome	monoallelic	PIK3CA
pCPS	pediatric-onset_cancer_predispostion_syndrome	monoallelic	TSC1
pCPS	pediatric-onset_cancer_predispostion_syndrome	monoallelic	RET
pCPS	pediatric-onset_cancer_predispostion_syndrome	monoallelic	RB1
pCPS	pediatric-onset_cancer_predispostion_syndrome	monoallelic	CTR9
pCPS	pediatric-onset_cancer_predispostion_syndrome	monoallelic	PTPN11
pCPS	pediatric-onset_cancer_predispostion_syndrome	monoallelic	EZH2
pCPS	pediatric-onset_cancer_predispostion_syndrome	monoallelic	WAS
pCPS	pediatric-onset_cancer_predispostion_syndrome	monoallelic	IKZF1
pCPS	pediatric-onset_cancer_predispostion_syndrome	monoallelic	APC
pCPS	pediatric-onset_cancer_predispostion_syndrome	monoallelic	GPC3
pCPS	pediatric-onset_cancer_predispostion_syndrome	monoallelic	PAX5
pCPS	pediatric-onset_cancer_predispostion_syndrome	monoallelic	DICER1
pCPS	pediatric-onset_cancer_predispostion_syndrome	monoallelic	MEN1
pCPS	pediatric-onset_cancer_predispostion_syndrome	monoallelic	CDC73
pCPS	pediatric-onset_cancer_predispostion_syndrome	monoallelic	SMARCE1
pCPS	pediatric-onset_cancer_predispostion_syndrome	monoallelic	BRAF
pCPS	pediatric-onset_cancer_predispostion_syndrome	monoallelic	SMARCB1
pCPS	pediatric-onset_cancer_predispostion_syndrome	monoallelic	FBXW7
pCPS	pediatric-onset_cancer_predispostion_syndrome	monoallelic	STK11
pCPS	pediatric-onset_cancer_predispostion_syndrome	monoallelic	WT1
pCPS	pediatric-onset_cancer_predispostion_syndrome	monoallelic	TRIP13
pCPS	pediatric-onset_cancer_predispostion_syndrome	monoallelic	BAP1
pCPS	pediatric-onset_cancer_predispostion_syndrome	monoallelic	REST
pCPS	pediatric-onset_cancer_predispostion_syndrome	monoallelic	NF1
pCPS	pediatric-onset_cancer_predispostion_syndrome	monoallelic	GATA2
pCPS	pediatric-onset_cancer_predispostion_syndrome	monoallelic	ETV6
pCPS	pediatric-onset_cancer_predispostion_syndrome	biallelic	DIS3L2
pCPS	pediatric-onset_cancer_predispostion_syndrome	monoallelic	CTLA4
pCPS	pediatric-onset_cancer_predispostion_syndrome	biallelic	MSH2
pCPS	pediatric-onset_cancer_predispostion_syndrome	monoallelic	PHOX2B
pCPS	pediatric-onset_cancer_predispostion_syndrome	monoallelic	CDH1
pCPS	pediatric-onset_cancer_predispostion_syndrome	monoallelic	RUNX1
pCPS	pediatric-onset_cancer_predispostion_syndrome	monoallelic	FAS
pCPS	pediatric-onset_cancer_predispostion_syndrome	monoallelic	ALK
pCPS	pediatric-onset_cancer_predispostion_syndrome	monoallelic	TP53
pCPS	pediatric-onset_cancer_predispostion_syndrome	biallelic	MSH6
pCPS	pediatric-onset_cancer_predispostion_syndrome	monoallelic	CBL
pCPS	pediatric-onset_cancer_predispostion_syndrome	monoallelic	PTEN
pCPS	pediatric-onset_cancer_predispostion_syndrome	monoallelic	AIP
pCPS	pediatric-onset_cancer_predispostion_syndrome	monoallelic	CDKN1C
pCPS	pediatric-onset_cancer_predispostion_syndrome	monoallelic	FH
pCPS	pediatric-onset_cancer_predispostion_syndrome	biallelic	MLH1
pCPS	pediatric-onset_cancer_predispostion_syndrome	biallelic	BUB1B
pCPS	pediatric-onset_cancer_predispostion_syndrome	biallelic	BRCA2
pCPS	pediatric-onset_cancer_predispostion_syndrome	biallelic	ABCB11
pCPS	pediatric-onset_cancer_predispostion_syndrome	biallelic	TRIM37
pCPS	pediatric-onset_cancer_predispostion_syndrome	monoallelic	RIT1
pCPS	pediatric-onset_cancer_predispostion_syndrome	biallelic	ATM
pCPS	pediatric-onset_cancer_predispostion_syndrome	biallelic	ITK
pCPS	pediatric-onset_cancer_predispostion_syndrome	monoallelic	SDHD
pCPS	pediatric-onset_cancer_predispostion_syndrome	monoallelic	IKBKAP
pCPS	pediatric-onset_cancer_predispostion_syndrome	biallelic	BLM
pCPS	pediatric-onset_cancer_predispostion_syndrome	monoallelic	SAMD9L
pCPS	pediatric-onset_cancer_predispostion_syndrome	monoallelic	GPR161
pCPS	pediatric-onset_cancer_predispostion_syndrome	biallelic	LIG4
pCPS	pediatric-onset_cancer_predispostion_syndrome	monoallelic	SDHB
pCPS	pediatric-onset_cancer_predispostion_syndrome	biallelic	HAVCR2
pCPS	pediatric-onset_cancer_predispostion_syndrome	monoallelic	SDHA
pCPS	pediatric-onset_cancer_predispostion_syndrome	biallelic	CD27
pCPS	pediatric-onset_cancer_predispostion_syndrome	monoallelic	HRAS
pCPS	pediatric-onset_cancer_predispostion_syndrome	monoallelic	VHL
pCPS	pediatric-onset_cancer_predispostion_syndrome	monoallelic	CDKN2A
pCPS	pediatric-onset_cancer_predispostion_syndrome	monoallelic	SH2D1A
pCPS	pediatric-onset_cancer_predispostion_syndrome	biallelic	USB1
pCPS	pediatric-onset_cancer_predispostion_syndrome	biallelic	PALB2
pCPS	pediatric-onset_cancer_predispostion_syndrome	biallelic	NBN
pCPS	pediatric-onset_cancer_predispostion_syndrome	monoallelic	CEBPA
pCPS	pediatric-onset_cancer_predispostion_syndrome	biallelic	RECQL4
pCPS	pediatric-onset_cancer_predispostion_syndrome	biallelic	SBDS
pCPS	pediatric-onset_cancer_predispostion_syndrome	monoallelic	SAMD9
pCPS	pediatric-onset_cancer_predispostion_syndrome	monoallelic	SDHC
pCPS	pediatric-onset_cancer_predispostion_syndrome	biallelic	PMS2
pCPS	pediatric-onset_cancer_predispostion_syndrome	biallelic	FANCA
pCPS	pediatric-onset_cancer_predispostion_syndrome	biallelic	CD70
pCPS	pediatric-onset_cancer_predispostion_syndrome	biallelic	RMRP
aCPS	adult-onset_cancer_predispostion_syndrome	monoallelic	STAT3
aCPS	adult-onset_cancer_predispostion_syndrome	monoallelic	PRKAR1A
aCPS	adult-onset_cancer_predispostion_syndrome	monoallelic	SOS1
aCPS	adult-onset_cancer_predispostion_syndrome	monoallelic	PDGFRA
aCPS	adult-onset_cancer_predispostion_syndrome	monoallelic	DKC1
aCPS	adult-onset_cancer_predispostion_syndrome	monoallelic	CYLD
aCPS	adult-onset_cancer_predispostion_syndrome	monoallelic	SMAD4
aCPS	adult-onset_cancer_predispostion_syndrome	monoallelic	EXT1
aCPS	adult-onset_cancer_predispostion_syndrome	monoallelic	TERT
aCPS	adult-onset_cancer_predispostion_syndrome	monoallelic	KIT
aCPS	adult-onset_cancer_predispostion_syndrome	monoallelic	MET
aCPS	adult-onset_cancer_predispostion_syndrome	monoallelic	MSH2
aCPS	adult-onset_cancer_predispostion_syndrome	monoallelic	HMBS
aCPS	adult-onset_cancer_predispostion_syndrome	monoallelic	EGFR
aCPS	adult-onset_cancer_predispostion_syndrome	monoallelic	BMPR1A
aCPS	adult-onset_cancer_predispostion_syndrome	monoallelic	TGFBR1
aCPS	adult-onset_cancer_predispostion_syndrome	monoallelic	FLCN
aCPS	adult-onset_cancer_predispostion_syndrome	monoallelic	AXIN2
aCPS	adult-onset_cancer_predispostion_syndrome	monoallelic	MAX
aCPS	adult-onset_cancer_predispostion_syndrome	biallelic	DOCK8
aCPS	adult-onset_cancer_predispostion_syndrome	monoallelic	MSH6
aCPS	adult-onset_cancer_predispostion_syndrome	monoallelic	RHBDF2
aCPS	adult-onset_cancer_predispostion_syndrome	monoallelic	POLD1
aCPS	adult-onset_cancer_predispostion_syndrome	monoallelic	MLH1
aCPS	adult-onset_cancer_predispostion_syndrome	monoallelic	COL7A1
aCPS	adult-onset_cancer_predispostion_syndrome	monoallelic	BRCA2
aCPS	adult-onset_cancer_predispostion_syndrome	monoallelic	POLE
aCPS	adult-onset_cancer_predispostion_syndrome	monoallelic	CDK4
aCPS	adult-onset_cancer_predispostion_syndrome	monoallelic	CDKN1B
aCPS	adult-onset_cancer_predispostion_syndrome	monoallelic	ATM
aCPS	adult-onset_cancer_predispostion_syndrome	monoallelic	EXT2
aCPS	adult-onset_cancer_predispostion_syndrome	biallelic	XPC
aCPS	adult-onset_cancer_predispostion_syndrome	monoallelic	BRIP1
aCPS	adult-onset_cancer_predispostion_syndrome	biallelic	ERCC3
aCPS	adult-onset_cancer_predispostion_syndrome	biallelic	GBA
aCPS	adult-onset_cancer_predispostion_syndrome	biallelic	ERCC5
aCPS	adult-onset_cancer_predispostion_syndrome	biallelic	POLH
aCPS	adult-onset_cancer_predispostion_syndrome	monoallelic	DDB2
aCPS	adult-onset_cancer_predispostion_syndrome	biallelic	ERCC4
aCPS	adult-onset_cancer_predispostion_syndrome	monoallelic	BRCA1
aCPS	adult-onset_cancer_predispostion_syndrome	biallelic	WRN
aCPS	adult-onset_cancer_predispostion_syndrome	biallelic	XPA
aCPS	adult-onset_cancer_predispostion_syndrome	monoallelic	PALB2
aCPS	adult-onset_cancer_predispostion_syndrome	biallelic	FANCC
aCPS	adult-onset_cancer_predispostion_syndrome	biallelic	ERCC2
aCPS	adult-onset_cancer_predispostion_syndrome	biallelic	FANCG
aCPS	adult-onset_cancer_predispostion_syndrome	monoallelic	UROD
aCPS	adult-onset_cancer_predispostion_syndrome	monoallelic	ELANE
aCPS	adult-onset_cancer_predispostion_syndrome	monoallelic	TMEM127
aCPS	adult-onset_cancer_predispostion_syndrome	biallelic	HFE
aCPS	adult-onset_cancer_predispostion_syndrome	biallelic	MUTYH
aCPS	adult-onset_cancer_predispostion_syndrome	monoallelic	RAD51D
aCPS	adult-onset_cancer_predispostion_syndrome	biallelic	SLC25A13
aCPS	adult-onset_cancer_predispostion_syndrome	monoallelic	PMS2
aCPS	adult-onset_cancer_predispostion_syndrome	monoallelic	MTAP
aCPS	adult-onset_cancer_predispostion_syndrome	biallelic	FAH
aCPS	adult-onset_cancer_predispostion_syndrome	monoallelic	RAD51C
aCPS	adult-onset_cancer_predispostion_syndrome	monoallelic	CHEK2
aCPS	adult-onset_cancer_predispostion_syndrome	biallelic	SERPINA1
aCPS	adult-onset_cancer_predispostion_syndrome	monoallelic	SDHAF2
aCPS	adult-onset_cancer_predispostion_syndrome	monoallelic	PRSS1
aCPS	adult-onset_cancer_predispostion_syndrome	monoallelic	GJB2

## Sheet: Zhang_2015
study_year	total_n	ID	chr	pos	ref	alt	gene	classification	var_n	diagnosis_group	diagnosis_type	SNV_SV	ontology	c.HGVS	p.HGVS
Zhang_2015	1120	SJNBL135	chr2	29432664	C	T	ALK	P	1		Neuroblastoma	SNV	missense		R1275Q
Zhang_2015	1120	SJBALL021434	chr5	112176317	A	G	APC	PP	1		ALL with alterations of ERG	SNV	missense		R1676G
Zhang_2015	1120	SJHYPER102	chr5	112175100	G	T	APC	PP	1		Hyperdiploid ALL	SNV	missense		C1270F
Zhang_2015	1120	SJMB002	chr5	112174096	C	A	APC	P	1		Medulloblastoma	SNV	nonsense		Y935*
Zhang_2015	1120	SJMB015	chr5	112154969	C	T	APC	PP	1		Medulloblastoma	SNV	missense		R414C
Zhang_2015	1120	SJNBL192	chr5	112154970	G	A	APC	PP	1		Neuroblastoma	SNV	missense		R414H
Zhang_2015	1120	SJOS001106	chr5	112154969	C	T	APC	PP	1		Osteosarcoma	SNV	missense		R414C
Zhang_2015	1120	SJBALL021324	chr17	41245200	AT	-	BRCA1	P	1		ALL with alterations of ERG	SNV	frameshift		I783fs
Zhang_2015	1120	SJBALL079	chr13	32945092	G	A	BRCA2	P	1		BALL	SNV	splice		W2830_E20splice
Zhang_2015	1120	SJE2A036	chr13	32968863	C	G	BRCA2	P	1		B-Lineage ALL E2A-PBX1 Subtype	SNV	nonsense		Y3098*
Zhang_2015	1120	SJMB012	chr13	32929213	C	-	BRCA2	P	1		Medulloblastoma	SNV	frameshift		P2408fs
Zhang_2015	1120	SJMB039	chr13	32953932	T	A	BRCA2	P	1		Medulloblastoma	SNV	nonsense		L3000*
Zhang_2015	1120	SJNBL138	chr13	32945092	G	A	BRCA2	P	1		Neuroblastoma	SNV	splice		W2830_E20splice
Zhang_2015	1120	SJRHB010	chr13	32911681	GTCA	-	BRCA2	P	1		Rhabdosarcoma	SNV	frameshift		Q1063_S1064fs
Zhang_2015	1120	SJPHALL018	chr16	68846147	C	T	CDH1	PP	1		BCR-ABL1 ALL	SNV	missense		P373L
Zhang_2015	1120	*SJPHALL012	chr12	25398281	C	T	KRAS	P	1		BCR-ABL1 ALL	SNV	missense		G13D
Zhang_2015	1120	SJOS007	chr2	47703538	C	T	MSH2	P	1		Osteosarcoma	SNV	nonsense		R680*
Zhang_2015	1120	SJHGG034	chr2	48026759	AG	-	MSH6	P	1		High Grade Glioma	SNV	frameshift		E546fs
Zhang_2015	1120	SJEPD001502	chr17	29654730	C	T	NF1	PP	1		Ependymoma	SNV	missense		R1807W
Zhang_2015	1120	SJEPD034	chr17	29559721	C	G	NF1	P	1		Ependymoma	SNV	nonsense		Y1106*
Zhang_2015	1120	SJHGG089	chr17	29528489	C	T	NF1	P	1		High Grade Glioma	SNV	nonsense		R416*
Zhang_2015	1120	SJLGG022	chr17	29664899	G	A	NF1	P	1		Low Grade Glioma	SNV	splice		R2214_E43splice
Zhang_2015	1120	SJEPD023	chr22	30038275	G	A	NF2	P	1		Ependymoma	SNV	splice		K149_E4splice
Zhang_2015	1120	SJHYPER143	chr22	30035183	ACA	-	NF2	PP	1		Hyperdiploid ALL	SNV	proteinDel		Q115_H116>H
Zhang_2015	1120	SJHYPO020	chr1	115258748	C	T	NRAS	PP	1		Hypodiploid ALL	SNV	missense		G12S
Zhang_2015	1120	SJOS001118	chr16	23646219	T	-	PALB2	PP	1		Osteosarcoma	SNV	frameshift		K550fs
Zhang_2015	1120	SJHGG003	chr7	6026469	G	A	PMS2	P	1		High Grade Glioma	SNV	nonsense		Q643*
Zhang_2015	1120	SJHGG111	chr7	6026469	G	A	PMS2	P	1		High Grade Glioma	SNV	nonsense		Q643*
Zhang_2015	1120	SJHGG111	chr7	6027157	-	T	PMS2	P	1		High Grade Glioma	SNV	frameshift		K413fs
Zhang_2015	1120	SJBALL013	chr9	98218616	-	C	PTCH1	P	1		BALL	SNV	frameshift		V1082fs
Zhang_2015	1120	^SJRB002	chr13	48953730	C	T	RB1	P	1		Retinoblastoma	SNV	nonsense		R445*
Zhang_2015	1120	SJOS001111	chr13	48941629	G	A	RB1	P	1		Osteosarcoma	SNV	splice		V314_E10splice
Zhang_2015	1120	SJRB001130	chr13	48953730	C	T	RB1	P	1		Retinoblastoma	SNV	nonsense		R445*
Zhang_2015	1120	SJEWS001308	chr10	43613906	G	C	RET	P	1		Ewing's sarcoma	SNV	missense		L790F
Zhang_2015	1120	SJHYPO146	chr10	43614996	G	A	RET	P	1		Hypodiploid ALL	SNV	missense		V804M
Zhang_2015	1120	SJINF015	chr21	36206901	A	G	RUNX1	PP	1		Infant ALL	SNV	splice		R178_E4splice
Zhang_2015	1120	SJLGG009	chr21	36252887	T	C	RUNX1	P	1		Low Grade Glioma	SNV	missense		N159D
Zhang_2015	1120	SJPHALL020044	chr21	36231773	C	T	RUNX1	PP	1		BCR-ABL1 ALL	SNV	missense		R204Q
Zhang_2015	1120	SJMLL010	chr5	224547	C	T	SDHA	PP	1		Mixed Lineage Leukemia	SNV	nonsense		R75*
Zhang_2015	1120	SJNBL034	chr1	17371320	G	C	SDHB	PP	1		Neuroblastoma	SNV	missense		R46G
Zhang_2015	1120	^SJHYPO055	chr17	7579313	G	C	TP53	P	1		Hypodiploid ALL	SNV	missense		T125R
Zhang_2015	1120	^SJHYPO119	chr17	7577120	C	T	TP53	P	1		Hypodiploid ALL	SNV	missense		R273H
Zhang_2015	1120	^SJHYPO140	chr17	7578212	G	A	TP53	P	1		Hypodiploid ALL	SNV	nonsense		R213*
Zhang_2015	1120	SJACT001	chr17	7574033	T	A	TP53	P	1		Adrenocortical Carcinoma	SNV	missense		I332F
Zhang_2015	1120	SJACT002	chr17	7578211	C	T	TP53	P	1		Adrenocortical Carcinoma	SNV	missense		R213Q
Zhang_2015	1120	SJACT005	chr17	7577121	G	A	TP53	P	1		Adrenocortical Carcinoma	SNV	missense		R273C
Zhang_2015	1120	SJACT008	chr17	7577548	C	A	TP53	P	1		Adrenocortical Carcinoma	SNV	missense		G245C
Zhang_2015	1120	SJACT010	chr17	7578263	G	A	TP53	P	1		Adrenocortical Carcinoma	SNV	nonsense		R196*
Zhang_2015	1120	SJACT012	chr17	7577084	T	A	TP53	P	1		Adrenocortical Carcinoma	SNV	missense		E285V
Zhang_2015	1120	SJACT013	chr17	7577141	C	T	TP53	P	1		Adrenocortical Carcinoma	SNV	missense		G266E
Zhang_2015	1120	SJACT014	chr17	7579311	C	T	TP53	P	1		Adrenocortical Carcinoma	SNV	splice		T125_E4splice
Zhang_2015	1120	SJACT015	chr17	7578461	C	A	TP53	P	1		Adrenocortical Carcinoma	SNV	missense		V157F
Zhang_2015	1120	SJACT018	chr17	7578197	C	T	TP53	P	1		Adrenocortical Carcinoma	SNV	missense		V218M
Zhang_2015	1120	SJACT025	chr17	7576916	-	T	TP53	P	1		Adrenocortical Carcinoma	SNV	frameshift		N310fs
Zhang_2015	1120	SJACT026	chr17	7574017	C	T	TP53	P	1		Adrenocortical Carcinoma	SNV	missense		R337H
Zhang_2015	1120	SJACT027	chr17	7574017	C	T	TP53	P	1		Adrenocortical Carcinoma	SNV	missense		R337H
Zhang_2015	1120	SJACT028	chr17	7574017	C	T	TP53	P	1		Adrenocortical Carcinoma	SNV	missense		R337H
Zhang_2015	1120	SJACT060	chr17	7574017	C	T	TP53	P	1		Adrenocortical Carcinoma	SNV	missense		R337H
Zhang_2015	1120	SJACT061	chr17	7574017	C	T	TP53	P	1		Adrenocortical Carcinoma	SNV	missense		R337H
Zhang_2015	1120	SJACT062	chr17	7574017	C	T	TP53	P	1		Adrenocortical Carcinoma	SNV	missense		R337H
Zhang_2015	1120	SJACT063	chr17	7574017	C	T	TP53	P	1		Adrenocortical Carcinoma	SNV	missense		R337H
Zhang_2015	1120	SJACT064	chr17	7574017	C	T	TP53	P	1		Adrenocortical Carcinoma	SNV	missense		R337H
Zhang_2015	1120	SJACT066	chr17	7574017	C	T	TP53	P	1		Adrenocortical Carcinoma	SNV	missense		R337H
Zhang_2015	1120	SJACT067	chr17	7574017	C	T	TP53	P	1		Adrenocortical Carcinoma	SNV	missense		R337H
Zhang_2015	1120	SJACT068	chr17	7574017	C	T	TP53	P	1		Adrenocortical Carcinoma	SNV	missense		R337H
Zhang_2015	1120	SJACT069	chr17	7574017	C	T	TP53	P	1		Adrenocortical Carcinoma	SNV	missense		R337H
Zhang_2015	1120	SJACT070	chr17	7574017	C	T	TP53	P	1		Adrenocortical Carcinoma	SNV	missense		R337H
Zhang_2015	1120	SJACT071	chr17	7574017	C	T	TP53	P	1		Adrenocortical Carcinoma	SNV	missense		R337H
Zhang_2015	1120	SJACT024	chr17	7573010	T	C	TP53	P	1		Adrenocortical Carcinoma	SNV	splice		S367_E11splice
Zhang_2015	1120	SJACT007	chr17	7579312	C	T	TP53	P	1		Adrenocortical Carcinoma	SNV	splice		T125T
Zhang_2015	1120	SJBALL264	chr17	7577577	T	C	TP53	P	1		BALL	SNV	missense		N235S
Zhang_2015	1120	SJCPC001011	chr17	7577538	C	T	TP53	P	1		Choroid Plexus Carcinoma	SNV	missense		R248Q
Zhang_2015	1120	SJEPD008	chr17	7579368	A	G	TP53	PP	1		Ependymoma	SNV	missense		Y107H
Zhang_2015	1120	SJEWS010370	chr17	7578547	G	A	TP53	P	1		Ewing's sarcoma	SNV	missense		P128L
Zhang_2015	1120	SJEWS010375	chr17	7578184	G	A	TP53	P	1		Ewing's sarcoma	SNV	missense		P222L
Zhang_2015	1120	SJEWS010425	chr17	7577069	C	T	TP53	P	1		Ewing's sarcoma	SNV	missense		R290H
Zhang_2015	1120	SJHGG028	chr17	7578263	G	A	TP53	P	1		High Grade Glioma	SNV	nonsense		R196*
Zhang_2015	1120	SJHGG115	chr17	7577538	C	T	TP53	P	1		High Grade Glioma	SNV	missense		R248Q
Zhang_2015	1120	SJHYPO004	chr17	7579541	TC	-	TP53	P	1		Hypodiploid ALL	SNV	frameshift		D49fs
Zhang_2015	1120	SJHYPO005	chr17	7577548	C	T	TP53	P	1		Hypodiploid ALL	SNV	missense		G245S
Zhang_2015	1120	SJHYPO051	chr17	7579359	GGAAA	-	TP53	P	1		Hypodiploid ALL	SNV	frameshift		G108_R110fs
Zhang_2015	1120	SJHYPO120	chr17	7577098	T	A	TP53	P	1		Hypodiploid ALL	SNV	missense		R280S
Zhang_2015	1120	SJHYPO126	chr17	7578444	G	-	TP53	P	1		Hypodiploid ALL	SNV	frameshift		I162fs
Zhang_2015	1120	SJOS001110	chr17	7579358	CGGA	-	TP53	P	1		Osteosarcoma	SNV	frameshift		F109_R110fs
Zhang_2015	1120	SJOS001119	chr17	7574017	C	A	TP53	P	1		Osteosarcoma	SNV	missense		R337L
Zhang_2015	1120	SJOS006	chr17	7574017	C	A	TP53	P	1		Osteosarcoma	SNV	missense		R337L
Zhang_2015	1120	SJRHB003	chr17	7578406	C	T	TP53	P	1		Rhabdosarcoma	SNV	missense		R175H
Zhang_2015	1120	SJRHB039	chr17	7577539	G	A	TP53	P	1		Rhabdosarcoma	SNV	missense		R248W
Zhang_2015	1120	SJHGG047	chr3	10191605	C	T	VHL	PP	1		High Grade Glioma	SNV	missense		R200W
Zhang_2015	1120	SJHYPER126	chr3	10191569	C	G	VHL	PP	1		Hyperdiploid ALL	SNV	missense		L188V
Zhang_2015	1120	SJHGG078	chr17	7564505-7575230			TP53	P	1		High Grade Glioma	SNV	loss		10,725bp
Zhang_2015	1120	SJHYPO052	chr17	7577958-7586694			TP53	P	1		Hypodiploid ALL	SNV	loss		8,736bp
Zhang_2015	1120	SJETV073	chr12	24018501-25869400			KRAS	P	1		ETV6-RUNX1 ALL	SNV	gain		1,850,899bp
Zhang_2015	1120	SJEWS001316	chr7	6028952-6033903			PMS2	P	1		Ewing's sarcoma	SNV	loss		4,951bp
Zhang_2015	1120	SJLGG040	chr7	6022601-606054			PMS2	P	1		Low Grade Glioma	SNV	loss		3,7942bp
Zhang_2015	1120	SJINF005	chr2	29416472	C	T	ALK	U	1		Infant ALL	SNV	missense		G1494E
Zhang_2015	1120	SJPHALL020047	chr2	29416473	C	T	ALK	PB	1		BCR-ABL1 ALL	SNV	missense		G1494R
Zhang_2015	1120	SJINF001	chr2	29416650	C	T	ALK	PB	1		Infant ALL	SNV	missense		E1435K
Zhang_2015	1120	SJETV082	chr2	29416753	T	G	ALK	PB	1		ETV6-RUNX1 ALL	SNV	missense		E1400D
Zhang_2015	1120	SJHYPER146	chr2	29420409	C	T	ALK	PB	1		Hyperdiploid ALL	SNV	missense		V1358I
Zhang_2015	1120	SJHGG056	chr2	29420453	G	A	ALK	U	1		High Grade Glioma	SNV	missense		T1343I
Zhang_2015	1120	SJE2A003	chr2	29436908	C	T	ALK	U	1		B-Lineage ALL E2A-PBX1 Subtype	SNV	missense		V1229M
Zhang_2015	1120	SJOS001125	chr2	29443592	G	A	ALK	U	1		Osteosarcoma	SNV	nonsense		R1209*
Zhang_2015	1120	SJNBL138	chr2	29443645	G	T	ALK	U	1		Neuroblastoma	SNV	missense		P1191H
Zhang_2015	1120	SJNBL199	chr2	29446237	C	G	ALK	PB	1		Neuroblastoma	SNV	missense		E1110D
Zhang_2015	1120	SJETV027	chr2	29446385	C	T	ALK	PB	1		ETV6-RUNX1 ALL	SNV	missense		R1061Q
Zhang_2015	1120	SJETV010	chr2	29448384	C	T	ALK	U	1		ETV6-RUNX1 ALL	SNV	missense		V1039M
Zhang_2015	1120	SJRHB031	chr2	29451938	G	A	ALK	U	1		Rhabdosarcoma	SNV	missense		A876V
Zhang_2015	1120	SJEPD016	chr2	29473981	C	T	ALK	PB	1		Ependymoma	SNV	missense		D732N
Zhang_2015	1120	SJBALL021516	chr2	29474026	C	T	ALK	U	1		ALL with alterations of ERG	SNV	missense		E717K
Zhang_2015	1120	SJNBL004	chr2	29474044	T	G	ALK	PB	1		Neuroblastoma	SNV	missense		S711R
Zhang_2015	1120	SJHGG099	chr2	29497990	T	A	ALK	PB	1		High Grade Glioma	SNV	missense		R672S
Zhang_2015	1120	SJACT067	chr2	29498007	C	T	ALK	PB	1		Adrenocortical Carcinoma	SNV	missense		G667R
Zhang_2015	1120	SJBALL021512	chr2	29498088	C	T	ALK	U	1		ALL with alterations of ERG	SNV	missense		G640R
Zhang_2015	1120	SJE2A026	chr2	29519814	G	A	ALK	PB	1		B-Lineage ALL E2A-PBX1 Subtype	SNV	missense		A586V
Zhang_2015	1120	SJBALL020383	chr2	29519851	C	T	ALK	U	1		ALL with alterations of ERG	SNV	missense		G574R
Zhang_2015	1120	SJRHB059	chr2	29551352	A	G	ALK	PB	1		Rhabdosarcoma	SNV	splice		E427_E6splice
Zhang_2015	1120	SJE2A009	chr2	29754787	T	A	ALK	U	1		B-Lineage ALL E2A-PBX1 Subtype	SNV	missense		K383M
Zhang_2015	1120	SJEWS010367	chr2	29754824	C	T	ALK	PB	1		Ewing's sarcoma	SNV	missense		A371T
Zhang_2015	1120	SJNBL044	chr2	29917743	C	T	ALK	PB	1		Neuroblastoma	SNV	missense		A309T
Zhang_2015	1120	SJEWS010425	chr2	29917860	A	G	ALK	PB	1		Ewing's sarcoma	SNV	missense		F270L
Zhang_2015	1120	SJOS006	chr2	30143176	G	C	ALK	PB	1		Osteosarcoma	SNV	missense		P117R
Zhang_2015	1120	SJHGG041	chr2	30143408	G	A	ALK	U	1		High Grade Glioma	SNV	missense		P40S
Zhang_2015	1120	SJEPD029	chr2	30143420	G	A	ALK	PB	1		Ependymoma	SNV	missense		P36S
Zhang_2015	1120	SJNBL175	chr5	112103053	A	G	APC	PB	1		Neuroblastoma	SNV	missense		S130G
Zhang_2015	1120	SJRHB043	chr5	112111352	A	G	APC	U	1		Rhabdosarcoma	SNV	missense		K150R
Zhang_2015	1120	SJACT012	chr5	112116562	C	G	APC	PB	1		Adrenocortical Carcinoma	SNV	missense		Q203E
Zhang_2015	1120	SJEPD021	chr5	112116562	C	G	APC	PB	1		Ependymoma	SNV	missense		Q203E
Zhang_2015	1120	SJETV003	chr5	112128218	G	A	APC	PB	1		ETV6-RUNX1 ALL	SNV	missense		E241K
Zhang_2015	1120	SJHGG002	chr5	112128218	G	A	APC	PB	1		High Grade Glioma	SNV	missense		E241K
Zhang_2015	1120	SJINF021	chr5	112154911	G	T	APC	PB	1		Infant ALL	SNV	missense		Q394H
Zhang_2015	1120	SJETV032	chr5	112154972	G	A	APC	PB	1		ETV6-RUNX1 ALL	SNV	missense		A415T
Zhang_2015	1120	SJOS006	chr5	112173381	C	T	APC	PB	1		Osteosarcoma	SNV	missense		A697V
Zhang_2015	1120	SJE2A065	chr5	112173767	T	G	APC	U	1		B-Lineage ALL E2A-PBX1 Subtype	SNV	missense		L826V
Zhang_2015	1120	SJEPD001508	chr5	112174138	G	T	APC	U	1		Ependymoma	SNV	missense		M949I
Zhang_2015	1120	SJLGG015	chr5	112174257	A	G	APC	U	1		Low Grade Glioma	SNV	missense		D989G
Zhang_2015	1120	SJMB031	chr5	112174257	A	G	APC	U	1		Medulloblastoma	SNV	missense		D989G
Zhang_2015	1120	SJEPD001529	chr5	112174540	T	G	APC	PB	1		Ependymoma	SNV	missense		D1083E
Zhang_2015	1120	SJBALL020828	chr5	112174665	T	C	APC	U	1		ALL with alterations of ERG	SNV	missense		V1125A
Zhang_2015	1120	SJMB026	chr5	112174669	C	G	APC	U	1		Medulloblastoma	SNV	missense		S1126R
Zhang_2015	1120	SJHGG031	chr5	112174770	C	A	APC	PB	1		High Grade Glioma	SNV	missense		T1160K
Zhang_2015	1120	SJEPD012	chr5	112175271	C	T	APC	PB	1		Ependymoma	SNV	missense		S1327L
Zhang_2015	1120	SJCBF006	chr5	112175363	G	A	APC	U	1		Core binding factor AML	SNV	missense		A1358T
Zhang_2015	1120	SJHYPO114	chr5	112175363	G	A	APC	U	1		Hypodiploid ALL	SNV	missense		A1358T
Zhang_2015	1120	SJHYPO026	chr5	112175627	G	A	APC	PB	1		Hypodiploid ALL	SNV	missense		A1446T
Zhang_2015	1120	SJNBL014	chr5	112175627	G	A	APC	PB	1		Neuroblastoma	SNV	missense		A1446T
Zhang_2015	1120	SJCBF001	chr5	112175862	T	G	APC	PB	1		Core binding factor AML	SNV	missense		I1524R
Zhang_2015	1120	SJTALL011	chr5	112175916	C	G	APC	PB	1		T-cell ALL	SNV	missense		P1542R
Zhang_2015	1120	SJCBF125	chr5	112176189	C	T	APC	U	1		Core binding factor AML	SNV	missense		T1633I
Zhang_2015	1120	SJHGG033	chr5	112176202	T	G	APC	PB	1		High Grade Glioma	SNV	missense		D1637E
Zhang_2015	1120	SJHGG058	chr5	112176254	A	G	APC	U	1		High Grade Glioma	SNV	missense		T1655A
Zhang_2015	1120	*SJHYPO016	chr5	112176300	C	T	APC	PB	1		Hypodiploid ALL	SNV	missense		A1670V
Zhang_2015	1120	SJMB027	chr5	112176431	G	A	APC	U	1		Medulloblastoma	SNV	missense		D1714N
Zhang_2015	1120	SJHYPER019	chr5	112176926	G	T	APC	PB	1		Hyperdiploid ALL	SNV	missense		A1879S
Zhang_2015	1120	SJPHALL020044	chr5	112176926	G	C	APC	PB	1		BCR-ABL1 ALL	SNV	missense		A1879P
Zhang_2015	1120	SJNBL006	chr5	112176996	C	T	APC	PB	1		Neuroblastoma	SNV	missense		S1902F
Zhang_2015	1120	SJHYPO041	chr5	112177092	C	T	APC	PB	1		Hypodiploid ALL	SNV	missense		P1934L
Zhang_2015	1120	SJCBF143	chr5	112177176	G	A	APC	U	1		Core binding factor AML	SNV	missense		C1962Y
Zhang_2015	1120	SJOS001126	chr5	112177248	C	T	APC	PB	1		Osteosarcoma	SNV	missense		P1986L
Zhang_2015	1120	SJCBF008	chr5	112177313	G	A	APC	U	1		Core binding factor AML	SNV	missense		A2008T
Zhang_2015	1120	SJOS001127	chr5	112177422	G	A	APC	PB	1		Osteosarcoma	SNV	missense		S2044N
Zhang_2015	1120	SJCBF011	chr5	112177764	C	G	APC	U	1		Core binding factor AML	SNV	missense		P2158R
Zhang_2015	1120	SJBALL021896	chr5	112177803	G	A	APC	U	1		BALL	SNV	missense		G2171E
Zhang_2015	1120	SJCBF142	chr5	112178148	C	T	APC	PB	1		Core binding factor AML	SNV	missense		A2286V
Zhang_2015	1120	SJCBF013	chr5	112178327	C	T	APC	U	1		Core binding factor AML	SNV	missense		P2346S
Zhang_2015	1120	SJBALL021434	chr5	112178690	C	A	APC	U	1		ALL with alterations of ERG	SNV	missense		P2467T
Zhang_2015	1120	SJTALL078	chr5	112178781	C	T	APC	PB	1		T-cell ALL	SNV	missense		S2497L
Zhang_2015	1120	SJINF061	chr5	112178841	A	G	APC	U	1		Infant ALL	SNV	missense		Y2517C
Zhang_2015	1120	SJHYPER091	chr5	112178849	G	A	APC	U	1		Hyperdiploid ALL	SNV	missense		G2520R
Zhang_2015	1120	SJE2A038	chr5	112178916	A	G	APC	PB	1		B-Lineage ALL E2A-PBX1 Subtype	SNV	missense		N2542S
Zhang_2015	1120	SJHYPO022	chr5	112179680	A	G	APC	PB	1		Hypodiploid ALL	SNV	missense		S2797G
Zhang_2015	1120	SJPHALL029	chr5	112179753	A	G	APC	PB	1		BCR-ABL1 ALL	SNV	missense		D2821G
Zhang_2015	1120	SJOS001108	chr3	52439298	T	G	BAP1	PB	1		Osteosarcoma	SNV	missense		E315A
Zhang_2015	1120	SJNBL027	chr10	88649849	C	G	BMPR1A	PB	1		Neuroblastoma	SNV	missense		T33S
Zhang_2015	1120	SJE2A028	chr10	88659831	A	G	BMPR1A	PB	1		B-Lineage ALL E2A-PBX1 Subtype	SNV	missense		M160V
Zhang_2015	1120	SJNBL175	chr10	88676928	G	A	BMPR1A	PB	1		Neuroblastoma	SNV	missense		R238Q
Zhang_2015	1120	SJBALL020570	chr10	88677054	C	G	BMPR1A	U	1		iAmp21 ALL	SNV	missense		T280S
Zhang_2015	1120	SJE2A028	chr7	140487375	T	C	BRAF	PB	1		B-Lineage ALL E2A-PBX1 Subtype	SNV	missense		R384G
Zhang_2015	1120	SJEPD021	chr7	140624440	C	T	BRAF	PB	1		Ependymoma	SNV	missense		D22N
Zhang_2015	1120	SJE2A016	chr17	41223240	A	G	BRCA1	PB	1		B-Lineage ALL E2A-PBX1 Subtype	SNV	missense		L1585P
Zhang_2015	1120	SJOS001127	chr17	41223240	A	G	BRCA1	PB	1		Osteosarcoma	SNV	missense		L1585P
Zhang_2015	1120	SJHYPER022	chr17	41226374	G	A	BRCA1	PB	1		Hyperdiploid ALL	SNV	missense		T1571I
Zhang_2015	1120	SJCBF026	chr17	41226387	C	T	BRCA1	PB	1		Core binding factor AML	SNV	missense		D1567N
Zhang_2015	1120	SJMB002	chr17	41243502	G	A	BRCA1	PB	1		Medulloblastoma	SNV	missense		T1349M
Zhang_2015	1120	SJHGG107	chr17	41243725	T	C	BRCA1	PB	1		High Grade Glioma	SNV	missense		I1275V
Zhang_2015	1120	SJCBF121	chr17	41243788	T	C	BRCA1	PB	1		Core binding factor AML	SNV	missense		K1254E
Zhang_2015	1120	SJTALL071	chr17	41243809	C	T	BRCA1	PB	1		T-cell ALL	SNV	missense		V1247I
Zhang_2015	1120	SJINF014	chr17	41243948	C	A	BRCA1	U	1		Infant ALL	SNV	missense		Q1200H
Zhang_2015	1120	SJHYPER121	chr17	41244007	C	T	BRCA1	PB	1		Hyperdiploid ALL	SNV	missense		V1181I
Zhang_2015	1120	SJE2A011	chr17	41244094	C	T	BRCA1	U	1		B-Lineage ALL E2A-PBX1 Subtype	SNV	missense		D1152N
Zhang_2015	1120	SJETV093	chr17	41244304	C	A	BRCA1	PB	1		ETV6-RUNX1 ALL	SNV	missense		A1082S
Zhang_2015	1120	*SJHYPO045	chr17	41244465	C	T	BRCA1	PB	1		Hypodiploid ALL	SNV	missense		R1028H
Zhang_2015	1120	SJHYPO124	chr17	41244524	C	T	BRCA1	PB	1		Hypodiploid ALL	SNV	missense		M1008I
Zhang_2015	1120	SJRB016	chr17	41244842	T	G	BRCA1	PB	1		Retinoblastoma	SNV	missense		E902D
Zhang_2015	1120	SJHGG074	chr17	41244952	G	A	BRCA1	B	1		High Grade Glioma	SNV	missense		R866C
Zhang_2015	1120	SJHGG048	chr17	41244964	T	C	BRCA1	U	1		High Grade Glioma	SNV	missense		K862E
Zhang_2015	1120	SJPHALL018	chr17	41244982	A	G	BRCA1	PB	1		BCR-ABL1 ALL	SNV	missense		Y856H
Zhang_2015	1120	SJBALL021372	chr17	41245071	G	T	BRCA1	PB	1		ALL with alterations of ERG	SNV	missense		T826K
Zhang_2015	1120	SJNBL162	chr17	41245189	C	T	BRCA1	PB	1		Neuroblastoma	SNV	missense		E787K
Zhang_2015	1120	SJLGG034	chr17	41245204	T	C	BRCA1	U	1		Low Grade Glioma	SNV	missense		S782G
Zhang_2015	1120	SJHGG062	chr17	41245233	A	G	BRCA1	PB	1		High Grade Glioma	SNV	missense		V772A
Zhang_2015	1120	SJMB011	chr17	41245233	A	G	BRCA1	PB	1		Medulloblastoma	SNV	missense		V772A
Zhang_2015	1120	SJEPD027	chr17	41245455	G	A	BRCA1	U	1		Ependymoma	SNV	missense		P698L
Zhang_2015	1120	SJAMLM7069	chr17	41245546	G	A	BRCA1	PB	1		Acute megakaryoblastic leukemia	SNV	missense		L668F
Zhang_2015	1120	SJE2A014	chr17	41245703	AGA	-	BRCA1	U	1		B-Lineage ALL E2A-PBX1 Subtype	SNV	proteinDel		S615del
Zhang_2015	1120	SJEPD035	chr17	41245703	AGA	-	BRCA1	U	1		Ependymoma	SNV	proteinDel		S615del
Zhang_2015	1120	SJEPD016	chr17	41245704	G	A	BRCA1	U	1		Ependymoma	SNV	missense		S615F
Zhang_2015	1120	SJINF020	chr17	41245759	C	T	BRCA1	U	1		Infant ALL	SNV	missense		E597K
Zhang_2015	1120	SJEPD001528	chr17	41246315	A	C	BRCA1	PB	1		Ependymoma	SNV	missense		D411E
Zhang_2015	1120	SJNBL177	chr17	41246724	C	T	BRCA1	U	1		Neuroblastoma	SNV	missense		G275D
Zhang_2015	1120	SJLGG010	chr17	41246812	A	C	BRCA1	U	1		Low Grade Glioma	SNV	missense		L246V
Zhang_2015	1120	SJNBL046	chr17	41246812	A	C	BRCA1	U	1		Neuroblastoma	SNV	missense		L246V
Zhang_2015	1120	SJBALL021897	chr17	41258496	T	A	BRCA1	PB	1		BALL	SNV	missense		L63F
Zhang_2015	1120	SJTALL001	chr17	41267753	T	G	BRCA1	U	1		T-cell ALL	SNV	missense		I42L
Zhang_2015	1120	SJNBL033	chr17	41267756	G	T	BRCA1	U	1		Neuroblastoma	SNV	missense		H41N
Zhang_2015	1120	SJLGG020	chr13	32899218	A	C	BRCA2	PB	1		Low Grade Glioma	SNV	missense		N108H
Zhang_2015	1120	SJERG006	chr13	32900409	A	G	BRCA2	U	1		ALL with alterations of ERG	SNV	missense		K169R
Zhang_2015	1120	SJBALL020704	chr13	32900658	T	C	BRCA2	U	1		PH-LIKE	SNV	missense		I180T
Zhang_2015	1120	SJETV083	chr13	32906502	A	G	BRCA2	PB	1		ETV6-RUNX1 ALL	SNV	missense		Y296C
Zhang_2015	1120	SJNBL154	chr13	32906571	A	C	BRCA2	PB	1		Neuroblastoma	SNV	missense		N319T
Zhang_2015	1120	SJCBF109	chr13	32907081	C	G	BRCA2	U	1		Core binding factor AML	SNV	missense		S489C
Zhang_2015	1120	SJERG009	chr13	32907246	C	T	BRCA2	PB	1		ALL with alterations of ERG	SNV	missense		T544I
Zhang_2015	1120	SJCBF003	chr13	32907401	G	C	BRCA2	U	1		Core binding factor AML	SNV	missense		D596H
Zhang_2015	1120	SJPHALL020041	chr13	32907401	G	C	BRCA2	U	1		BCR-ABL1 ALL	SNV	missense		D596H
Zhang_2015	1120	SJHYPO120	chr13	32910485	A	G	BRCA2	U	1		Hypodiploid ALL	SNV	missense		T665A
Zhang_2015	1120	SJTALL071	chr13	32910752	C	G	BRCA2	PB	1		T-cell ALL	SNV	missense		Q754E
Zhang_2015	1120	SJETV045	chr13	32911190	A	G	BRCA2	PB	1		ETV6-RUNX1 ALL	SNV	missense		N900D
Zhang_2015	1120	SJACT026	chr13	32911418	T	A	BRCA2	PB	1		Adrenocortical Carcinoma	SNV	missense		S976T
Zhang_2015	1120	SJLGG025	chr13	32911418	T	A	BRCA2	PB	1		Low Grade Glioma	SNV	missense		S976T
Zhang_2015	1120	SJMB031	chr13	32911418	T	A	BRCA2	PB	1		Medulloblastoma	SNV	missense		S976T
Zhang_2015	1120	SJMLL010	chr13	32911418	T	A	BRCA2	PB	1		Mixed Lineage Leukemia	SNV	missense		S976T
Zhang_2015	1120	SJTALL003	chr13	32911418	T	A	BRCA2	PB	1		T-cell ALL	SNV	missense		S976T
Zhang_2015	1120	SJTALL067	chr13	32911418	T	A	BRCA2	PB	1		T-cell ALL	SNV	missense		S976T
Zhang_2015	1120	SJNBL184	chr13	32911547	C	G	BRCA2	B	1		Neuroblastoma	SNV	missense		L1019V
Zhang_2015	1120	SJNBL142	chr13	32911593	T	C	BRCA2	U	1		Neuroblastoma	SNV	missense		I1034T
Zhang_2015	1120	SJLGG018	chr13	32911629	A	G	BRCA2	U	1		Low Grade Glioma	SNV	missense		E1046G
Zhang_2015	1120	SJOS001104	chr13	32911893	G	C	BRCA2	U	1		Osteosarcoma	SNV	missense		S1134T
Zhang_2015	1120	SJPHALL018	chr13	32911937	A	G	BRCA2	U	1		BCR-ABL1 ALL	SNV	missense		M1149V
Zhang_2015	1120	SJRHB002	chr13	32911955	A	G	BRCA2	PB	1		Rhabdosarcoma	SNV	missense		T1155A
Zhang_2015	1120	SJMB004	chr13	32912159	C	T	BRCA2	PB	1		Medulloblastoma	SNV	missense		H1223Y
Zhang_2015	1120	SJCBF092	chr13	32913062	T	G	BRCA2	U	1		Core binding factor AML	SNV	missense		F1524V
Zhang_2015	1120	SJHYPER113	chr13	32913077	G	A	BRCA2	U	1		Hyperdiploid ALL	SNV	missense		G1529R
Zhang_2015	1120	SJCBF105	chr13	32913522	G	T	BRCA2	U	1		Core binding factor AML	SNV	missense		R1677I
Zhang_2015	1120	SJMB016	chr13	32913587	G	A	BRCA2	PB	1		Medulloblastoma	SNV	missense		D1699N
Zhang_2015	1120	SJPHALL020047	chr13	32913587	G	A	BRCA2	PB	1		BCR-ABL1 ALL	SNV	missense		D1699N
Zhang_2015	1120	*SJOS001106	chr13	32913656	A	T	BRCA2	PB	1		Osteosarcoma	SNV	missense		S1722C
Zhang_2015	1120	SJOS001117	chr13	32914371	G	A	BRCA2	PB	1		Osteosarcoma	SNV	missense		C1960Y
Zhang_2015	1120	SJCBF142	chr13	32914481	A	G	BRCA2	U	1		Core binding factor AML	SNV	missense		R1997G
Zhang_2015	1120	SJNBL016	chr13	32914782	C	T	BRCA2	U	1		Neuroblastoma	SNV	missense		T2097M
Zhang_2015	1120	SJETV047	chr13	32914809	T	C	BRCA2	PB	1		ETV6-RUNX1 ALL	SNV	missense		L2106P
Zhang_2015	1120	SJBALL021324	chr13	32915313	G	T	BRCA2	U	1		ALL with alterations of ERG	SNV	missense		G2274V
Zhang_2015	1120	SJERG020299	chr13	32929178	G	T	BRCA2	PB	1		ALL with alterations of ERG	SNV	missense		L2396F
Zhang_2015	1120	SJNBL016	chr13	32937450	C	T	BRCA2	PB	1		Neuroblastoma	SNV	missense		S2704F
Zhang_2015	1120	SJNBL025	chr13	32937450	C	T	BRCA2	PB	1		Neuroblastoma	SNV	missense		S2704F
Zhang_2015	1120	SJEWS010367	chr13	32937554	G	A	BRCA2	PB	1		Ewing's sarcoma	SNV	missense		V2739I
Zhang_2015	1120	SJMB016	chr13	32937554	G	A	BRCA2	PB	1		Medulloblastoma	SNV	missense		V2739I
Zhang_2015	1120	*SJHYPO045	chr13	32944573	A	G	BRCA2	U	1		Hypodiploid ALL	SNV	missense		Y2789C
Zhang_2015	1120	SJERG022	chr13	32944584	G	A	BRCA2	U	1		ALL with alterations of ERG	SNV	missense		G2793R
Zhang_2015	1120	SJLGG003	chr13	32944645	G	A	BRCA2	U	1		Low Grade Glioma	SNV	missense		G2813E
Zhang_2015	1120	SJBALL021514	chr13	32953617	G	A	BRCA2	U	1		ALL with alterations of ERG	SNV	missense		R2973H
Zhang_2015	1120	SJOS001123	chr13	32953985	AGTAAA	-	BRCA2	U	1		Osteosarcoma	SNV	proteinDel		S3018_K3019del
Zhang_2015	1120	SJNBL015	chr13	32968861	T	C	BRCA2	B	1		Neuroblastoma	SNV	missense		Y3098H
Zhang_2015	1120	SJHYPER121	chr13	32969027	G	C	BRCA2	PB	1		Hyperdiploid ALL	SNV	missense		G3153A
Zhang_2015	1120	SJERG007	chr13	32971165	C	A	BRCA2	PB	1		ALL with alterations of ERG	SNV	missense		T3211K
Zhang_2015	1120	SJCBF110	chr13	32972420	A	G	BRCA2	PB	1		Core binding factor AML	SNV	missense		K3257R
Zhang_2015	1120	SJPHALL005	chr13	32972747	-	ATTATATCTA	BRCA2	B	1		BCR-ABL1 ALL	SNV	frameshift		S3366fs
Zhang_2015	1120	SJMB032	chr13	32972761	A	G	BRCA2	U	1		Medulloblastoma	SNV	missense		T3371A
Zhang_2015	1120	SJMB006	chr11	119146750	A	G	CBL	PB	1		Medulloblastoma	SNV	missense		I305V
Zhang_2015	1120	SJOS004	chr11	119149416	G	T	CBL	PB	1		Osteosarcoma	SNV	missense		G475V
Zhang_2015	1120	SJETV003	chr11	119155775	C	G	CBL	PB	1		ETV6-RUNX1 ALL	SNV	missense		P510A
Zhang_2015	1120	SJBALL239	chr11	119156022	C	T	CBL	U	1		iAmp21 ALL	SNV	missense		R563C
Zhang_2015	1120	SJHGG033	chr11	119156031	C	G	CBL	U	1		High Grade Glioma	SNV	missense		P566A
Zhang_2015	1120	SJNBL001	chr11	119156185	G	T	CBL	U	1		Neuroblastoma	SNV	missense		R617L
Zhang_2015	1120	SJERG023	chr11	119167641	C	T	CBL	PB	1		ALL with alterations of ERG	SNV	missense		P684S
Zhang_2015	1120	SJPHALL020037	chr11	119169133	G	T	CBL	U	1		BCR-ABL1 ALL	SNV	missense		G773W
Zhang_2015	1120	SJEPD034	chr11	119169176	G	A	CBL	PB	1		Ependymoma	SNV	missense		R787H
Zhang_2015	1120	SJETV025	chr11	119169179	G	A	CBL	U	1		ETV6-RUNX1 ALL	SNV	missense		R788Q
Zhang_2015	1120	SJOS018	chr11	119170312	G	A	CBL	PB	1		Osteosarcoma	SNV	missense		A848T
Zhang_2015	1120	SJBALL021900	chr11	119170384	C	A	CBL	PB	1		iAmp21 ALL	SNV	missense		Q872K
Zhang_2015	1120	SJEPD025	chr1	193202215	G	C	CDC73	PB	1		Ependymoma	SNV	missense		G416A
Zhang_2015	1120	SJCBF013	chr1	193205402	G	A	CDC73	U	1		Core binding factor AML	SNV	missense		V445I
Zhang_2015	1120	SJMB016	chr16	68835713	G	A	CDH1	PB	1		Medulloblastoma	SNV	missense		A102T
Zhang_2015	1120	SJACT015	chr16	68835778	C	G	CDH1	PB	1		Adrenocortical Carcinoma	SNV	missense		H123Q
Zhang_2015	1120	SJEPD031	chr16	68842735	G	A	CDH1	U	1		Ependymoma	SNV	missense		R224H
Zhang_2015	1120	SJHYPER006	chr16	68845646	G	A	CDH1	U	1		Hyperdiploid ALL	SNV	missense		A298T
Zhang_2015	1120	SJE2A028	chr16	68846132	C	T	CDH1	PB	1		B-Lineage ALL E2A-PBX1 Subtype	SNV	missense		T368I
Zhang_2015	1120	SJHYPO013	chr16	68847376	A	G	CDH1	U	1		Hypodiploid ALL	SNV	missense		D433G
Zhang_2015	1120	SJBALL021893	chr16	68849506	C	T	CDH1	U	1		TCF3	SNV	missense		T470I
Zhang_2015	1120	SJERG006	chr16	68853301	A	G	CDH1	U	1		ALL with alterations of ERG	SNV	missense		T562A
Zhang_2015	1120	SJETV074	chr16	68857442	G	A	CDH1	PB	1		ETV6-RUNX1 ALL	SNV	missense		G693S
Zhang_2015	1120	SJNBL138	chr16	68862106	C	T	CDH1	U	1		Neuroblastoma	SNV	missense		R732W
Zhang_2015	1120	SJMB036	chr16	68863581	A	G	CDH1	U	1		Medulloblastoma	SNV	missense		R774G
Zhang_2015	1120	SJHYPO123	chr16	68863590	G	A	CDH1	U	1		Hypodiploid ALL	SNV	missense		D777N
Zhang_2015	1120	SJNBL001	chr16	68863674	G	A	CDH1	U	1		Neuroblastoma	SNV	missense		D805N
Zhang_2015	1120	SJBALL020	chr16	68867353	A	G	CDH1	PB	1		BALL	SNV	missense		N867S
Zhang_2015	1120	SJINF014	chr12	58143008	G	A	CDK4	PB	1		Infant ALL	SNV	missense		S259L
Zhang_2015	1120	SJEPD009	chr12	58143095	A	G	CDK4	PB	1		Ependymoma	SNV	missense		I230T
Zhang_2015	1120	SJEWS001302	chr12	58144446	G	A	CDK4	PB	1		Ewing's sarcoma	SNV	missense		R209C
Zhang_2015	1120	SJE2A006	chr12	58145346	C	T	CDK4	U	1		B-Lineage ALL E2A-PBX1 Subtype	SNV	missense		S52N
Zhang_2015	1120	SJHYPER117	chr12	58145392	C	T	CDK4	PB	1		Hyperdiploid ALL	SNV	missense		V37M
Zhang_2015	1120	SJE2A051	chr19	33792794	G	A	CEBPA	PB	1		B-Lineage ALL E2A-PBX1 Subtype	SNV	missense		A176V
Zhang_2015	1120	SJEWS010369	chr19	33792813	C	T	CEBPA	PB	1		Ewing's sarcoma	SNV	missense		A170T
Zhang_2015	1120	SJERG020300	chr19	33793259	C	T	CEBPA	PB	1		ALL with alterations of ERG	SNV	missense		S21N
Zhang_2015	1120	SJRHB036	chr14	95562369	G	A	DICER1	PB	1		Rhabdosarcoma	SNV	missense		R1630C
Zhang_2015	1120	SJE2A008	chr14	95562387	C	G	DICER1	PB	1		B-Lineage ALL E2A-PBX1 Subtype	SNV	missense		A1624P
Zhang_2015	1120	SJEPD011	chr14	95562462	G	C	DICER1	PB	1		Ependymoma	SNV	missense		R1599G
Zhang_2015	1120	SJHYPO047	chr14	95569882	C	G	DICER1	PB	1		Hypodiploid ALL	SNV	missense		G1284A
Zhang_2015	1120	SJNBL187	chr14	95569922	G	A	DICER1	PB	1		Neuroblastoma	SNV	missense		L1271F
Zhang_2015	1120	SJNBL151	chr14	95570057	C	T	DICER1	PB	1		Neuroblastoma	SNV	missense		E1226K
Zhang_2015	1120	SJHYPER023	chr14	95570215	G	A	DICER1	PB	1		Hyperdiploid ALL	SNV	missense		T1173I
Zhang_2015	1120	SJPHALL010	chr14	95574029	A	G	DICER1	PB	1		BCR-ABL1 ALL	SNV	missense		I907T
Zhang_2015	1120	SJHYPER016	chr14	95584058	C	G	DICER1	U	1		Hyperdiploid ALL	SNV	missense		E470D
Zhang_2015	1120	SJACT060	chr14	95584088	C	G	DICER1	U	1		Adrenocortical Carcinoma	SNV	missense		L460F
Zhang_2015	1120	SJRHB041	chr14	95598975	C	T	DICER1	PB	1		Rhabdosarcoma	SNV	missense		V62I
Zhang_2015	1120	SJPHALL020036	chr14	95598998	G	A	DICER1	PB	1		BCR-ABL1 ALL	SNV	missense		A54V
Zhang_2015	1120	SJERG016	chr2	47600631	G	A	EPCAM	PB	1		ALL with alterations of ERG	SNV	missense		V36I
Zhang_2015	1120	SJACT066	chr2	47601024	C	G	EPCAM	PB	1		Adrenocortical Carcinoma	SNV	missense		L88V
Zhang_2015	1120	SJCBF150	chr2	47602405	G	C	EPCAM	PB	1		Core binding factor AML	SNV	missense		R153T
Zhang_2015	1120	SJACT070	chr1	241661166	C	T	FH	PB	1		Adrenocortical Carcinoma	SNV	missense		E499K
Zhang_2015	1120	SJLGG006	chr1	241661187	G	C	FH	PB	1		Low Grade Glioma	SNV	missense		L492V
Zhang_2015	1120	SJEPD035	chr1	241661246	G	T	FH	U	1		Ependymoma	SNV	missense		A472D
Zhang_2015	1120	SJPHALL020037	chr1	241665767	C	A	FH	U	1		BCR-ABL1 ALL	SNV	missense		E404D
Zhang_2015	1120	SJETV190	chr1	241672061	C	T	FH	U	1		ETV6-RUNX1 ALL	SNV	missense		A194T
Zhang_2015	1120	SJOS001105	chr1	241675301	G	C	FH	U	1		Osteosarcoma	SNV	missense		P174R
Zhang_2015	1120	SJHGG057	chr1	241676923	T	C	FH	U	1		High Grade Glioma	SNV	missense		I120V
Zhang_2015	1120	SJEWS001320	chr1	241676979	C	T	FH	U	1		Ewing's sarcoma	SNV	missense		R101Q
Zhang_2015	1120	SJNBL135	chr1	241680527	T	A	FH	U	1		Neuroblastoma	SNV	missense		R74S
Zhang_2015	1120	SJBALL021898	chr1	241682946	G	A	FH	PB	1		BALL	SNV	missense		P26L
Zhang_2015	1120	SJNBL177	chr1	241682946	G	A	FH	PB	1		Neuroblastoma	SNV	missense		P26L
Zhang_2015	1120	SJE2A025	chr1	241683016	G	C	FH	PB	1		B-Lineage ALL E2A-PBX1 Subtype	SNV	missense		R3G
Zhang_2015	1120	SJNBL046	chr1	241683016	G	C	FH	PB	1		Neuroblastoma	SNV	missense		R3G
Zhang_2015	1120	SJINF011	chr3	128200031	G	A	GATA2	PB	1		Infant ALL	SNV	missense		S425L
Zhang_2015	1120	SJINF010	chr3	128204624	C	T	GATA2	U	1		Infant ALL	SNV	missense		G273R
Zhang_2015	1120	SJACT070	chr3	128204996	C	T	GATA2	PB	1		Adrenocortical Carcinoma	SNV	missense		G149R
Zhang_2015	1120	SJERG020053	chr3	128204996	C	T	GATA2	PB	1		ALL with alterations of ERG	SNV	missense		G149R
Zhang_2015	1120	SJMLL016	chr3	128205693	G	A	GATA2	PB	1		Mixed Lineage Leukemia	SNV	missense		A61V
Zhang_2015	1120	SJINF002	chr3	128205808	C	A	GATA2	U	1		Infant ALL	SNV	missense		D23Y
Zhang_2015	1120	SJEPD001510	chr11	533799	T	G	HRAS	U	1		Ependymoma	SNV	missense		N86T
Zhang_2015	1120	SJEWS001308	chr12	25368380	T	G	KRAS	PB	1		Ewing's sarcoma	SNV	missense		M189L
Zhang_2015	1120	SJNBL045	chr12	25368380	T	G	KRAS	PB	1		Neuroblastoma	SNV	missense		M189L
Zhang_2015	1120	SJCBF003	chr12	25368405	A	T	KRAS	U	1		Core binding factor AML	SNV	nonsense		C180*
Zhang_2015	1120	SJINF020031	chr19	4097323	C	T	MAP2K2	U	1		Infant ALL	SNV	missense		R313Q
Zhang_2015	1120	SJINF020032	chr19	4097323	C	T	MAP2K2	U	1		Infant ALL	SNV	missense		R313Q
Zhang_2015	1120	SJAMLM7066	chr19	4099225	G	A	MAP2K2	PB	1		Acute megakaryoblastic leukemia	SNV	missense		P298L
Zhang_2015	1120	SJINF034	chr19	4099312	G	A	MAP2K2	PB	1		Infant ALL	SNV	missense		P269L
Zhang_2015	1120	SJEPD001505	chr19	4099354	A	G	MAP2K2	U	1		Ependymoma	SNV	missense		L255P
Zhang_2015	1120	SJLGG029	chr19	4102411	C	A	MAP2K2	U	1		Low Grade Glioma	SNV	missense		R164M
Zhang_2015	1120	SJE2A002	chr11	64572131	C	T	MEN1	PB	1		B-Lineage ALL E2A-PBX1 Subtype	SNV	missense		G503D
Zhang_2015	1120	SJE2A028	chr11	64572131	C	T	MEN1	PB	1		B-Lineage ALL E2A-PBX1 Subtype	SNV	missense		G503D
Zhang_2015	1120	SJTALL065	chr11	64575451	T	C	MEN1	PB	1		T-cell ALL	SNV	missense		N189S
Zhang_2015	1120	SJPHALL006	chr3	37035075	G	A	MLH1	PB	1		BCR-ABL1 ALL	SNV	missense		E13K
Zhang_2015	1120	SJHYPER023	chr3	37035090	C	T	MLH1	PB	1		Hyperdiploid ALL	SNV	missense		R18C
Zhang_2015	1120	SJTALL007	chr3	37035090	C	T	MLH1	PB	1		T-cell ALL	SNV	missense		R18C
Zhang_2015	1120	SJHGG052	chr3	37035103	G	C	MLH1	PB	1		High Grade Glioma	SNV	missense		G22A
Zhang_2015	1120	SJHYPO110	chr3	37059000	G	A	MLH1	PB	1		Hypodiploid ALL	SNV	missense		R265H
Zhang_2015	1120	SJE2A010	chr3	37061895	C	G	MLH1	PB	1		B-Lineage ALL E2A-PBX1 Subtype	SNV	missense		Q327E
Zhang_2015	1120	*SJMB034	chr3	37061907	G	A	MLH1	U	1		Medulloblastoma	SNV	missense		E331K
Zhang_2015	1120	SJHYPO147	chr3	37067206	G	A	MLH1	B	1		Hypodiploid ALL	SNV	missense		G373R
Zhang_2015	1120	SJAMLM7010475	chr3	37067240	T	A	MLH1	PB	1		Acute megakaryoblastic leukemia	SNV	missense		V384D
Zhang_2015	1120	SJMB032	chr3	37067240	T	A	MLH1	PB	1		Medulloblastoma	SNV	missense		V384D
Zhang_2015	1120	SJAMLM7006	chr3	37067410	G	A	MLH1	B	1		Acute megakaryoblastic leukemia	SNV	missense		A441T
Zhang_2015	1120	SJNBL134	chr3	37067410	G	A	MLH1	B	1		Neuroblastoma	SNV	missense		A441T
Zhang_2015	1120	SJRHB027	chr3	37089168	T	G	MLH1	PB	1		Rhabdosarcoma	SNV	missense		I630M
Zhang_2015	1120	SJCBF021	chr3	37090048	A	G	MLH1	U	1		Core binding factor AML	SNV	missense		Y646C
Zhang_2015	1120	SJHYPER117	chr3	37090456	A	G	MLH1	U	1		Hyperdiploid ALL	SNV	missense		Y684C
Zhang_2015	1120	SJBALL020570	chr3	37090471	A	G	MLH1	PB	1		iAmp21 ALL	SNV	missense		Q689R
Zhang_2015	1120	SJTALL081	chr3	37092024	A	T	MLH1	PB	1		T-cell ALL	SNV	missense		E717D
Zhang_2015	1120	SJETV032	chr3	37092035	A	G	MLH1	PB	1		ETV6-RUNX1 ALL	SNV	missense		Y721C
Zhang_2015	1120	SJMEL001001	chr2	47630334	G	A	MSH2	U	1		Melanoma	SNV	missense		A2T
Zhang_2015	1120	SJACT065	chr2	47630353	C	T	MSH2	B	1		Adrenocortical Carcinoma	SNV	missense		T8M
Zhang_2015	1120	SJCBF116	chr2	47630353	C	T	MSH2	B	1		Core binding factor AML	SNV	missense		T8M
Zhang_2015	1120	SJCBF137	chr2	47630353	C	T	MSH2	B	1		Core binding factor AML	SNV	missense		T8M
Zhang_2015	1120	SJINF014	chr2	47630353	C	T	MSH2	B	1		Infant ALL	SNV	missense		T8M
Zhang_2015	1120	SJNBL002	chr2	47630353	C	T	MSH2	B	1		Neuroblastoma	SNV	missense		T8M
Zhang_2015	1120	SJRHB007	chr2	47630427	A	C	MSH2	PB	1		Rhabdosarcoma	SNV	missense		T33P
Zhang_2015	1120	SJHYPO041	chr2	47630458	A	G	MSH2	U	1		Hypodiploid ALL	SNV	missense		Y43C
Zhang_2015	1120	SJEPD001510	chr2	47635681	A	G	MSH2	PB	1		Ependymoma	SNV	missense		Y118C
Zhang_2015	1120	SJNBL195	chr2	47637301	T	G	MSH2	B	1		Neuroblastoma	SNV	missense		I145M
Zhang_2015	1120	SJPHALL015	chr2	47637301	T	G	MSH2	B	1		BCR-ABL1 ALL	SNV	missense		I145M
Zhang_2015	1120	SJRHB028	chr2	47637423	A	G	MSH2	U	1		Rhabdosarcoma	SNV	missense		N186S
Zhang_2015	1120	SJPHALL020045	chr2	47643436	G	T	MSH2	U	1		BCR-ABL1 ALL	SNV	missense		G315V
Zhang_2015	1120	SJLGG020	chr2	47643524	G	C	MSH2	U	1		Low Grade Glioma	SNV	missense		Q344H
Zhang_2015	1120	SJMLL002	chr2	47656891	G	T	MSH2	U	1		Mixed Lineage Leukemia	SNV	missense		V363L
Zhang_2015	1120	SJPHALL018	chr2	47656972	C	T	MSH2	B	1		BCR-ABL1 ALL	SNV	missense		L390F
Zhang_2015	1120	SJBALL020882	chr2	47672757	G	C	MSH2	PB	1		PH-LIKE	SNV	missense		K449N
Zhang_2015	1120	SJBALL021434	chr2	47702191	A	G	MSH2	PB	1		ALL with alterations of ERG	SNV	missense		N596S
Zhang_2015	1120	SJHYPO019	chr2	47702194	A	C	MSH2	PB	1		Hypodiploid ALL	SNV	missense		D597A
Zhang_2015	1120	SJHYPO114	chr2	47702208	C	G	MSH2	U	1		Hypodiploid ALL	SNV	missense		L602V
Zhang_2015	1120	SJETV077	chr2	47702251	C	G	MSH2	U	1		ETV6-RUNX1 ALL	SNV	missense		P616R
Zhang_2015	1120	SJPHALL020040	chr2	47702251	C	G	MSH2	U	1		BCR-ABL1 ALL	SNV	missense		P616R
Zhang_2015	1120	SJNBL137	chr2	47702290	A	G	MSH2	PB	1		Neuroblastoma	SNV	missense		Q629R
Zhang_2015	1120	SJOS011	chr2	47705488	C	T	MSH2	U	1		Osteosarcoma	SNV	missense		A763V
Zhang_2015	1120	SJEWS001318	chr2	47705577	C	G	MSH2	PB	1		Ewing's sarcoma	SNV	missense		Q793E
Zhang_2015	1120	SJHYPER206	chr2	47709997	C	G	MSH2	B	1		Hyperdiploid ALL	SNV	missense		T905R
Zhang_2015	1120	SJHGG073	chr2	48010388	A	C	MSH6	U	1		High Grade Glioma	SNV	missense		T6P
Zhang_2015	1120	SJHYPER017	chr2	48018139	A	G	MSH6	B	1		Hyperdiploid ALL	SNV	missense		N112D
Zhang_2015	1120	SJEWS010369	chr2	48023120	C	T	MSH6	B	1		Ewing's sarcoma	SNV	missense		A182V
Zhang_2015	1120	SJINF018	chr2	48025772	A	G	MSH6	B	1		Infant ALL	SNV	missense		D217G
Zhang_2015	1120	SJHGG090	chr2	48025849	C	T	MSH6	B	1		High Grade Glioma	SNV	missense		R243C
Zhang_2015	1120	SJINF012	chr2	48025988	G	A	MSH6	B	1		Infant ALL	SNV	missense		G289D
Zhang_2015	1120	SJTALL012	chr2	48026015	G	A	MSH6	B	1		T-cell ALL	SNV	missense		R298Q
Zhang_2015	1120	SJE2A009	chr2	48026064	C	G	MSH6	B	1		B-Lineage ALL E2A-PBX1 Subtype	SNV	missense		S314R
Zhang_2015	1120	SJERG020	chr2	48026183	G	T	MSH6	B	1		ALL with alterations of ERG	SNV	missense		G354V
Zhang_2015	1120	SJCBF145	chr2	48026284	C	G	MSH6	B	1		Core binding factor AML	SNV	missense		H388D
Zhang_2015	1120	SJCBF152	chr2	48026780	C	T	MSH6	B	1		Core binding factor AML	SNV	missense		T553I
Zhang_2015	1120	SJHYPER116	chr2	48026966	G	C	MSH6	B	1		Hyperdiploid ALL	SNV	missense		C615S
Zhang_2015	1120	SJNBL027	chr2	48026989	C	G	MSH6	U	1		Neuroblastoma	SNV	missense		P623A
Zhang_2015	1120	SJPHALL009	chr2	48026989	C	G	MSH6	U	1		BCR-ABL1 ALL	SNV	missense		P623A
Zhang_2015	1120	SJPHALL028	chr2	48027295	A	G	MSH6	B	1		BCR-ABL1 ALL	SNV	missense		I725V
Zhang_2015	1120	SJACT015	chr2	48027325	C	A	MSH6	PB	1		Adrenocortical Carcinoma	SNV	missense		L735I
Zhang_2015	1120	SJCBF029	chr2	48027746	T	C	MSH6	U	1		Core binding factor AML	SNV	missense		M875T
Zhang_2015	1120	SJMB034	chr2	48030589	G	A	MSH6	U	1		Medulloblastoma	SNV	missense		R1068Q
Zhang_2015	1120	SJERG031	chr2	48033673	C	T	MSH6	U	1		ALL with alterations of ERG	SNV	missense		P1295L
Zhang_2015	1120	SJBALL204	chr2	48033690	A	G	MSH6	PB	1		BALL	SNV	missense		N1301D
Zhang_2015	1120	SJCBF103	chr2	48033766	T	G	MSH6	B	1		Core binding factor AML	SNV	missense		M1326R
Zhang_2015	1120	SJAMLM7066	chr2	48033988	-	GATT	MSH6	B	1		Acute megakaryoblastic leukemia	SNV	frameshift		K1358fs
Zhang_2015	1120	SJPHALL018	chr2	48033988	-	GATT	MSH6	B	1		BCR-ABL1 ALL	SNV	frameshift		K1358fs
Zhang_2015	1120	SJPHALL020037	chr2	48033988	-	GATT	MSH6	B	1		BCR-ABL1 ALL	SNV	frameshift		K1358fs
Zhang_2015	1120	SJACT065	chr17	29490381	C	T	NF1	U	1		Adrenocortical Carcinoma	SNV	missense		R156C
Zhang_2015	1120	SJOS001112	chr17	29527474	C	G	NF1	PB	1		Osteosarcoma	SNV	missense		A308G
Zhang_2015	1120	SJEPD034	chr17	29559153	C	G	NF1	U	1		Ependymoma	SNV	missense		P1087R
Zhang_2015	1120	SJE2A005	chr17	29559774	G	A	NF1	PB	1		B-Lineage ALL E2A-PBX1 Subtype	SNV	missense		S1124N
Zhang_2015	1120	SJEPD034	chr17	29559845	G	T	NF1	U	1		Ependymoma	SNV	missense		A1148S
Zhang_2015	1120	SJOS012	chr17	29587415	C	T	NF1	PB	1		Osteosarcoma	SNV	missense		P1466S
Zhang_2015	1120	SJEPD001519	chr17	29587482	G	A	NF1	U	1		Ependymoma	SNV	missense		R1488H
Zhang_2015	1120	SJE2A023	chr17	29661949	A	T	NF1	PB	1		B-Lineage ALL E2A-PBX1 Subtype	SNV	missense		Q1948L
Zhang_2015	1120	SJBALL247	chr17	29667607	G	T	NF1	PB	1		PH-LIKE	SNV	missense		A2315S
Zhang_2015	1120	SJHGG035	chr17	29677318	A	G	NF1	PB	1		High Grade Glioma	SNV	missense		H2459R
Zhang_2015	1120	SJBALL021894	chr17	29685568	A	G	NF1	PB	1		BALL	SNV	missense		I2660V
Zhang_2015	1120	SJCBF112	chr17	29685584	A	G	NF1	U	1		Core binding factor AML	SNV	missense		Q2665R
Zhang_2015	1120	SJRHB003	chr17	29701147	C	T	NF1	U	1		Rhabdosarcoma	SNV	missense		R2811C
Zhang_2015	1120	SJRHB013	chr17	29701150	A	C	NF1	PB	1		Rhabdosarcoma	SNV	missense		N2812H
Zhang_2015	1120	*SJHGG115	chr22	30067870	C	T	NF2	U	1		High Grade Glioma	SNV	missense		T352M
Zhang_2015	1120	SJHYPO047	chr22	30069399	G	A	NF2	U	1		Hypodiploid ALL	SNV	missense		E422K
Zhang_2015	1120	SJHYPER010	chr22	30077492	G	A	NF2	U	1		Hyperdiploid ALL	SNV	missense		E547K
Zhang_2015	1120	SJCBF094	chr1	115251265	TCT	-	NRAS	U	1		Core binding factor AML	SNV	proteinDel		E153_D154>D
Zhang_2015	1120	SJNBL025	chr1	115256461	T	C	NRAS	PB	1		Neuroblastoma	SNV	missense		I84V
Zhang_2015	1120	SJCBF016	chr16	23614908	C	T	PALB2	PB	1		Core binding factor AML	SNV	missense		G1145S
Zhang_2015	1120	SJRHB001	chr16	23614937	C	T	PALB2	U	1		Rhabdosarcoma	SNV	missense		G1135E
Zhang_2015	1120	SJHYPO120	chr16	23619286	C	G	PALB2	U	1		Hypodiploid ALL	SNV	missense		E1083D
Zhang_2015	1120	SJNBL008	chr16	23619288	C	T	PALB2	U	1		Neuroblastoma	SNV	missense		E1083K
Zhang_2015	1120	SJOS001108M1	chr16	23625380	A	G	PALB2	U	1		Osteosarcoma	SNV	missense		M1049T
Zhang_2015	1120	SJNBL010	chr16	23641589	G	A	PALB2	PB	1		Neuroblastoma	SNV	missense		S629F
Zhang_2015	1120	SJBALL020516	chr16	23646220	G	T	PALB2	U	1		iAmp21 ALL	SNV	missense		H549Q
Zhang_2015	1120	SJRB020	chr16	23646551	C	A	PALB2	U	1		Retinoblastoma	SNV	missense		G439V
Zhang_2015	1120	SJAMLM7010475	chr16	23646686	T	A	PALB2	U	1		Acute megakaryoblastic leukemia	SNV	missense		H394L
Zhang_2015	1120	SJETV002	chr16	23646785	G	C	PALB2	PB	1		ETV6-RUNX1 ALL	SNV	missense		T361S
Zhang_2015	1120	SJETV002	chr16	23646806	G	C	PALB2	PB	1		ETV6-RUNX1 ALL	SNV	missense		S354C
Zhang_2015	1120	SJEWS010375	chr16	23647125	C	G	PALB2	PB	1		Ewing's sarcoma	SNV	missense		V248L
Zhang_2015	1120	SJE2A057	chr16	23647482	G	A	PALB2	PB	1		B-Lineage ALL E2A-PBX1 Subtype	SNV	missense		P129S
Zhang_2015	1120	SJRHB048	chr9	36882052	G	T	PAX5	U	1		Rhabdosarcoma	SNV	missense		P321T
Zhang_2015	1120	SJHYPER043	chr9	37002723	C	G	PAX5	U	1		Hyperdiploid ALL	SNV	missense		G176R
Zhang_2015	1120	SJMB032	chr9	37034023	A	T	PAX5	PB	1		Medulloblastoma	SNV	missense		D2E
Zhang_2015	1120	SJHYPER011	chr4	41747904	C	T	PHOX2B	PB	1		Hyperdiploid ALL	SNV	missense		G289S
Zhang_2015	1120	SJHGG053	chr7	6026966	G	T	PMS2	B	1		High Grade Glioma	SNV	missense		S477Y
Zhang_2015	1120	SJOS001107	chr7	6026976	C	A	PMS2	B	1		Osteosarcoma	SNV	missense		A474S
Zhang_2015	1120	SJAMLM7010480	chr7	6027153	C	T	PMS2	B	1		Acute megakaryoblastic leukemia	SNV	missense		V415M
Zhang_2015	1120	SJHYPO020	chr7	6031656	C	T	PMS2	B	1		Hypodiploid ALL	SNV	missense		M312I
Zhang_2015	1120	SJBALL160	chr7	6038797	C	A	PMS2	PB	1		BALL	SNV	missense		C216F
Zhang_2015	1120	SJETV069	chr7	6043423	G	C	PMS2	B	1		ETV6-RUNX1 ALL	SNV	missense		T84S
Zhang_2015	1120	*SJHYPO024	chr7	6043673	G	C	PMS2	B	1		Hypodiploid ALL	SNV	missense		D60E
Zhang_2015	1120	SJHYPER143	chr7	6045598	G	T	PMS2	U	1		Hyperdiploid ALL	SNV	missense		Q30K
Zhang_2015	1120	SJCPC001015	chr7	6045600	C	G	PMS2	U	1		Choroid Plexus Carcinoma	SNV	missense		G29A
Zhang_2015	1120	SJOS013	chr7	6045600	C	G	PMS2	U	1		Osteosarcoma	SNV	missense		G29A
Zhang_2015	1120	SJEWS001304	chr17	66520162	T	C	PRKAR1A	U	1		Ewing's sarcoma	SNV	missense		I149T
Zhang_2015	1120	SJERG021	chr17	66526468	C	T	PRKAR1A	PB	1		ALL with alterations of ERG	SNV	missense		R342C
Zhang_2015	1120	SJHGG029	chr17	66526468	C	T	PRKAR1A	PB	1		High Grade Glioma	SNV	missense		R342C
Zhang_2015	1120	SJBALL231	chr9	98209214	G	A	PTCH1	PB	1		PH-LIKE	SNV	missense		R1441W
Zhang_2015	1120	SJHGG094	chr9	98209286	C	T	PTCH1	PB	1		High Grade Glioma	SNV	missense		V1417I
Zhang_2015	1120	SJACT026	chr9	98209289	G	T	PTCH1	PB	1		Adrenocortical Carcinoma	SNV	missense		H1416N
Zhang_2015	1120	SJAMLM7011	chr9	98209490	G	A	PTCH1	U	1		Acute megakaryoblastic leukemia	SNV	missense		R1349W
Zhang_2015	1120	SJPHALL020	chr9	98209619	G	A	PTCH1	PB	1		BCR-ABL1 ALL	SNV	missense		P1306S
Zhang_2015	1120	SJINF011	chr9	98209649	G	A	PTCH1	PB	1		Infant ALL	SNV	missense		R1296W
Zhang_2015	1120	SJEPD001502	chr9	98209652	C	A	PTCH1	U	1		Ependymoma	SNV	nonsense		G1295*
Zhang_2015	1120	SJERG010	chr9	98209652	C	T	PTCH1	U	1		ALL with alterations of ERG	SNV	missense		G1295R
Zhang_2015	1120	SJACT025	chr9	98211463	A	G	PTCH1	PB	1		Adrenocortical Carcinoma	SNV	missense		V1230A
Zhang_2015	1120	SJPHALL002	chr9	98211541	A	G	PTCH1	U	1		BCR-ABL1 ALL	SNV	missense		V1204A
Zhang_2015	1120	SJCBF149	chr9	98218614	C	A	PTCH1	U	1		Core binding factor AML	SNV	missense		V1083F
Zhang_2015	1120	SJACT065	chr9	98224163	C	T	PTCH1	U	1		Adrenocortical Carcinoma	SNV	missense		R892H
Zhang_2015	1120	SJHYPER085	chr9	98224164	G	A	PTCH1	PB	1		Hyperdiploid ALL	SNV	missense		R892C
Zhang_2015	1120	SJHGG117	chr9	98229461	T	C	PTCH1	PB	1		High Grade Glioma	SNV	missense		M832V
Zhang_2015	1120	SJNBL137	chr9	98229479	T	C	PTCH1	U	1		Neuroblastoma	SNV	missense		S826G
Zhang_2015	1120	SJBALL021333	chr9	98231104	A	G	PTCH1	PB	1		ALL with alterations of ERG	SNV	missense		C726R
Zhang_2015	1120	SJHGG102	chr9	98231111	C	G	PTCH1	PB	1		High Grade Glioma	SNV	missense		E723D
Zhang_2015	1120	SJERG007	chr9	98231268	G	A	PTCH1	U	1		ALL with alterations of ERG	SNV	missense		T671M
Zhang_2015	1120	SJOS001105	chr9	98231370	C	T	PTCH1	PB	1		Osteosarcoma	SNV	missense		R637H
Zhang_2015	1120	SJLGG015	chr9	98231373	G	A	PTCH1	PB	1		Low Grade Glioma	SNV	missense		T636I
Zhang_2015	1120	SJMB035	chr9	98238383	C	T	PTCH1	PB	1		Medulloblastoma	SNV	missense		S553N
Zhang_2015	1120	SJMLL020	chr9	98239941	T	C	PTCH1	PB	1		Mixed Lineage Leukemia	SNV	missense		K463R
Zhang_2015	1120	SJCBF016	chr9	98240378	C	T	PTCH1	PB	1		Core binding factor AML	SNV	missense		D435N
Zhang_2015	1120	SJOS001123	chr9	98240378	C	T	PTCH1	PB	1		Osteosarcoma	SNV	missense		D435N
Zhang_2015	1120	SJERG016	chr9	98240437	G	C	PTCH1	PB	1		ALL with alterations of ERG	SNV	missense		T415S
Zhang_2015	1120	SJCBF139	chr9	98240450	C	T	PTCH1	U	1		Core binding factor AML	SNV	missense		A411T
Zhang_2015	1120	SJCBF035	chr9	98241314	T	C	PTCH1	PB	1		Core binding factor AML	SNV	missense		I394V
Zhang_2015	1120	SJNBL137	chr9	98242716	C	T	PTCH1	U	1		Neuroblastoma	SNV	missense		D300N
Zhang_2015	1120	SJACT017	chr9	98244250	A	G	PTCH1	PB	1		Adrenocortical Carcinoma	SNV	missense		S242P
Zhang_2015	1120	SJBALL087	chr9	98244250	A	G	PTCH1	PB	1		ALL with alterations of ERG	SNV	missense		S242P
Zhang_2015	1120	SJETV041	chr9	98248052	C	T	PTCH1	PB	1		ETV6-RUNX1 ALL	SNV	missense		A166T
Zhang_2015	1120	SJTALL002	chr10	89690828	G	A	PTEN	U	1		T-cell ALL	SNV	missense		A79T
Zhang_2015	1120	SJBALL271	chr10	89692866	A	G	PTEN	PB	1		BALL	SNV	missense		N117S
Zhang_2015	1120	SJERG002	chr10	89720711	G	A	PTEN	PB	1		ALL with alterations of ERG	SNV	missense		E288K
Zhang_2015	1120	SJNBL157	chr10	89720731	T	G	PTEN	PB	1		Neuroblastoma	SNV	missense		S294R
Zhang_2015	1120	SJNBL026	chr10	89725078	C	A	PTEN	U	1		Neuroblastoma	SNV	missense		P354Q
Zhang_2015	1120	SJBALL021081	chr12	112888163	G	T	PTPN11	U	1		ALL with alterations of ERG	SNV	missense		G60V
Zhang_2015	1120	SJETV095	chr12	112915461	A	C	PTPN11	U	1		ETV6-RUNX1 ALL	SNV	missense		H287P
Zhang_2015	1120	SJEPD026	chr12	112915523	A	G	PTPN11	U	1		Ependymoma	SNV	missense		N308D
Zhang_2015	1120	SJHYPO036	chr12	112926887	G	C	PTPN11	U	1		Hypodiploid ALL	SNV	missense		G503R
Zhang_2015	1120	SJERG030	chr12	112940006	C	T	PTPN11	PB	1		ALL with alterations of ERG	SNV	missense		T553M
Zhang_2015	1120	SJEWS001312	chr12	112940006	C	T	PTPN11	PB	1		Ewing's sarcoma	SNV	missense		T553M
Zhang_2015	1120	SJNBL190	chr12	112940006	C	T	PTPN11	PB	1		Neuroblastoma	SNV	missense		T553M
Zhang_2015	1120	SJOS001103	chr12	112940006	C	T	PTPN11	PB	1		Osteosarcoma	SNV	missense		T553M
Zhang_2015	1120	SJTALL070	chr12	112940006	C	T	PTPN11	PB	1		T-cell ALL	SNV	missense		T553M
Zhang_2015	1120	SJEWS010425	chr12	112940026	C	T	PTPN11	U	1		Ewing's sarcoma	SNV	missense		L560F
Zhang_2015	1120	SJNBL032	chr3	12626032	G	A	RAF1	PB	1		Neuroblastoma	SNV	missense		P643L
Zhang_2015	1120	SJCBF014	chr3	12626428	T	C	RAF1	U	1		Core binding factor AML	SNV	missense		Y574C
Zhang_2015	1120	SJERG022	chr3	12653557	T	C	RAF1	U	1		ALL with alterations of ERG	SNV	missense		N71S
Zhang_2015	1120	SJMB024	chr3	12653557	T	C	RAF1	U	1		Medulloblastoma	SNV	missense		N71S
Zhang_2015	1120	SJETV003	chr3	12660097	C	T	RAF1	PB	1		ETV6-RUNX1 ALL	SNV	missense		A42T
Zhang_2015	1120	SJHYPO014	chr3	12660097	C	T	RAF1	PB	1		Hypodiploid ALL	SNV	missense		A42T
Zhang_2015	1120	SJCBF118	chr3	12660102	C	T	RAF1	PB	1		Core binding factor AML	SNV	missense		R40H
Zhang_2015	1120	SJMB024	chr3	12660102	C	T	RAF1	PB	1		Medulloblastoma	SNV	missense		R40H
Zhang_2015	1120	SJMB024	chr3	12660103	G	A	RAF1	U	1		Medulloblastoma	SNV	missense		R40C
Zhang_2015	1120	SJTALL007	chr3	12660127	T	C	RAF1	PB	1		T-cell ALL	SNV	missense		I32V
Zhang_2015	1120	SJHGG115	chr13	48878100	G	T	RB1	PB	1		High Grade Glioma	SNV	missense		A18S
Zhang_2015	1120	SJEWS001319	chr13	48881516	A	G	RB1	PB	1		Ewing's sarcoma	SNV	missense		K80E
Zhang_2015	1120	SJPHALL020045	chr13	48916813	T	C	RB1	U	1		BCR-ABL1 ALL	SNV	missense		F115L
Zhang_2015	1120	SJNBL040	chr13	49030387	G	A	RB1	U	1		Neuroblastoma	SNV	missense		R621H
Zhang_2015	1120	SJMB035	chr13	49039407	C	T	RB1	U	1		Medulloblastoma	SNV	missense		R798W
Zhang_2015	1120	*SJTALL009	chr13	49050882	G	A	RB1	U	1		T-cell ALL	SNV	missense		D856N
Zhang_2015	1120	SJNBL044	chr13	49050882	G	A	RB1	U	1		Neuroblastoma	SNV	missense		D856N
Zhang_2015	1120	SJACT065	chr13	49050886	G	A	RB1	U	1		Adrenocortical Carcinoma	SNV	missense		R857H
Zhang_2015	1120	SJBALL020595	chr10	43596011	C	A	RET	U	1		ALL with alterations of ERG	SNV	missense		P60T
Zhang_2015	1120	SJPHALL004	chr10	43597793	G	A	RET	U	1		BCR-ABL1 ALL	SNV	missense		R114H
Zhang_2015	1120	SJBALL021893	chr10	43597813	G	A	RET	PB	1		TCF3	SNV	missense		V121I
Zhang_2015	1120	SJAMLM7010480	chr10	43602008	T	A	RET	PB	1		Acute megakaryoblastic leukemia	SNV	missense		V351E
Zhang_2015	1120	SJHGG041	chr10	43604539	T	A	RET	U	1		High Grade Glioma	SNV	missense		L375Q
Zhang_2015	1120	SJTALL065	chr10	43604539	T	A	RET	U	1		T-cell ALL	SNV	missense		L375Q
Zhang_2015	1120	SJCBF137	chr10	43607553	C	T	RET	U	1		Core binding factor AML	SNV	missense		A510V
Zhang_2015	1120	SJHGG070	chr10	43608351	G	A	RET	U	1		High Grade Glioma	SNV	missense		D567N
Zhang_2015	1120	SJETV079	chr10	43609969	G	T	RET	U	1		ETV6-RUNX1 ALL	SNV	missense		A641S
Zhang_2015	1120	SJHYPO055	chr10	43610044	A	G	RET	U	1		Hypodiploid ALL	SNV	missense		K666E
Zhang_2015	1120	SJMB008	chr10	43610177	A	G	RET	U	1		Medulloblastoma	SNV	missense		K710R
Zhang_2015	1120	SJEPD033	chr10	43620373	A	C	RET	U	1		Ependymoma	SNV	missense		K994N
Zhang_2015	1120	SJBALL264	chr10	43622095	A	G	RET	U	1		BALL	SNV	missense		T1038A
Zhang_2015	1120	SJCBF022	chr10	43622122	C	T	RET	U	1		Core binding factor AML	SNV	missense		P1047S
Zhang_2015	1120	SJERG020299	chr10	43622125	C	T	RET	U	1		ALL with alterations of ERG	SNV	missense		L1048F
Zhang_2015	1120	SJAMLM7010475	chr21	36164799	G	C	RUNX1	U	1		Acute megakaryoblastic leukemia	SNV	missense		P359R
Zhang_2015	1120	SJMLL017	chr21	36206711	C	T	RUNX1	PB	1		Mixed Lineage Leukemia	SNV	missense		M240I
Zhang_2015	1120	SJRHB037	chr21	36206814	C	T	RUNX1	PB	1		Rhabdosarcoma	SNV	missense		R233H
Zhang_2015	1120	SJBALL271	chr21	36206844	T	C	RUNX1	U	1		BALL	SNV	missense		E223G
Zhang_2015	1120	SJBALL021372	chr21	36259336	A	T	RUNX1	PB	1		ALL with alterations of ERG	SNV	missense		M25K
Zhang_2015	1120	SJHYPO040	chr21	36259336	A	T	RUNX1	U	1		Hypodiploid ALL	SNV	missense		M25K
Zhang_2015	1120	SJEWS010420	chr21	36265249	C	G	RUNX1	PB	1		Ewing's sarcoma	SNV	missense		G24R
Zhang_2015	1120	SJE2A012	chr11	61205157	C	T	SDHAF2	U	1		B-Lineage ALL E2A-PBX1 Subtype	SNV	missense		R33C
Zhang_2015	1120	SJCBF124	chr11	61205528	T	A	SDHAF2	U	1		Core binding factor AML	SNV	missense		Y105N
Zhang_2015	1120	SJHGG073	chr18	48581289	C	G	SMAD4	U	1		High Grade Glioma	SNV	missense		P198R
Zhang_2015	1120	SJMB016	chr18	48586278	A	G	SMAD4	PB	1		Medulloblastoma	SNV	missense		N316S
Zhang_2015	1120	SJLGG028	chr19	11096934	G	T	SMARCA4	PB	1		Low Grade Glioma	SNV	missense		G142V
Zhang_2015	1120	SJOS001125	chr19	11097174	C	T	SMARCA4	PB	1		Osteosarcoma	SNV	missense		P222L
Zhang_2015	1120	SJERG020051	chr19	11098558	G	A	SMARCA4	PB	1		ALL with alterations of ERG	SNV	missense		R359Q
Zhang_2015	1120	SJINF039	chr19	11098558	G	A	SMARCA4	PB	1		Infant ALL	SNV	missense		R359Q
Zhang_2015	1120	SJLGG028	chr19	11098558	G	A	SMARCA4	PB	1		Low Grade Glioma	SNV	missense		R359Q
Zhang_2015	1120	SJNBL176	chr19	11098558	G	A	SMARCA4	PB	1		Neuroblastoma	SNV	missense		R359Q
Zhang_2015	1120	SJEWS001316	chr19	11100006	A	G	SMARCA4	U	1		Ewing's sarcoma	SNV	missense		I378V
Zhang_2015	1120	SJBALL204	chr19	11106989	C	T	SMARCA4	U	1		BALL	SNV	missense		T565M
Zhang_2015	1120	SJNBL124	chr19	11152085	A	T	SMARCA4	PB	1		Neuroblastoma	SNV	missense		T1425S
Zhang_2015	1120	SJCBF097	chr19	11169515	G	A	SMARCA4	PB	1		Core binding factor AML	SNV	missense		V1529I
Zhang_2015	1120	SJMB009	chr2	39213258	G	C	SOS1	U	1		Medulloblastoma	SNV	missense		P1237A
Zhang_2015	1120	SJOS013	chr2	39222324	A	T	SOS1	PB	1		Osteosarcoma	SNV	missense		S1096T
Zhang_2015	1120	SJEPD001506	chr2	39224178	C	T	SOS1	PB	1		Ependymoma	SNV	missense		R989K
Zhang_2015	1120	SJCBF107	chr2	39239286	G	A	SOS1	U	1		Core binding factor AML	SNV	missense		L791F
Zhang_2015	1120	SJHYPER009	chr2	39241981	T	C	SOS1	PB	1		Hyperdiploid ALL	SNV	missense		N622S
Zhang_2015	1120	SJACT015	chr2	39281832	A	G	SOS1	U	1		Adrenocortical Carcinoma	SNV	missense		Y215H
Zhang_2015	1120	SJOS001105	chr2	39285879	T	C	SOS1	U	1		Osteosarcoma	SNV	missense		I94V
Zhang_2015	1120	SJERG011	chr2	39285915	T	C	SOS1	U	1		ALL with alterations of ERG	SNV	missense		I82V
Zhang_2015	1120	SJERG020052	chr2	39294813	T	A	SOS1	PB	1		ALL with alterations of ERG	SNV	missense		N57Y
Zhang_2015	1120	SJBALL021324	chr2	39294873	T	C	SOS1	PB	1		ALL with alterations of ERG	SNV	missense		T37A
Zhang_2015	1120	SJHYPER126	chr2	39294873	T	C	SOS1	PB	1		Hyperdiploid ALL	SNV	missense		T37A
Zhang_2015	1120	SJHGG033	chr19	1206953	A	G	STK11	PB	1		High Grade Glioma	SNV	missense		E14G
Zhang_2015	1120	SJAMLM7013	chr19	1206983	C	T	STK11	PB	1		Acute megakaryoblastic leukemia	SNV	missense		T24M
Zhang_2015	1120	SJLGG032	chr19	1221979	C	A	STK11	PB	1		Low Grade Glioma	SNV	missense		F298L
Zhang_2015	1120	SJMB011	chr19	1223090	G	A	STK11	U	1		Medulloblastoma	SNV	missense		D343N
Zhang_2015	1120	SJHGG069	chr10	104264080	C	G	SUFU	U	1		High Grade Glioma	SNV	missense		I57M
Zhang_2015	1120	SJHGG016	chr10	104357002	-	GACGAGGAC	SUFU	U	1		High Grade Glioma	SNV	proteinIns		DEDinsS288
Zhang_2015	1120	SJACT067	chr10	104357020	G	A	SUFU	U	1		Adrenocortical Carcinoma	SNV	missense		G294S
Zhang_2015	1120	SJBALL021514	chr10	104375047	A	G	SUFU	PB	1		ALL with alterations of ERG	SNV	missense		S349G
Zhang_2015	1120	SJEPD001526	chr10	104375086	C	T	SUFU	PB	1		Ependymoma	SNV	missense		R362C
Zhang_2015	1120	SJMLL004	chr10	104375086	C	T	SUFU	PB	1		Mixed Lineage Leukemia	SNV	missense		R362C
Zhang_2015	1120	SJNBL027	chr10	104377079	A	G	SUFU	U	1		Neuroblastoma	SNV	missense		Y397C
Zhang_2015	1120	SJEPD001502	chr10	104377169	A	G	SUFU	PB	1		Ependymoma	SNV	missense		H427R
Zhang_2015	1120	SJHGG093	chr10	104389902	C	T	SUFU	U	1		High Grade Glioma	SNV	missense		P482L
Zhang_2015	1120	SJOS018	chr17	7573948	C	G	TP53	U	1		Osteosarcoma	SNV	missense		G360A
Zhang_2015	1120	SJNBL197	chr17	7576544	G	A	TP53	U	1		Neuroblastoma	SNV	missense		S345L
Zhang_2015	1120	SJERG016	chr17	7576931	G	A	TP53	B	1		ALL with alterations of ERG	SNV	splice_region		R306_E9splice
Zhang_2015	1120	SJE2A024	chr17	7579538	A	G	TP53	U	1		B-Lineage ALL E2A-PBX1 Subtype	SNV	missense		I50T
Zhang_2015	1120	SJHYPO002	chr9	135771678	T	C	TSC1	PB	1		Hypodiploid ALL	SNV	missense		S1147G
Zhang_2015	1120	SJRHB031	chr9	135771731	G	A	TSC1	PB	1		Rhabdosarcoma	SNV	missense		A1129V
Zhang_2015	1120	SJEWS010367	chr9	135781005	G	C	TSC1	U	1		Ewing's sarcoma	SNV	missense		Q654E
Zhang_2015	1120	SJACT065	chr9	135781005	G	C	TSC1	U	1		Adrenocortical Carcinoma	SNV	missense		Q654E
Zhang_2015	1120	SJPHALL020034	chr9	135781265	G	A	TSC1	U	1		BCR-ABL1 ALL	SNV	missense		A567V
Zhang_2015	1120	SJEWS010365	chr9	135781334	C	T	TSC1	U	1		Ewing's sarcoma	SNV	missense		G544E
Zhang_2015	1120	SJE2A062	chr9	135781376	C	G	TSC1	PB	1		B-Lineage ALL E2A-PBX1 Subtype	SNV	missense		S530T
Zhang_2015	1120	SJNBL010	chr9	135782693	C	A	TSC1	PB	1		Neuroblastoma	SNV	missense		G443V
Zhang_2015	1120	SJE2A066	chr9	135786868	G	A	TSC1	U	1		B-Lineage ALL E2A-PBX1 Subtype	SNV	missense		S334L
Zhang_2015	1120	SJERG020300	chr9	135801012	G	C	TSC1	U	1		ALL with alterations of ERG	SNV	missense		Q109E
Zhang_2015	1120	SJCBF122	chr9	135804196	G	A	TSC1	U	1		Core binding factor AML	SNV	missense		R22W
Zhang_2015	1120	SJEPD007	chr16	2104334	A	G	TSC2	U	1		Ependymoma	SNV	missense		K125R
Zhang_2015	1120	SJHGG051	chr16	2104355	C	G	TSC2	U	1		High Grade Glioma	SNV	missense		S132C
Zhang_2015	1120	SJHGG051	chr16	2104389	C	G	TSC2	U	1		High Grade Glioma	SNV	missense		F143L
Zhang_2015	1120	SJHGG101	chr16	2105442	C	T	TSC2	U	1		High Grade Glioma	SNV	missense		S174L
Zhang_2015	1120	SJMB025	chr16	2106729	C	T	TSC2	U	1		Medulloblastoma	SNV	missense		R245C
Zhang_2015	1120	SJPHALL020041	chr16	2110684	C	T	TSC2	PB	1		BCR-ABL1 ALL	SNV	missense		P330L
Zhang_2015	1120	SJACT066	chr16	2110765	C	T	TSC2	PB	1		Adrenocortical Carcinoma	SNV	missense		A357V
Zhang_2015	1120	SJMB036	chr16	2112543	C	T	TSC2	PB	1		Medulloblastoma	SNV	missense		H435Y
Zhang_2015	1120	SJETV022	chr16	2121610	G	A	TSC2	U	1		ETV6-RUNX1 ALL	SNV	missense		D647N
Zhang_2015	1120	SJOS012	chr16	2121883	G	A	TSC2	PB	1		Osteosarcoma	SNV	missense		G682E
Zhang_2015	1120	SJEWS010369	chr16	2126499	G	A	TSC2	U	1		Ewing's sarcoma	SNV	missense		R917Q
Zhang_2015	1120	SJBALL036	chr16	2126510	C	G	TSC2	U	1		BALL	SNV	missense		L921V
Zhang_2015	1120	SJRHB009	chr16	2134230	C	T	TSC2	U	1		Rhabdosarcoma	SNV	missense		S1269L
Zhang_2015	1120	SJEPD001506	chr16	2134317	C	T	TSC2	PB	1		Ependymoma	SNV	missense		S1298L
Zhang_2015	1120	SJACT064	chr16	2134439	G	A	TSC2	PB	1		Adrenocortical Carcinoma	SNV	missense		D1339N
Zhang_2015	1120	SJEPD001518	chr16	2136783	C	T	TSC2	PB	1		Ependymoma	SNV	missense		R1567C
Zhang_2015	1120	SJINF017	chr16	2138453	G	A	TSC2	U	1		Infant ALL	SNV	missense		E1689K
Zhang_2015	1120	SJHGG019	chr16	2138483	C	T	TSC2	U	1		High Grade Glioma	SNV	missense		P1699S
Zhang_2015	1120	SJMB037	chr3	10183559	G	A	VHL	PB	1		Medulloblastoma	SNV	missense		E10K
Zhang_2015	1120	SJHGG061	chr3	10183698	C	G	VHL	PB	1		High Grade Glioma	SNV	missense		A56G
Zhang_2015	1120	SJOS014	chr3	10183772	C	T	VHL	PB	1		Osteosarcoma	SNV	missense		P81S
Zhang_2015	1120	SJNBL004	chr3	10183832	C	G	VHL	U	1		Neuroblastoma	SNV	missense		L101V
Zhang_2015	1120	SJAMLM7012	chr3	10191585	A	G	VHL	PB	1		Acute megakaryoblastic leukemia	SNV	missense		N193S
Zhang_2015	1120	SJLGG012	chr3	10191636	G	A	VHL	PB	1		Low Grade Glioma	SNV	missense		R210Q
Zhang_2015	1120	SJHGG079	chr11	32450117	G	A	WT1	PB	1		High Grade Glioma	SNV	missense		P232L
Zhang_2015	1120	SJOS001108	chr11	32450142	C	T	WT1	U	1		Osteosarcoma	SNV	missense		G224R
Zhang_2015	1120	SJBALL021514	chr11	32450146	G	C	WT1	PB	1		ALL with alterations of ERG	SNV	missense		F222L
Zhang_2015	1120	SJETV070	chr19	45855805	T	-	ERCC2	PP	1		ETV6-RUNX1 ALL	SNV	frameshift		R669fs
Zhang_2015	1120	SJACT007	chr2	128044507	-	ACTGCT	ERCC3	PP	1		Adrenocortical Carcinoma	SNV	proteinIns		SSinsE372
Zhang_2015	1120	SJE2A036	chr3	10133889	T	G	FANCD2	PP	1		B-Lineage ALL E2A-PBX1 Subtype	SNV	missense		W1268G
Zhang_2015	1120	SJPHALL020038	chr15	89858550	G	A	FANCI	PP	1		BCR-ABL1 ALL	SNV	missense		R1285Q
Zhang_2015	1120	SJE2A056	chr14	45658326	C	T	FANCM	PP	1		B-Lineage ALL E2A-PBX1 Subtype	SNV	nonsense		Q1701*
Zhang_2015	1120	SJE2A028	chr1	45797760	T	C	MUTYH	PP	1		B-Lineage ALL E2A-PBX1 Subtype	SNV	splice		V309_E11splice
Zhang_2015	1120	SJMB016	chr1	45797760	T	C	MUTYH	PP	1		Medulloblastoma	SNV	splice		V309_E11splice
Zhang_2015	1120	SJHYPO056	chr12	111884940	CAGAAGCA	-	SH2B3	PP	1		Hypodiploid ALL	SNV	frameshift		T313_A315fs
Zhang_2015	1120	SJBALL021083	chr11	108199929	T	G	ATM	P	1		iAmp21 ALL	SNV	missense		V2424G
Zhang_2015	1120	SJE2A062	chr11	108155009	G	-	ATM	P	1		B-Lineage ALL E2A-PBX1 Subtype	SNV	frameshift		V1268fs
Zhang_2015	1120	SJHGG027	chr11	108196911	-	T	ATM	P	1		High Grade Glioma	SNV	frameshift		L2312fs
Zhang_2015	1120	SJHGG027	chr11	108202604	A	C	ATM	P	1		High Grade Glioma	SNV	splice		L2544_E52splice
Zhang_2015	1120	SJPHALL020043	chr11	108119737	-	ACAG	ATM	P	1		BCR-ABL1 ALL	SNV	frameshift		S381fs
Zhang_2015	1120	SJHYPER125	chr15	91304153	-	A	BLM	P	1		Hyperdiploid ALL	SNV	frameshift		S517fs
Zhang_2015	1120	SJEWS001318	chr17	59793412	G	A	BRIP1	P	1		Ewing's sarcoma	SNV	nonsense		R798*
Zhang_2015	1120	SJE2A029	chr11	47256403	AG	-	DDB2	P	1		B-Lineage ALL E2A-PBX1 Subtype	SNV	frameshift		T266_V267fs
Zhang_2015	1120	SJEPD029	chr2	128046258	C	-	ERCC3	P	1		Ependymoma	SNV	frameshift		S335fs
Zhang_2015	1120	SJEPD036	chr2	128050332	G	A	ERCC3	P	1		Ependymoma	SNV	nonsense		R109*
Zhang_2015	1120	SJHYPER097	chr2	128044348	G	A	ERCC3	P	1		Hyperdiploid ALL	SNV	nonsense		R425*
Zhang_2015	1120	SJNBL002	chr2	128050332	G	A	ERCC3	P	1		Neuroblastoma	SNV	nonsense		R109*
Zhang_2015	1120	SJERG009	chr13	103518037	A	-	ERCC5	P	1		ALL with alterations of ERG	SNV	frameshift		S659fs
Zhang_2015	1120	SJNBL135	chr16	89818545	C	A	FANCA	P	1		Neuroblastoma	SNV	nonsense		E1023*
Zhang_2015	1120	SJEWS001302	chr9	97912338	G	A	FANCC	P	1		Ewing's sarcoma	SNV	nonsense		R185*
Zhang_2015	1120	SJETV036	chr15	89824480	T	A	FANCI	P	1		ETV6-RUNX1 ALL	SNV	nonsense		Y487*
Zhang_2015	1120	SJINF034	chr15	89820093	G	A	FANCI	P	1		Infant ALL	SNV	missense		G422R
Zhang_2015	1120	SJNBL156	chr2	58387285	CT	-	FANCL	P	1		Neuroblastoma	SNV	frameshift		Q350fs
Zhang_2015	1120	SJOS001126	chr2	58449154	TT	-	FANCL	P	1		Osteosarcoma	SNV	frameshift		Q99fs
Zhang_2015	1120	SJOS001	chr14	45606305	G	A	FANCM	P	1		Osteosarcoma	SNV	nonsense		W181*
Zhang_2015	1120	SJEWS010375	chr1	45797374	G	-	MUTYH	P	1		Ewing's sarcoma	SNV	frameshift		A379fs
Zhang_2015	1120	SJEPD023	chr8	90967651	ATTT	-	NBN	P	1		Ependymoma	SNV	frameshift		S418_N419fs
Zhang_2015	1120	SJBALL074	chr15	34635271	A	-	NOP10	P	1		BALL	SNV	frameshift		F2fs
Zhang_2015	1120	SJEPD001509	chr15	34634229	TCGGTGTCGA	-	NOP10	P	1		Ependymoma	SNV	frameshift		S42_R45fs
Zhang_2015	1120	SJCBF029	chr8	145740367	A	-	RECQL4	P	1		Core binding factor AML	SNV	frameshift		C525fs
Zhang_2015	1120	SJTALL065	chr8	145738976	-	GACCCAGG	RECQL4	P	1		T-cell ALL	SNV	frameshift		A727fs
Zhang_2015	1120	SJEPD011	chr5	1278865	G	A	TERT	P	1		Ependymoma	SNV	missense		T726M
Zhang_2015	1120	SJBALL208	chr8	30924569	G	-	WRN	P	1		BALL	SNV	frameshift		W175fs
Zhang_2015	1120	SJETV026	chr8	30938658	A	-	WRN	P	1		ETV6-RUNX1 ALL	SNV	frameshift		D372fs
Zhang_2015	1120	SJHYPER001	chr8	30938648	C	T	WRN	P	1		Hyperdiploid ALL	SNV	nonsense		R369*
Zhang_2015	1120	SJHYPER006	chr8	30924598	T	A	WRN	P	1		Hyperdiploid ALL	SNV	nonsense		L185*
Zhang_2015	1120	SJHYPO120	chr11	108114749	G	A	ATM	B	1		Hypodiploid ALL	SNV	missense		R189K
Zhang_2015	1120	SJNBL138	chr14	45658156	G	A	FANCM	B	1		Neuroblastoma	SNV	missense		R1644Q
Zhang_2015	1120	SJHYPO041	chr1	45797707	C	T	MUTYH	B	1		Hypodiploid ALL	SNV	missense		V326M
Zhang_2015	1120	SJMB009	chr11	108164152	G	A	ATM	PB	1		Medulloblastoma	SNV	missense		R1575H
Zhang_2015	1120	SJACT001	chr11	108183194	A	C	ATM	U	1		Adrenocortical Carcinoma	SNV	missense		K1992T
Zhang_2015	1120	SJAMLM7010480	chr11	108202751	C	T	ATM	U	1		Acute megakaryoblastic leukemia	SNV	missense		S2592F
Zhang_2015	1120	SJBALL020118	chr11	108183194	A	C	ATM	U	1		BALL	SNV	missense		K1992T
Zhang_2015	1120	SJCBF123	chr11	108128315	C	G	ATM	U	1		Core binding factor AML	SNV	missense		C786W
Zhang_2015	1120	SJCBF124	chr11	108121730	A	C	ATM	U	1		Core binding factor AML	SNV	missense		Q513P
Zhang_2015	1120	SJCBF151	chr11	108153488	A	G	ATM	U	1		Core binding factor AML	SNV	missense		M1210V
Zhang_2015	1120	SJEPD039	chr11	108100002	C	A	ATM	U	1		Ependymoma	SNV	missense		Q95K
Zhang_2015	1120	SJEWS001305	chr11	108121632	A	C	ATM	U	1		Ewing's sarcoma	SNV	missense		L480F
Zhang_2015	1120	SJEWS010422	chr11	108206576	G	A	ATM	U	1		Ewing's sarcoma	SNV	missense		R2719H
Zhang_2015	1120	SJHGG105	chr11	108160416	T	C	ATM	U	1		High Grade Glioma	SNV	missense		Y1442H
Zhang_2015	1120	SJHYPER017	chr11	108216611	C	T	ATM	U	1		Hyperdiploid ALL	SNV	missense		R2854C
Zhang_2015	1120	SJHYPER092	chr11	108117798	C	T	ATM	U	1		Hyperdiploid ALL	SNV	missense		R337C
Zhang_2015	1120	SJHYPO123	chr11	108150304	A	T	ATM	U	1		Hypodiploid ALL	SNV	missense		Y1124F
Zhang_2015	1120	SJINF061	chr11	108201008	C	G	ATM	U	1		Infant ALL	SNV	missense		R2459G
Zhang_2015	1120	SJLGG021	chr11	108236087	G	A	ATM	U	1		Low Grade Glioma	SNV	missense		R3008H
Zhang_2015	1120	SJLGG038	chr11	108180945	G	C	ATM	U	1		Low Grade Glioma	SNV	missense		V1941L
Zhang_2015	1120	SJMB026	chr11	108186743	G	A	ATM	U	1		Medulloblastoma	SNV	missense		R2034Q
Zhang_2015	1120	SJMLL018	chr11	108115522	A	G	ATM	U	1		Mixed Lineage Leukemia	SNV	missense		K224E
Zhang_2015	1120	SJNBL195	chr11	108099999	A	G	ATM	U	1		Neuroblastoma	SNV	missense		M94V
Zhang_2015	1120	SJRB016	chr11	108186596	T	G	ATM	U	1		Retinoblastoma	SNV	missense		L2018W
Zhang_2015	1120	SJRB051	chr11	108117799	G	A	ATM	U	1		Retinoblastoma	SNV	missense		R337H
Zhang_2015	1120	SJRHB003	chr11	108159742	C	T	ATM	U	1		Rhabdosarcoma	SNV	missense		S1383L
Zhang_2015	1120	SJRHB040	chr11	108114793	G	A	ATM	U	1		Rhabdosarcoma	SNV	missense		G204R
Zhang_2015	1120	SJTALL002	chr11	108236072	A	G	ATM	U	1		T-cell ALL	SNV	missense		N3003S
Zhang_2015	1120	SJTALL216	chr11	108160467	G	A	ATM	U	1		T-cell ALL	SNV	missense		G1459R
Zhang_2015	1120	SJBALL020609	chr15	91337541	G	C	BLM	U	1		ALL with alterations of ERG	SNV	missense		C1055S
Zhang_2015	1120	SJETV095	chr15	91292689	A	T	BLM	U	1		ETV6-RUNX1 ALL	SNV	missense		D64V
Zhang_2015	1120	SJMEL001004	chr15	91290665	C	T	BLM	U	1		Melanoma	SNV	missense		R15C
Zhang_2015	1120	SJMEL001005	chr15	91354498	A	C	BLM	U	1		Melanoma	SNV	missense		E1313A
Zhang_2015	1120	SJNBL139	chr15	91292689	A	T	BLM	U	1		Neuroblastoma	SNV	missense		D64V
Zhang_2015	1120	SJNBL161	chr15	91298049	A	G	BLM	U	1		Neuroblastoma	SNV	missense		K323R
Zhang_2015	1120	SJACT064	chr17	59858274	G	A	BRIP1	U	1		Adrenocortical Carcinoma	SNV	missense		P574L
Zhang_2015	1120	SJBALL020625	chr17	59938807	C	G	BRIP1	U	1		PH-LIKE	SNV	splice		S31_E2splice
Zhang_2015	1120	SJBALL021896	chr17	59926584	A	G	BRIP1	U	1		BALL	SNV	missense		L138S
Zhang_2015	1120	SJE2A069	chr17	59853887	G	A	BRIP1	U	1		B-Lineage ALL E2A-PBX1 Subtype	SNV	missense		R658W
Zhang_2015	1120	SJERG020303	chr17	59937223	G	C	BRIP1	U	1		ALL with alterations of ERG	SNV	missense		P47A
Zhang_2015	1120	SJHGG090	chr17	59937223	G	C	BRIP1	U	1		High Grade Glioma	SNV	missense		P47A
Zhang_2015	1120	SJNBL137	chr17	59820429	T	C	BRIP1	U	1		Neuroblastoma	SNV	missense		N775S
Zhang_2015	1120	SJPHALL004	chr17	59793364	G	A	BRIP1	U	1		BCR-ABL1 ALL	SNV	missense		R814C
Zhang_2015	1120	SJPHALL020033	chr17	59937223	G	C	BRIP1	U	1		BCR-ABL1 ALL	SNV	missense		P47A
Zhang_2015	1120	SJPHALL026	chr17	59876593	C	T	BRIP1	U	1		BCR-ABL1 ALL	SNV	missense		R403Q
Zhang_2015	1120	SJTALL006	chr17	59853878	A	G	BRIP1	U	1		T-cell ALL	SNV	missense		C661R
Zhang_2015	1120	SJBALL079	chr11	47254419	C	G	DDB2	U	1		BALL	SNV	missense		Q171E
Zhang_2015	1120	SJE2A068	chr11	47254419	C	G	DDB2	U	1		B-Lineage ALL E2A-PBX1 Subtype	SNV	missense		Q171E
Zhang_2015	1120	SJHYPER005	chr11	47256195	T	C	DDB2	U	1		Hyperdiploid ALL	SNV	missense		V225A
Zhang_2015	1120	SJHYPER023	chr11	47259704	C	T	DDB2	U	1		Hyperdiploid ALL	SNV	missense		P402S
Zhang_2015	1120	SJTALL004	chr11	47256423	G	A	DDB2	U	1		T-cell ALL	SNV	missense		R273H
Zhang_2015	1120	SJBALL014	chr19	45868168	G	C	ERCC2	U	1		BALL	SNV	missense		I174M
Zhang_2015	1120	SJCBF107	chr19	45860760	C	T	ERCC2	U	1		Core binding factor AML	SNV	missense		R450H
Zhang_2015	1120	SJEWS010423	chr19	45860626	G	C	ERCC2	U	1		Ewing's sarcoma	SNV	missense		L461V
Zhang_2015	1120	SJHGG012	chr19	45856059	C	G	ERCC2	U	1		High Grade Glioma	SNV	missense		R616P
Zhang_2015	1120	SJHGG042	chr19	45858047	C	T	ERCC2	U	1		High Grade Glioma	SNV	missense		V536M
Zhang_2015	1120	SJHYPER014	chr19	45856371	G	A	ERCC2	U	1		Hyperdiploid ALL	SNV	missense		R601W
Zhang_2015	1120	SJHYPO054	chr19	45860760	C	T	ERCC2	U	1		Hypodiploid ALL	SNV	missense		R450H
Zhang_2015	1120	SJINF013	chr19	45867532	C	T	ERCC2	U	1		Infant ALL	SNV	missense		C259Y
Zhang_2015	1120	SJLGG006	chr19	45855556	G	C	ERCC2	U	1		Low Grade Glioma	SNV	missense		L701V
Zhang_2015	1120	SJLGG029	chr19	45867139	T	C	ERCC2	U	1		Low Grade Glioma	SNV	missense		E327G
Zhang_2015	1120	SJOS001126	chr19	45855574	G	A	ERCC2	U	1		Osteosarcoma	SNV	missense		R695C
Zhang_2015	1120	SJRHB009	chr19	45867550	C	T	ERCC2	U	1		Rhabdosarcoma	SNV	missense		R253H
Zhang_2015	1120	SJAMLM7004	chr2	128038139	C	T	ERCC3	U	1		Acute megakaryoblastic leukemia	SNV	missense		V471I
Zhang_2015	1120	SJETV043	chr2	128015297	G	A	ERCC3	U	1		ETV6-RUNX1 ALL	SNV	missense		R742W
Zhang_2015	1120	SJEWS010418	chr2	128044386	A	G	ERCC3	U	1		Ewing's sarcoma	SNV	missense		M412T
Zhang_2015	1120	SJNBL025	chr2	128036921	G	A	ERCC3	U	1		Neuroblastoma	SNV	missense		R520W
Zhang_2015	1120	SJBALL263	chr16	14029465	G	A	ERCC4	U	1		PH-LIKE	SNV	missense		G559D
Zhang_2015	1120	SJERG023	chr16	14028147	C	T	ERCC4	U	1		ALL with alterations of ERG	SNV	missense		L401F
Zhang_2015	1120	SJETV070	chr16	14016026	G	A	ERCC4	U	1		ETV6-RUNX1 ALL	SNV	missense		V116I
Zhang_2015	1120	SJHGG007	chr16	14015962	C	G	ERCC4	U	1		High Grade Glioma	SNV	missense		S94R
Zhang_2015	1120	SJHGG065	chr16	14015891	T	C	ERCC4	U	1		High Grade Glioma	SNV	missense		Y71H
Zhang_2015	1120	SJHYPER007	chr16	14041672	G	A	ERCC4	U	1		Hyperdiploid ALL	SNV	missense		R740H
Zhang_2015	1120	SJHYPO039	chr16	14022076	G	A	ERCC4	U	1		Hypodiploid ALL	SNV	missense		G259E
Zhang_2015	1120	SJINF021	chr16	14029422	G	A	ERCC4	U	1		Infant ALL	SNV	missense		G545R
Zhang_2015	1120	SJOS001117	chr16	14014085	G	C	ERCC4	U	1		Osteosarcoma	SNV	missense		Q21H
Zhang_2015	1120	SJOS012	chr16	14029482	G	A	ERCC4	U	1		Osteosarcoma	SNV	missense		A565T
Zhang_2015	1120	SJE2A013	chr13	103525619	C	T	ERCC5	U	1		B-Lineage ALL E2A-PBX1 Subtype	SNV	missense		R964W
Zhang_2015	1120	SJE2A028	chr13	103514062	A	T	ERCC5	U	1		B-Lineage ALL E2A-PBX1 Subtype	SNV	missense		K293I
Zhang_2015	1120	SJEPD001	chr13	103524732	C	A	ERCC5	U	1		Ependymoma	SNV	missense		L955I
Zhang_2015	1120	SJEPD020	chr13	103513923	A	G	ERCC5	U	1		Ependymoma	SNV	missense		I247V
Zhang_2015	1120	SJETV043	chr13	103510755	A	G	ERCC5	U	1		ETV6-RUNX1 ALL	SNV	missense		E220G
Zhang_2015	1120	SJHGG062	chr13	103518708	G	A	ERCC5	U	1		High Grade Glioma	SNV	missense		G766R
Zhang_2015	1120	SJNBL017	chr13	103518032	T	C	ERCC5	U	1		Neuroblastoma	SNV	missense		V657A
Zhang_2015	1120	SJNBL157	chr13	103524581	G	C	ERCC5	U	1		Neuroblastoma	SNV	missense		K904N
Zhang_2015	1120	SJNBL197	chr13	103498654	C	T	ERCC5	U	1		Neuroblastoma	SNV	missense		S13F
Zhang_2015	1120	SJNBL197	chr13	103525640	A	G	ERCC5	U	1		Neuroblastoma	SNV	missense		T971A
Zhang_2015	1120	SJBALL021372	chr16	89816220	G	A	FANCA	U	1		ALL with alterations of ERG	SNV	missense		R1053C
Zhang_2015	1120	SJBALL095	chr16	89805351	C	T	FANCA	U	1		BALL	SNV	missense		R1400H
Zhang_2015	1120	SJBALL215	chr16	89877157	C	T	FANCA	U	1		ALL with alterations of ERG	SNV	missense		M160I
Zhang_2015	1120	SJE2A007	chr16	89862412	C	T	FANCA	U	1		B-Lineage ALL E2A-PBX1 Subtype	SNV	missense		S303N
Zhang_2015	1120	SJE2A028	chr16	89825007	C	T	FANCA	U	1		B-Lineage ALL E2A-PBX1 Subtype	SNV	missense		A987T
Zhang_2015	1120	SJEPD001546	chr16	89877157	C	T	FANCA	U	1		Ependymoma	SNV	missense		M160I
Zhang_2015	1120	SJEPD026	chr16	89857830	G	A	FANCA	U	1		Ependymoma	SNV	missense		S447L
Zhang_2015	1120	SJERG020306	chr16	89877429	G	C	FANCA	U	1		ALL with alterations of ERG	SNV	missense		L112V
Zhang_2015	1120	SJETV028	chr16	89851287	G	C	FANCA	U	1		ETV6-RUNX1 ALL	SNV	missense		P482R
Zhang_2015	1120	SJETV075	chr16	89831372	C	G	FANCA	U	1		ETV6-RUNX1 ALL	SNV	missense		D902H
Zhang_2015	1120	SJHGG029	chr16	89805603	C	T	FANCA	U	1		High Grade Glioma	SNV	missense		V1369M
Zhang_2015	1120	SJHYPER104	chr16	89813083	G	T	FANCA	U	1		Hyperdiploid ALL	SNV	missense		A1141D
Zhang_2015	1120	SJHYPO029	chr16	89845230	G	C	FANCA	U	1		Hypodiploid ALL	SNV	missense		A602G
Zhang_2015	1120	SJLGG020	chr16	89839789	G	A	FANCA	U	1		Low Grade Glioma	SNV	missense		A635V
Zhang_2015	1120	SJMB032	chr16	89818566	C	T	FANCA	U	1		Medulloblastoma	SNV	missense		D1016N
Zhang_2015	1120	SJMLL013	chr16	89857914	A	G	FANCA	U	1		Mixed Lineage Leukemia	SNV	missense		F419S
Zhang_2015	1120	SJRHB040	chr16	89857889	C	G	FANCA	U	1		Rhabdosarcoma	SNV	missense		M427I
Zhang_2015	1120	SJRHB042	chr16	89839789	G	A	FANCA	U	1		Rhabdosarcoma	SNV	missense		A635V
Zhang_2015	1120	SJTALL066	chr16	89836662	C	T	FANCA	U	1		T-cell ALL	SNV	missense		G743D
Zhang_2015	1120	SJBALL201	chr9	97864077	A	G	FANCC	U	1		BALL	SNV	missense		L530S
Zhang_2015	1120	SJEPD001530	chr9	97912326	G	C	FANCC	U	1		Ependymoma	SNV	missense		P189A
Zhang_2015	1120	SJMB004	chr9	97863994	C	A	FANCC	U	1		Medulloblastoma	SNV	missense		V558F
Zhang_2015	1120	SJNBL011	chr9	98009773	A	C	FANCC	U	1		Neuroblastoma	SNV	missense		F64C
Zhang_2015	1120	SJNBL170	chr9	97934335	G	A	FANCC	U	1		Neuroblastoma	SNV	missense		P147L
Zhang_2015	1120	SJACT070	chr3	10084319	A	C	FANCD2	U	1		Adrenocortical Carcinoma	SNV	missense		H287P
Zhang_2015	1120	SJCBF030	chr3	10081429	C	G	FANCD2	U	1		Core binding factor AML	SNV	missense		L199V
Zhang_2015	1120	SJEPD010	chr3	10119777	G	A	FANCD2	U	1		Ependymoma	SNV	missense		V958M
Zhang_2015	1120	SJETV041	chr3	10127596	G	A	FANCD2	U	1		ETV6-RUNX1 ALL	SNV	missense		E1109K
Zhang_2015	1120	SJHGG080	chr3	10106493	C	T	FANCD2	U	1		High Grade Glioma	SNV	missense		P701L
Zhang_2015	1120	SJHYPER048	chr3	10115047	G	A	FANCD2	U	1		Hyperdiploid ALL	SNV	missense		E906K
Zhang_2015	1120	SJHYPER227	chr3	10107143	A	G	FANCD2	U	1		Hyperdiploid ALL	SNV	missense		H745R
Zhang_2015	1120	SJINF008	chr3	10074573	T	C	FANCD2	U	1		Infant ALL	SNV	missense		V41A
Zhang_2015	1120	SJLGG034	chr3	10107088	C	T	FANCD2	U	1		Low Grade Glioma	SNV	missense		P727S
Zhang_2015	1120	SJNBL015	chr3	10130529	C	T	FANCD2	U	1		Neuroblastoma	SNV	missense		T1193I
Zhang_2015	1120	SJNBL144	chr3	10101996	A	G	FANCD2	U	1		Neuroblastoma	SNV	missense		I559V
Zhang_2015	1120	SJOS001109	chr3	10119777	G	A	FANCD2	U	1		Osteosarcoma	SNV	missense		V958M
Zhang_2015	1120	SJTALL014	chr3	10085532	C	T	FANCD2	U	1		T-cell ALL	SNV	missense		S373L
Zhang_2015	1120	SJBALL162	chr6	35430666	C	T	FANCE	U	1		BALL	SNV	missense		T495I
Zhang_2015	1120	SJE2A013	chr6	35420551	C	A	FANCE	U	1		B-Lineage ALL E2A-PBX1 Subtype	SNV	missense		P77T
Zhang_2015	1120	SJEPD030	chr6	35420551	C	A	FANCE	U	1		Ependymoma	SNV	missense		P77T
Zhang_2015	1120	SJMB018	chr6	35426155	C	T	FANCE	U	1		Medulloblastoma	SNV	missense		L351F
Zhang_2015	1120	SJRB020	chr6	35423663	G	C	FANCE	U	1		Retinoblastoma	SNV	missense		D130H
Zhang_2015	1120	SJBALL021895	chr11	22646270	G	A	FANCF	U	1		BALL	SNV	nonsense		Q363*
Zhang_2015	1120	SJTALL070	chr11	22647038	C	G	FANCF	U	1		T-cell ALL	SNV	missense		A107P
Zhang_2015	1120	SJBALL020984	chr9	35075693	G	A	FANCG	U	1		iAmp21 ALL	SNV	missense		A401V
Zhang_2015	1120	SJEPD001502	chr9	35075305	A	T	FANCG	U	1		Ependymoma	SNV	missense		F484Y
Zhang_2015	1120	SJEPD017	chr9	35074171	ACGGATCCAG	-	FANCG	U	1		Ependymoma	SNV	frameshift		S598_R601fs
Zhang_2015	1120	SJEWS001316	chr9	35078282	C	G	FANCG	U	1		Ewing's sarcoma	SNV	missense		W122C
Zhang_2015	1120	SJEWS010417	chr9	35078617	G	A	FANCG	U	1		Ewing's sarcoma	SNV	missense		R98W
Zhang_2015	1120	SJAMLM7010480	chr15	89849345	C	G	FANCI	U	1		Acute megakaryoblastic leukemia	SNV	missense		L1153V
Zhang_2015	1120	SJETV085	chr15	89849354	G	C	FANCI	U	1		ETV6-RUNX1 ALL	SNV	missense		G1156R
Zhang_2015	1120	SJEWS001311	chr15	89857843	G	A	FANCI	U	1		Ewing's sarcoma	SNV	splice		A1241_E36splice
Zhang_2015	1120	SJHGG058	chr15	89843615	A	T	FANCI	U	1		High Grade Glioma	SNV	missense		Q963L
Zhang_2015	1120	SJHGG067	chr15	89837075	T	A	FANCI	U	1		High Grade Glioma	SNV	missense		F768Y
Zhang_2015	1120	SJHYPER102	chr15	89837141	G	A	FANCI	U	1		Hyperdiploid ALL	SNV	missense		G790D
Zhang_2015	1120	SJHYPO020	chr15	89804000	TGT	-	FANCI	U	1		Hypodiploid ALL	SNV	proteinDel		C72del
Zhang_2015	1120	SJNBL006	chr15	89804933	G	A	FANCI	U	1		Neuroblastoma	SNV	missense		A136T
Zhang_2015	1120	SJBALL264	chr2	58392880	T	C	FANCL	U	1		BALL	SNV	missense		T224A
Zhang_2015	1120	SJCBF150	chr2	58392880	T	C	FANCL	U	1		Core binding factor AML	SNV	missense		T224A
Zhang_2015	1120	SJEPD001502	chr2	58449163	C	A	FANCL	U	1		Ependymoma	SNV	missense		K96N
Zhang_2015	1120	SJETV069	chr2	58459202	G	C	FANCL	U	1		ETV6-RUNX1 ALL	SNV	missense		L48V
Zhang_2015	1120	SJEWS010365	chr2	58392928	C	T	FANCL	U	1		Ewing's sarcoma	SNV	missense		D208N
Zhang_2015	1120	SJPHALL015	chr2	58453898	G	C	FANCL	U	1		BCR-ABL1 ALL	SNV	missense		L80V
Zhang_2015	1120	SJAMLM7010	chr14	45658245	A	G	FANCM	U	1		Acute megakaryoblastic leukemia	SNV	missense		S1674G
Zhang_2015	1120	SJBALL263	chr14	45639842	T	G	FANCM	U	1		PH-LIKE	SNV	missense		F685V
Zhang_2015	1120	SJE2A059	chr14	45654531	C	T	FANCM	U	1		B-Lineage ALL E2A-PBX1 Subtype	SNV	missense		L1543F
Zhang_2015	1120	SJE2A061	chr14	45654510	A	G	FANCM	U	1		B-Lineage ALL E2A-PBX1 Subtype	SNV	missense		N1536D
Zhang_2015	1120	SJEPD020	chr14	45650888	C	T	FANCM	U	1		Ependymoma	SNV	missense		R1456C
Zhang_2015	1120	SJHYPO006	chr14	45623938	G	C	FANCM	U	1		Hypodiploid ALL	SNV	missense		D408H
Zhang_2015	1120	SJHYPO123	chr14	45645661	G	T	FANCM	U	1		Hypodiploid ALL	SNV	missense		G1235V
Zhang_2015	1120	SJLGG024	chr14	45605397	G	A	FANCM	U	1		Low Grade Glioma	SNV	missense		D55N
Zhang_2015	1120	SJNBL035	chr14	45633577	C	T	FANCM	U	1		Neuroblastoma	SNV	missense		R533C
Zhang_2015	1120	SJOS001114	chr14	45642312	T	C	FANCM	U	1		Osteosarcoma	SNV	missense		W739R
Zhang_2015	1120	SJOS002	chr14	45644847	G	A	FANCM	U	1		Osteosarcoma	SNV	missense		E964K
Zhang_2015	1120	SJRB002	chr14	45633578	G	A	FANCM	U	1		Retinoblastoma	SNV	missense		R533H
Zhang_2015	1120	SJAMLM7010	chr1	45797428	C	T	MUTYH	U	1		Acute megakaryoblastic leukemia	SNV	missense		R361H
Zhang_2015	1120	SJE2A060	chr1	45798151	C	T	MUTYH	U	1		B-Lineage ALL E2A-PBX1 Subtype	SNV	missense		V231M
Zhang_2015	1120	SJEWS001320	chr1	45797482	G	C	MUTYH	U	1		Ewing's sarcoma	SNV	missense		S343W
Zhang_2015	1120	SJEWS010369	chr1	45796894	TCC	-	MUTYH	U	1		Ewing's sarcoma	SNV	proteinDel		Q475_E476>Q
Zhang_2015	1120	SJLGG036	chr1	45797157	G	T	MUTYH	U	1		Low Grade Glioma	SNV	missense		L417M
Zhang_2015	1120	SJOS017	chr1	45797159	G	T	MUTYH	U	1		Osteosarcoma	SNV	missense		A416D
Zhang_2015	1120	SJERG028	chr8	90993696	G	T	NBN	U	1		ALL with alterations of ERG	SNV	missense		T76N
Zhang_2015	1120	SJHGG017	chr8	90993092	G	A	NBN	U	1		High Grade Glioma	SNV	missense		S117F
Zhang_2015	1120	SJLGG029	chr8	90993657	C	G	NBN	U	1		Low Grade Glioma	SNV	missense		R89P
Zhang_2015	1120	SJLGG032	chr8	90965912	C	A	NBN	U	1		Low Grade Glioma	SNV	missense		D469Y
Zhang_2015	1120	SJMLL021	chr8	90983439	A	G	NBN	U	1		Mixed Lineage Leukemia	SNV	missense		F222L
Zhang_2015	1120	SJPHALL001	chr8	90993091	AGA	-	NBN	U	1		BCR-ABL1 ALL	SNV	proteinDel		S117del
Zhang_2015	1120	SJCBF111	chr5	177577935	A	G	NHP2	U	1		Core binding factor AML	SNV	missense		M97T
Zhang_2015	1120	SJEPD027	chr5	177577935	A	G	NHP2	U	1		Ependymoma	SNV	missense		M97T
Zhang_2015	1120	SJCBF032	chr17	56787298	T	G	RAD51C	U	1		Core binding factor AML	SNV	missense		L262V
Zhang_2015	1120	SJNBL186	chr17	56811554	C	T	RAD51C	U	1		Neuroblastoma	SNV	missense		R368W
Zhang_2015	1120	SJMB010	chr8	145742577	G	T	RECQL4	U	1		Medulloblastoma	SNV	splice		E4_splice
Zhang_2015	1120	SJRB001130	chr8	145737292	A	C	RECQL4	U	1		Retinoblastoma	SNV	splice		R1131_E19splice
Zhang_2015	1120	SJCBF030	chr12	111885799	C	T	SH2B3	U	1		Core binding factor AML	SNV	missense		T474M
Zhang_2015	1120	SJE2A006	chr12	111885832	ATTCAGAGTCCCTTCCTCACTGGG	-	SH2B3	U	1		B-Lineage ALL E2A-PBX1 Subtype	SNV	proteinDel		D485_G493>G
Zhang_2015	1120	SJHGG104	chr12	111885900	C	T	SH2B3	U	1		High Grade Glioma	SNV	missense		R508W
Zhang_2015	1120	SJHYPER020	chr12	111856181	G	A	SH2B3	U	1		Hyperdiploid ALL	SNV	missense		E78K
Zhang_2015	1120	SJHYPO006	chr12	111886029	C	T	SH2B3	U	1		Hypodiploid ALL	SNV	missense		R551W
Zhang_2015	1120	SJHYPO029	chr12	111885286	C	T	SH2B3	U	1		Hypodiploid ALL	SNV	missense		R392W
Zhang_2015	1120	SJNBL004	chr12	111884785	G	A	SH2B3	U	1		Neuroblastoma	SNV	missense		E292K
Zhang_2015	1120	SJNBL172	chr12	111884785	G	A	SH2B3	U	1		Neuroblastoma	SNV	missense		E292K
Zhang_2015	1120	SJNBL176	chr12	111886029	C	T	SH2B3	U	1		Neuroblastoma	SNV	missense		R551W
Zhang_2015	1120	SJPHALL020046	chr12	111885832	ATTCAGAGTCCCTTCCTCACTGGG	-	SH2B3	U	1		BCR-ABL1 ALL	SNV	proteinDel		D485_G493>G
Zhang_2015	1120	SJCBF116	chr5	1253951	G	A	TERT	U	1		Core binding factor AML	SNV	splice		T1098_E16splice
Zhang_2015	1120	SJEPD005	chr5	1254521	C	T	TERT	U	1		Ependymoma	SNV	missense		R1086H
Zhang_2015	1120	SJETV092	chr5	1254510	C	T	TERT	U	1		ETV6-RUNX1 ALL	SNV	missense		V1090M
Zhang_2015	1120	SJNBL187	chr5	1294222	C	T	TERT	U	1		Neuroblastoma	SNV	missense		G260D
Zhang_2015	1120	SJACT001	chr8	30969156	C	T	WRN	U	1		Adrenocortical Carcinoma	SNV	missense		T705I
Zhang_2015	1120	SJEPD033	chr8	30982438	A	C	WRN	U	1		Ependymoma	SNV	missense		H916P
Zhang_2015	1120	SJERG010	chr8	30921945	T	C	WRN	U	1		ALL with alterations of ERG	SNV	missense		M117T
Zhang_2015	1120	SJERG020305	chr8	30933806	T	C	WRN	U	1		ALL with alterations of ERG	SNV	splice		R280_E8splice
Zhang_2015	1120	SJEWS010361	chr8	30938667	A	C	WRN	U	1		Ewing's sarcoma	SNV	missense		E375A
Zhang_2015	1120	SJHGG054	chr8	30921922	T	G	WRN	U	1		High Grade Glioma	SNV	missense		C109W
Zhang_2015	1120	SJMB026	chr8	31024597	A	G	WRN	U	1		Medulloblastoma	SNV	missense		I1348V
Zhang_2015	1120	SJOS001110	chr8	30921921	G	A	WRN	U	1		Osteosarcoma	SNV	missense		C109Y
Zhang_2015	1120	SJPHALL020042	chr8	30969156	C	T	WRN	U	1		BCR-ABL1 ALL	SNV	missense		T705I
Zhang_2015	1120	SJPHALL027	chr8	30924682	C	T	WRN	U	1		BCR-ABL1 ALL	SNV	missense		A213V
Zhang_2015	1120	SJRB031	chr8	30948435	G	C	WRN	U	1		Retinoblastoma	SNV	missense		M602I
Zhang_2015	1120	SJTALL075	chr8	30946411	T	A	WRN	U	1		T-cell ALL	SNV	missense		L528M
Zhang_2015	1120	SJBALL021514	chr9	100437771	G	A	XPA	U	1		ALL with alterations of ERG	SNV	missense		R258C
Zhang_2015	1120	SJHGG066	chr9	100447307	G	C	XPA	U	1		High Grade Glioma	SNV	missense		L191V
Zhang_2015	1120	SJBALL006	chr3	14199786	C	T	XPC	U	1		BALL	SNV	missense		E533K
Zhang_2015	1120	SJBALL021324	chr3	14188879	T	C	XPC	U	1		ALL with alterations of ERG	SNV	missense		K839E
Zhang_2015	1120	SJBALL063	chr3	14201311	C	T	XPC	U	1		PH-LIKE	SNV	missense		R307Q
Zhang_2015	1120	SJEPD001532	chr3	14190078	C	T	XPC	U	1		Ependymoma	SNV	missense		G802S
Zhang_2015	1120	SJETV041	chr3	14200119	G	A	XPC	U	1		ETV6-RUNX1 ALL	SNV	missense		R422W
Zhang_2015	1120	SJETV047	chr3	14200383	G	C	XPC	U	1		ETV6-RUNX1 ALL	SNV	missense		P334A
Zhang_2015	1120	SJETV088	chr3	14214383	C	T	XPC	U	1		ETV6-RUNX1 ALL	SNV	missense		D95N
Zhang_2015	1120	SJHGG049	chr3	14214383	C	T	XPC	U	1		High Grade Glioma	SNV	missense		D95N
Zhang_2015	1120	SJINF060	chr3	14209838	G	A	XPC	U	1		Infant ALL	SNV	missense		A152V
Zhang_2015	1120	SJNBL184	chr3	14197917	G	A	XPC	U	1		Neuroblastoma	SNV	missense		R651W
Zhang_2015	1120	SJBALL014	chr11	120351047	T	C	ARHGEF12		1		BALL	SNV	missense		F1382S
Zhang_2015	1120	SJCBF142	chr11	120322326	G	C	ARHGEF12		1		Core binding factor AML	SNV	missense		G650A
Zhang_2015	1120	SJE2A006	chr11	120322317	G	A	ARHGEF12		1		B-Lineage ALL E2A-PBX1 Subtype	SNV	missense		R647H
Zhang_2015	1120	SJE2A035	chr11	120322317	G	A	ARHGEF12		1		B-Lineage ALL E2A-PBX1 Subtype	SNV	missense		R647H
Zhang_2015	1120	SJETV078	chr11	120351137	C	T	ARHGEF12		1		ETV6-RUNX1 ALL	SNV	missense		S1412L
Zhang_2015	1120	SJETV089	chr11	120345341	A	G	ARHGEF12		1		ETV6-RUNX1 ALL	SNV	missense		I1036V
Zhang_2015	1120	SJHGG067	chr11	120343760	G	A	ARHGEF12		1		High Grade Glioma	SNV	missense		R986H
Zhang_2015	1120	SJNBL039	chr11	120352166	C	T	ARHGEF12		1		Neuroblastoma	SNV	missense		R1479C
Zhang_2015	1120	SJOS009	chr11	120351033	T	G	ARHGEF12		1		Osteosarcoma	SNV	missense		S1377R
Zhang_2015	1120	SJRB020	chr11	120312864	C	G	ARHGEF12		1		Retinoblastoma	SNV	missense		R419G
Zhang_2015	1120	SJBALL021058	chr1	27105598	G	A	ARID1A		1		iAmp21 ALL	SNV	missense		G1520S
Zhang_2015	1120	SJBALL021081	chr1	27105544	TATTTCCG	-	ARID1A		1		ALL with alterations of ERG	SNV	frameshift		Y1502_R1504fs
Zhang_2015	1120	SJE2A043	chr1	27058091	C	T	ARID1A		1		B-Lineage ALL E2A-PBX1 Subtype	SNV	missense		P600L
Zhang_2015	1120	SJE2A062	chr1	27099431	G	A	ARID1A		1		B-Lineage ALL E2A-PBX1 Subtype	SNV	missense		R1223H
Zhang_2015	1120	SJETV001	chr1	27107174	C	T	ARID1A		1		ETV6-RUNX1 ALL	SNV	missense		S2045L
Zhang_2015	1120	SJHGG035	chr1	27087464	C	T	ARID1A		1		High Grade Glioma	SNV	missense		P680S
Zhang_2015	1120	SJHGG094	chr1	27105838	G	A	ARID1A		1		High Grade Glioma	SNV	missense		V1600I
Zhang_2015	1120	SJHYPO040	chr1	27088784	C	T	ARID1A		1		Hypodiploid ALL	SNV	missense		P798L
Zhang_2015	1120	SJOS001120	chr1	27101022	A	G	ARID1A		1		Osteosarcoma	SNV	missense		Y1435C
Zhang_2015	1120	SJPHALL020034	chr1	27092783	A	G	ARID1A		1		BCR-ABL1 ALL	SNV	missense		N935S
Zhang_2015	1120	SJPHALL020042	chr1	27105521	G	C	ARID1A		1		BCR-ABL1 ALL	SNV	missense		G1494A
Zhang_2015	1120	SJACT067	chr12	46246255	G	A	ARID2		1		Adrenocortical Carcinoma	SNV	missense		G1450E
Zhang_2015	1120	SJACT068	chr12	46246067	T	G	ARID2		1		Adrenocortical Carcinoma	SNV	missense		N1387K
Zhang_2015	1120	SJEPD014	chr12	46244519	G	C	ARID2		1		Ependymoma	SNV	missense		Q871H
Zhang_2015	1120	SJERG029	chr12	46242673	G	A	ARID2		1		ALL with alterations of ERG	SNV	missense		M545I
Zhang_2015	1120	SJHGG057	chr12	46240639	C	G	ARID2		1		High Grade Glioma	SNV	missense		A500G
Zhang_2015	1120	SJHYPER043	chr12	46233172	C	T	ARID2		1		Hyperdiploid ALL	SNV	missense		A464V
Zhang_2015	1120	SJMB012	chr12	46246162	C	T	ARID2		1		Medulloblastoma	SNV	missense		P1419L
Zhang_2015	1120	SJNBL194	chr12	46244143	A	G	ARID2		1		Neuroblastoma	SNV	missense		N746S
Zhang_2015	1120	SJPHALL002	chr12	46245165	C	G	ARID2		1		BCR-ABL1 ALL	SNV	missense		P1087A
Zhang_2015	1120	SJPHALL010	chr12	46246491	G	A	ARID2		1		BCR-ABL1 ALL	SNV	missense		G1529R
Zhang_2015	1120	SJRHB033	chr12	46246491	G	A	ARID2		1		Rhabdosarcoma	SNV	missense		G1529R
Zhang_2015	1120	SJE2A017	chr20	31019211	A	C	ASXL1		1		B-Lineage ALL E2A-PBX1 Subtype	SNV	missense		N269T
Zhang_2015	1120	SJERG028	chr20	31019199	G	A	ASXL1		1		ALL with alterations of ERG	SNV	missense		R265H
Zhang_2015	1120	SJETV023	chr20	31015953	G	A	ASXL1		1		ETV6-RUNX1 ALL	SNV	missense		R92H
Zhang_2015	1120	SJETV077	chr20	31022346	G	A	ASXL1		1		ETV6-RUNX1 ALL	SNV	missense		A611T
Zhang_2015	1120	SJHGG077	chr20	31022713	A	T	ASXL1		1		High Grade Glioma	SNV	missense		Q733L
Zhang_2015	1120	SJHYPER084	chr20	31021523	C	T	ASXL1		1		Hyperdiploid ALL	SNV	missense		P508S
Zhang_2015	1120	SJHYPO051	chr20	31024858	A	G	ASXL1		1		Hypodiploid ALL	SNV	missense		Q1448R
Zhang_2015	1120	SJHYPO145	chr20	31017719	A	C	ASXL1		1		Hypodiploid ALL	SNV	missense		H194P
Zhang_2015	1120	SJMB018	chr20	31022346	G	A	ASXL1		1		Medulloblastoma	SNV	missense		A611T
Zhang_2015	1120	SJNBL004	chr20	31024492	C	G	ASXL1		1		Neuroblastoma	SNV	missense		P1326R
Zhang_2015	1120	SJNBL172	chr20	31024492	C	G	ASXL1		1		Neuroblastoma	SNV	missense		P1326R
Zhang_2015	1120	SJOS001107	chr20	31021634	C	T	ASXL1		1		Osteosarcoma	SNV	missense		R545C
Zhang_2015	1120	SJBALL020984	chr17	63534340	C	T	AXIN2		1		iAmp21 ALL	SNV	missense		R394H
Zhang_2015	1120	SJE2A014	chr17	63530067	G	A	AXIN2		1		B-Lineage ALL E2A-PBX1 Subtype	SNV	missense		H790Y
Zhang_2015	1120	SJE2A056	chr17	63545692	T	A	AXIN2		1		B-Lineage ALL E2A-PBX1 Subtype	SNV	missense		E301V
Zhang_2015	1120	SJMB020	chr17	63534340	C	T	AXIN2		1		Medulloblastoma	SNV	missense		R394H
Zhang_2015	1120	SJTALL089	chr17	63530196	G	A	AXIN2		1		T-cell ALL	SNV	missense		H747Y
Zhang_2015	1120	SJE2A011	chr2	215674267	GTTCCTCGGCTGCCG	-	BARD1		1		B-Lineage ALL E2A-PBX1 Subtype	SNV	proteinDel		R5_N9del
Zhang_2015	1120	SJEPD032	chr2	215657104	T	G	BARD1		1		Ependymoma	SNV	missense		D94A
Zhang_2015	1120	SJEWS001305	chr2	215645877	A	G	BARD1		1		Ewing's sarcoma	SNV	missense		S241P
Zhang_2015	1120	SJHGG071	chr2	215645939	A	G	BARD1		1		High Grade Glioma	SNV	missense		L220S
Zhang_2015	1120	SJLGG028	chr2	215595215	-	CTGTTCACATACTTTTCTTC	BARD1		1		Low Grade Glioma	SNV	frameshift		R641fs
Zhang_2015	1120	SJOS001109	chr2	215645351	A	C	BARD1		1		Osteosarcoma	SNV	missense		L416R
Zhang_2015	1120	SJRB003	chr2	215645514	A	C	BARD1		1		Retinoblastoma	SNV	missense		C362G
Zhang_2015	1120	SJTALL065	chr2	215645322	G	C	BARD1		1		T-cell ALL	SNV	missense		H426D
Zhang_2015	1120	SJACT069	chr22	23524349	A	T	BCR		1		Adrenocortical Carcinoma	SNV	missense		E401V
Zhang_2015	1120	SJHYPER011	chr22	23596048	C	T	BCR		1		Hyperdiploid ALL	SNV	missense		R448W
Zhang_2015	1120	SJNBL162	chr22	23523847	C	T	BCR		1		Neuroblastoma	SNV	missense		R234C
Zhang_2015	1120	SJPHALL018	chr22	23603617	-	GGCTCCTCC	BCR		1		BCR-ABL1 ALL	SNV	proteinIns		GSSinsF548
Zhang_2015	1120	SJE2A043	chr15	40500972	G	A	BUB1B		1		B-Lineage ALL E2A-PBX1 Subtype	SNV	splice		E715_E16splice
Zhang_2015	1120	SJEPD031	chr15	40477536	C	G	BUB1B		1		Ependymoma	SNV	missense		L308V
Zhang_2015	1120	SJNBL137	chr15	40494810	G	A	BUB1B		1		Neuroblastoma	SNV	missense		R550Q
Zhang_2015	1120	SJNBL159	chr15	40462838	C	T	BUB1B		1		Neuroblastoma	SNV	nonsense		R114*
Zhang_2015	1120	SJNBL178	chr15	40509770	C	G	BUB1B		1		Neuroblastoma	SNV	missense		L918V
Zhang_2015	1120	SJPHALL020046	chr15	40477786	C	T	BUB1B		1		BCR-ABL1 ALL	SNV	missense		P334L
Zhang_2015	1120	SJRB031	chr15	40501902	T	G	BUB1B		1		Retinoblastoma	SNV	nonsense		L737*
Zhang_2015	1120	SJRHB004	chr15	40488856	AGG	-	BUB1B		1		Rhabdosarcoma	SNV	proteinDel		E390_E391>E
Zhang_2015	1120	SJTALL005	chr15	40505636	A	G	BUB1B		1		T-cell ALL	SNV	missense		H880R
Zhang_2015	1120	SJACT061	chr1	7798213	G	A	CAMTA1		1		Adrenocortical Carcinoma	SNV	missense		E1285K
Zhang_2015	1120	SJBALL200	chr1	7723686	T	G	CAMTA1		1		BALL	SNV	missense		V360G
Zhang_2015	1120	SJCBF036	chr1	7724105	G	T	CAMTA1		1		Core binding factor AML	SNV	missense		G500C
Zhang_2015	1120	SJCBF137	chr1	7723884	A	G	CAMTA1		1		Core binding factor AML	SNV	missense		D426G
Zhang_2015	1120	SJE2A014	chr1	7724605	C	G	CAMTA1		1		B-Lineage ALL E2A-PBX1 Subtype	SNV	missense		I666M
Zhang_2015	1120	SJEPD003	chr1	7700526	G	A	CAMTA1		1		Ependymoma	SNV	missense		G193S
Zhang_2015	1120	SJERG011	chr1	7797482	G	T	CAMTA1		1		ALL with alterations of ERG	SNV	missense		E1170D
Zhang_2015	1120	SJETV084	chr1	7797373	G	A	CAMTA1		1		ETV6-RUNX1 ALL	SNV	missense		R1134H
Zhang_2015	1120	SJHYPER004	chr1	7796525	T	C	CAMTA1		1		Hyperdiploid ALL	SNV	missense		F1063S
Zhang_2015	1120	SJHYPER005	chr1	7723896	G	A	CAMTA1		1		Hyperdiploid ALL	SNV	missense		G430D
Zhang_2015	1120	SJLGG031	chr1	7724605	C	G	CAMTA1		1		Low Grade Glioma	SNV	missense		I666M
Zhang_2015	1120	SJNBL148	chr1	7798426	C	T	CAMTA1		1		Neuroblastoma	SNV	missense		R1356W
Zhang_2015	1120	SJOS001101	chr1	7725159	T	C	CAMTA1		1		Osteosarcoma	SNV	missense		V851A
Zhang_2015	1120	SJOS001106	chr1	7700514	G	A	CAMTA1		1		Osteosarcoma	SNV	missense		G189S
Zhang_2015	1120	SJOS001	chr1	7724105	G	T	CAMTA1		1		Osteosarcoma	SNV	missense		G500C
Zhang_2015	1120	SJAMLM7010475	chr16	88945680	C	T	CBFA2T3		1		Acute megakaryoblastic leukemia	SNV	missense		E554K
Zhang_2015	1120	SJBALL020383	chr16	88952492	G	A	CBFA2T3		1		ALL with alterations of ERG	SNV	missense		T257M
Zhang_2015	1120	SJBALL241	chr16	88945806	C	T	CBFA2T3		1		BALL	SNV	missense		A512T
Zhang_2015	1120	SJCBF123	chr16	88945811	G	A	CBFA2T3		1		Core binding factor AML	SNV	missense		S510L
Zhang_2015	1120	SJE2A056	chr16	88951466	G	A	CBFA2T3		1		B-Lineage ALL E2A-PBX1 Subtype	SNV	missense		H369Y
Zhang_2015	1120	SJMB004	chr16	88947822	C	T	CBFA2T3		1		Medulloblastoma	SNV	missense		D427N
Zhang_2015	1120	SJMLL013	chr16	88947187	C	T	CBFA2T3		1		Mixed Lineage Leukemia	SNV	missense		R471H
Zhang_2015	1120	SJNBL146	chr16	88947845	A	T	CBFA2T3		1		Neuroblastoma	SNV	missense		V419E
Zhang_2015	1120	SJRHB012	chr16	88952397	C	T	CBFA2T3		1		Rhabdosarcoma	SNV	missense		E289K
Zhang_2015	1120	SJTALL192	chr16	88951637	C	T	CBFA2T3		1		T-cell ALL	SNV	missense		E312K
Zhang_2015	1120	SJACT016	chr16	65016137	G	A	CDH11		1		Adrenocortical Carcinoma	SNV	missense		P356L
Zhang_2015	1120	SJACT017	chr16	65006833	T	C	CDH11		1		Adrenocortical Carcinoma	SNV	missense		N455S
Zhang_2015	1120	SJACT066	chr16	65005928	C	A	CDH11		1		Adrenocortical Carcinoma	SNV	missense		R477M
Zhang_2015	1120	SJBALL036	chr16	65032689	A	G	CDH11		1		BALL	SNV	missense		I100T
Zhang_2015	1120	SJHGG028	chr16	65005928	C	A	CDH11		1		High Grade Glioma	SNV	missense		R477M
Zhang_2015	1120	SJNBL134	chr16	64984825	G	T	CDH11		1		Neuroblastoma	SNV	missense		P580Q
Zhang_2015	1120	SJNBL164	chr16	65005547	C	A	CDH11		1		Neuroblastoma	SNV	missense		R526I
Zhang_2015	1120	SJCBF022	chr6	36652242	C	T	CDKN1A		1		Core binding factor AML	SNV	missense		R122C
Zhang_2015	1120	SJERG014	chr22	29091178	C	A	CHEK2		1		ALL with alterations of ERG	SNV	missense		D438Y
Zhang_2015	1120	SJERG014	chr22	29092931	C	A	CHEK2		1		ALL with alterations of ERG	SNV	missense		E351D
Zhang_2015	1120	SJERG020053	chr22	29090033	T	C	CHEK2		1		ALL with alterations of ERG	SNV	missense		H483R
Zhang_2015	1120	SJERG022	chr22	29107982	A	G	CHEK2		1		ALL with alterations of ERG	SNV	missense		L236P
Zhang_2015	1120	SJETV041	chr22	29106022	T	G	CHEK2		1		ETV6-RUNX1 ALL	SNV	missense		E273A
Zhang_2015	1120	SJEWS010371	chr22	29130463	GGTCCTCAGGTTCTT	-	CHEK2		1		Ewing's sarcoma	SNV	proteinDel		Q78_Q83>Q
Zhang_2015	1120	SJHGG047	chr22	29130546	G	A	CHEK2		1		High Grade Glioma	SNV	missense		S55F
Zhang_2015	1120	SJHGG083	chr22	29091178	C	A	CHEK2		1		High Grade Glioma	SNV	missense		D438Y
Zhang_2015	1120	SJHYPER010	chr22	29121265	C	T	CHEK2		1		Hyperdiploid ALL	SNV	missense		R137Q
Zhang_2015	1120	SJHYPER062	chr22	29083962	G	A	CHEK2		1		Hyperdiploid ALL	SNV	nonsense		R519*
Zhang_2015	1120	SJHYPO002	chr22	29130576	G	A	CHEK2		1		Hypodiploid ALL	SNV	missense		T45M
Zhang_2015	1120	SJHYPO041	chr22	29107974	C	T	CHEK2		1		Hypodiploid ALL	SNV	missense		E239K
Zhang_2015	1120	SJNBL002	chr22	29091220	A	G	CHEK2		1		Neuroblastoma	SNV	missense		Y467H
Zhang_2015	1120	SJNBL178	chr22	29130610	G	A	CHEK2		1		Neuroblastoma	SNV	nonsense		Q34*
Zhang_2015	1120	SJOS001126	chr22	29130442	G	A	CHEK2		1		Osteosarcoma	SNV	missense		P90S
Zhang_2015	1120	SJPHALL004	chr22	29091846	G	A	CHEK2		1		BCR-ABL1 ALL	SNV	missense		H371Y
Zhang_2015	1120	SJPHALL020036	chr22	29121016	G	A	CHEK2		1		BCR-ABL1 ALL	SNV	missense		R181C
Zhang_2015	1120	SJPHALL020047	chr22	29121266	G	A	CHEK2		1		BCR-ABL1 ALL	SNV	nonsense		R137*
Zhang_2015	1120	SJRHB020	chr22	29091228	A	-	CHEK2		1		Rhabdosarcoma	SNV	frameshift		L421fs
Zhang_2015	1120	SJBALL021516	chr16	3824628	C	G	CREBBP		1		ALL with alterations of ERG	SNV	missense		R742P
Zhang_2015	1120	SJBALL231	chr16	3789582	G	A	CREBBP		1		PH-LIKE	SNV	missense		T1426M
Zhang_2015	1120	SJCBF027	chr16	3779568	C	T	CREBBP		1		Core binding factor AML	SNV	missense		C1827Y
Zhang_2015	1120	SJEPD023	chr16	3777766	C	T	CREBBP		1		Ependymoma	SNV	missense		G2390R
Zhang_2015	1120	SJETV073	chr16	3823903	T	C	CREBBP		1		ETV6-RUNX1 ALL	SNV	missense		Q733R
Zhang_2015	1120	SJEWS010416	chr16	3781823	T	C	CREBBP		1		Ewing's sarcoma	SNV	missense		N1615S
Zhang_2015	1120	SJLGG033	chr16	3778051	G	T	CREBBP		1		Low Grade Glioma	SNV	missense		Q2295K
Zhang_2015	1120	SJOS016	chr16	3900335	G	A	CREBBP		1		Osteosarcoma	SNV	missense		A254V
Zhang_2015	1120	SJPHALL003	chr16	3900335	G	A	CREBBP		1		BCR-ABL1 ALL	SNV	missense		A254V
Zhang_2015	1120	SJRB001	chr16	3830806	A	G	CREBBP		1		Retinoblastoma	SNV	missense		S584P
Zhang_2015	1120	SJRB051	chr16	3778254	G	A	CREBBP		1		Retinoblastoma	SNV	missense		A2265V
Zhang_2015	1120	SJHGG040	chr16	50785524	C	T	CYLD		1		High Grade Glioma	SNV	missense		R172C
Zhang_2015	1120	SJMLL010	chr16	50785524	C	T	CYLD		1		Mixed Lineage Leukemia	SNV	missense		R172C
Zhang_2015	1120	SJRHB022	chr16	50826553	T	A	CYLD		1		Rhabdosarcoma	SNV	missense		F763I
Zhang_2015	1120	SJBALL021900	chr12	12022436	G	A	ETV6		1		iAmp21 ALL	SNV	missense		R181H
Zhang_2015	1120	SJCBF124	chr8	118847730	T	C	EXT1		1		Core binding factor AML	SNV	missense		N373D
Zhang_2015	1120	SJEWS010374	chr8	118812130	G	A	EXT1		1		Ewing's sarcoma	SNV	missense		R688W
Zhang_2015	1120	SJLGG002	chr8	118819590	C	G	EXT1		1		Low Grade Glioma	SNV	missense		Q583H
Zhang_2015	1120	SJRHB033	chr8	118819590	C	G	EXT1		1		Rhabdosarcoma	SNV	missense		Q583H
Zhang_2015	1120	SJBALL020635	chr11	44228363	C	T	EXT2		1		BALL	SNV	missense		R539W
Zhang_2015	1120	SJBALL083	chr11	44255774	C	T	EXT2		1		BALL	SNV	missense		T672M
Zhang_2015	1120	SJCBF108	chr11	44253925	G	A	EXT2		1		Core binding factor AML	SNV	missense		R595Q
Zhang_2015	1120	SJEPD001509	chr11	44146484	C	T	EXT2		1		Ependymoma	SNV	missense		R330C
Zhang_2015	1120	SJHYPO026	chr11	44253925	G	A	EXT2		1		Hypodiploid ALL	SNV	missense		R595Q
Zhang_2015	1120	SJINF039	chr11	44148391	G	A	EXT2		1		Infant ALL	SNV	missense		R355H
Zhang_2015	1120	SJMEL001005	chr11	44146514	G	A	EXT2		1		Melanoma	SNV	missense		D340N
Zhang_2015	1120	SJNBL036	chr11	44253909	C	T	EXT2		1		Neuroblastoma	SNV	missense		R567W
Zhang_2015	1120	SJTALL077	chr11	44129687	A	G	EXT2		1		T-cell ALL	SNV	missense		Y175C
Zhang_2015	1120	SJE2A014	chr3	59999813	C	T	FHIT		1		B-Lineage ALL E2A-PBX1 Subtype	SNV	missense		D57N
Zhang_2015	1120	SJNBL167	chr3	59999813	C	T	FHIT		1		Neuroblastoma	SNV	missense		D57N
Zhang_2015	1120	SJCBF122	chr17	17125860	G	T	FLCN		1		Core binding factor AML	SNV	missense		T245K
Zhang_2015	1120	SJEPD010	chr17	17124693	T	G	FLCN		1		Ependymoma	SNV	stop-loss		*343C
Zhang_2015	1120	SJERG007	chr17	17118544	A	G	FLCN		1		ALL with alterations of ERG	SNV	missense		Y463H
Zhang_2015	1120	SJHGG106	chr17	17122526	G	A	FLCN		1		High Grade Glioma	SNV	splice		D291_E9splice
Zhang_2015	1120	SJNBL034	chr17	17125879	G	A	FLCN		1		Neuroblastoma	SNV	missense		R239C
Zhang_2015	1120	SJACT061	chr13	41134823	G	A	FOXO1		1		Adrenocortical Carcinoma	SNV	nonsense		R269*
Zhang_2015	1120	SJETV078	chr13	41134762	C	A	FOXO1		1		ETV6-RUNX1 ALL	SNV	missense		G289V
Zhang_2015	1120	SJMLL008	chr13	41133773	G	A	FOXO1		1		Mixed Lineage Leukemia	SNV	missense		R619W
Zhang_2015	1120	SJMLL014	chr13	41134249	C	G	FOXO1		1		Mixed Lineage Leukemia	SNV	missense		G460A
Zhang_2015	1120	SJNBL025	chr13	41134828	C	T	FOXO1		1		Neuroblastoma	SNV	missense		R267Q
Zhang_2015	1120	SJTALL080	chr13	41134828	C	T	FOXO1		1		T-cell ALL	SNV	missense		R267Q
Zhang_2015	1120	SJBALL227	chr6	108985216	A	G	FOXO3		1		ALL with alterations of ERG	SNV	missense		I394V
Zhang_2015	1120	SJNBL041	chr6	108985216	A	G	FOXO3		1		Neuroblastoma	SNV	missense		I394V
Zhang_2015	1120	SJOS001125	chr6	108985051	G	A	FOXO3		1		Osteosarcoma	SNV	missense		D339N
Zhang_2015	1120	SJACT027	chrX	70321113	C	T	FOXO4		1		Adrenocortical Carcinoma	SNV	missense		L345F
Zhang_2015	1120	SJHGG067	chrX	132888183	G	A	GPC3		1		High Grade Glioma	SNV	missense		R120C
Zhang_2015	1120	SJHYPER102	chrX	132887934	G	A	GPC3		1		Hyperdiploid ALL	SNV	missense		R203C
Zhang_2015	1120	SJEPD001509	chr2	209104604	G	A	IDH1		1		Ependymoma	SNV	missense		T325M
Zhang_2015	1120	SJEWS010423	chr2	209108185	G	A	IDH1		1		Ewing's sarcoma	SNV	missense		R222C
Zhang_2015	1120	SJNBL027	chr2	209106841	T	C	IDH1		1		Neuroblastoma	SNV	missense		K243E
Zhang_2015	1120	SJNBL152	chr2	209116182	A	C	IDH1		1		Neuroblastoma	SNV	missense		F32V
Zhang_2015	1120	SJBALL020	chr6	160511091	G	A	IGF2R		1		BALL	SNV	missense		S2204N
Zhang_2015	1120	SJBALL020625	chr6	160477544	C	T	IGF2R		1		PH-LIKE	SNV	missense		T928M
Zhang_2015	1120	SJBALL020984	chr6	160525778	C	T	IGF2R		1		iAmp21 ALL	SNV	missense		R2380W
Zhang_2015	1120	SJBALL021427	chr6	160494361	G	A	IGF2R		1		ALL with alterations of ERG	SNV	missense		G1603S
Zhang_2015	1120	SJBALL239	chr6	160496991	C	T	IGF2R		1		iAmp21 ALL	SNV	missense		S1760L
Zhang_2015	1120	SJCBF035	chr6	160466894	C	T	IGF2R		1		Core binding factor AML	SNV	missense		T628M
Zhang_2015	1120	SJCBF099	chr6	160482612	G	A	IGF2R		1		Core binding factor AML	SNV	missense		D1114N
Zhang_2015	1120	SJCBF106	chr6	160490923	G	A	IGF2R		1		Core binding factor AML	SNV	missense		A1426T
Zhang_2015	1120	SJE2A003	chr6	160485861	A	G	IGF2R		1		B-Lineage ALL E2A-PBX1 Subtype	SNV	missense		D1348G
Zhang_2015	1120	SJE2A021	chr6	160494391	G	A	IGF2R		1		B-Lineage ALL E2A-PBX1 Subtype	SNV	missense		V1613M
Zhang_2015	1120	SJEPD001510	chr6	160525898	A	G	IGF2R		1		Ependymoma	SNV	missense		K2420E
Zhang_2015	1120	SJEPD001528	chr6	160485839	G	A	IGF2R		1		Ependymoma	SNV	missense		V1341I
Zhang_2015	1120	SJEPD012	chr6	160490959	G	A	IGF2R		1		Ependymoma	SNV	missense		G1438S
Zhang_2015	1120	SJEPD017	chr6	160524837	A	G	IGF2R		1		Ependymoma	SNV	missense		K2352R
Zhang_2015	1120	SJEPD024	chr6	160453698	A	G	IGF2R		1		Ependymoma	SNV	missense		E333G
Zhang_2015	1120	SJEPD025	chr6	160450674	C	T	IGF2R		1		Ependymoma	SNV	missense		S290L
Zhang_2015	1120	SJEPD040	chr6	160485912	A	G	IGF2R		1		Ependymoma	SNV	missense		D1365G
Zhang_2015	1120	SJHGG037	chr6	160461607	G	C	IGF2R		1		High Grade Glioma	SNV	missense		G444A
Zhang_2015	1120	SJHGG084	chr6	160523631	C	T	IGF2R		1		High Grade Glioma	SNV	missense		A2308V
Zhang_2015	1120	SJHGG102	chr6	160453635	G	A	IGF2R		1		High Grade Glioma	SNV	nonsense		W312*
Zhang_2015	1120	SJHGG102	chr6	160494475	C	T	IGF2R		1		High Grade Glioma	SNV	missense		H1641Y
Zhang_2015	1120	SJHYPER059	chr6	160525869	A	G	IGF2R		1		Hyperdiploid ALL	SNV	missense		E2410G
Zhang_2015	1120	SJHYPER085	chr6	160453974	G	A	IGF2R		1		Hyperdiploid ALL	SNV	splice		S350_E9splice
Zhang_2015	1120	SJHYPER150	chr6	160481731	G	A	IGF2R		1		Hyperdiploid ALL	SNV	missense		V1082M
Zhang_2015	1120	SJHYPO126	chr6	160464308	G	C	IGF2R		1		Hypodiploid ALL	SNV	missense		V537L
Zhang_2015	1120	SJHYPO147	chr6	160468364	A	G	IGF2R		1		Hypodiploid ALL	SNV	missense		Y742C
Zhang_2015	1120	SJLGG035	chr6	160468867	A	G	IGF2R		1		Low Grade Glioma	SNV	missense		Y758C
Zhang_2015	1120	SJMEL001003	chr6	160489369	C	T	IGF2R		1		Melanoma	SNV	missense		H1402Y
Zhang_2015	1120	SJMLL017	chr6	160493827	G	T	IGF2R		1		Mixed Lineage Leukemia	SNV	missense		G1534V
Zhang_2015	1120	SJNBL020	chr6	160464308	G	C	IGF2R		1		Neuroblastoma	SNV	missense		V537L
Zhang_2015	1120	SJNBL149	chr6	160448295	C	T	IGF2R		1		Neuroblastoma	SNV	missense		A242V
Zhang_2015	1120	SJNBL164	chr6	160481615	A	G	IGF2R		1		Neuroblastoma	SNV	missense		N1043S
Zhang_2015	1120	SJNBL183	chr6	160454060	CAA	-	IGF2R		1		Neuroblastoma	SNV	proteinDel		Q378del
Zhang_2015	1120	SJOS001101	chr6	160431751	T	G	IGF2R		1		Osteosarcoma	SNV	missense		C149W
Zhang_2015	1120	SJRB051	chr6	160500816	C	G	IGF2R		1		Retinoblastoma	SNV	missense		P1895A
Zhang_2015	1120	SJRHB001	chr6	160506054	A	G	IGF2R		1		Rhabdosarcoma	SNV	missense		I2032M
Zhang_2015	1120	SJRHB044	chr6	160480089	G	A	IGF2R		1		Rhabdosarcoma	SNV	missense		G1017D
Zhang_2015	1120	SJTALL007	chr6	160525898	A	C	IGF2R		1		T-cell ALL	SNV	missense		K2420Q
Zhang_2015	1120	SJTALL013	chr6	160492946	C	T	IGF2R		1		T-cell ALL	SNV	missense		S1483F
Zhang_2015	1120	SJMB016	chr10	3824144	G	A	KLF6		1		Medulloblastoma	SNV	missense		T122M
Zhang_2015	1120	SJACT027	chr12	59274410	T	C	LRIG3		1		Adrenocortical Carcinoma	SNV	missense		N585S
Zhang_2015	1120	SJBALL036	chr12	59272827	C	T	LRIG3		1		BALL	SNV	missense		R561H
Zhang_2015	1120	SJCBF001	chr12	59272711	C	T	LRIG3		1		Core binding factor AML	SNV	missense		V660M
Zhang_2015	1120	SJE2A034	chr12	59308056	G	C	LRIG3		1		B-Lineage ALL E2A-PBX1 Subtype	SNV	missense		L40V
Zhang_2015	1120	SJERG020300	chr12	59271512	G	A	LRIG3		1		ALL with alterations of ERG	SNV	missense		P676S
Zhang_2015	1120	SJNBL039	chr12	59271245	C	T	LRIG3		1		Neuroblastoma	SNV	missense		V765M
Zhang_2015	1120	SJNBL046	chr12	59313950	G	C	LRIG3		1		Neuroblastoma	SNV	missense		R23G
Zhang_2015	1120	SJNBL137	chr12	59267935	T	C	LRIG3		1		Neuroblastoma	SNV	missense		E946G
Zhang_2015	1120	SJNBL170	chr12	59272665	C	A	LRIG3		1		Neuroblastoma	SNV	missense		S615I
Zhang_2015	1120	SJTALL012	chr12	59284501	C	G	LRIG3		1		T-cell ALL	SNV	missense		S154T
Zhang_2015	1120	SJCBF137	chr20	39317268	G	A	MAFB		1		Core binding factor AML	SNV	missense		P75S
Zhang_2015	1120	SJHYPO006	chr20	39316879	GTTGCCGCCCGCCGCCGTCGCCGAGGCCGT	-	MAFB		1		Hypodiploid ALL	SNV	proteinDel		T195_N204del
Zhang_2015	1120	SJACT016	chr22	28195666	T	G	MN1		1		Adrenocortical Carcinoma	SNV	missense		H289P
Zhang_2015	1120	SJEPD034	chr22	28196248	T	C	MN1		1		Ependymoma	SNV	missense		Q95R
Zhang_2015	1120	SJHGG076	chr22	28194668	-	GCG	MN1		1		High Grade Glioma	SNV	proteinIns		RinsA622
Zhang_2015	1120	SJLGG030	chr22	28194668	-	GCG	MN1		1		Low Grade Glioma	SNV	proteinIns		RinsA622
Zhang_2015	1120	SJMLL010	chr22	28193658	GAA	-	MN1		1		Mixed Lineage Leukemia	SNV	proteinDel		F958del
Zhang_2015	1120	SJNBL133	chr22	28194801	C	G	MN1		1		Neuroblastoma	SNV	missense		Q577H
Zhang_2015	1120	SJOS001106	chr22	28147036	T	C	MN1		1		Osteosarcoma	SNV	missense		H1277R
Zhang_2015	1120	SJBALL020828	chr1	155159932	A	G	MUC1		1		ALL with alterations of ERG	SNV	missense		L129S
Zhang_2015	1120	SJCBF022	chr1	155159944	T	C	MUC1		1		Core binding factor AML	SNV	missense		Y125C
Zhang_2015	1120	SJHYPER011	chr1	155159944	T	C	MUC1		1		Hyperdiploid ALL	SNV	missense		Y125C
Zhang_2015	1120	SJHGG014	chr10	51582832	G	A	NCOA4		1		High Grade Glioma	SNV	missense		E219K
Zhang_2015	1120	SJLGG011	chr10	51585586	G	A	NCOA4		1		Low Grade Glioma	SNV	missense		R578Q
Zhang_2015	1120	SJNBL004	chr10	51584682	C	T	NCOA4		1		Neuroblastoma	SNV	missense		L277F
Zhang_2015	1120	SJNBL172	chr10	51584682	C	T	NCOA4		1		Neuroblastoma	SNV	missense		L277F
Zhang_2015	1120	SJRB039	chr10	51580896	A	C	NCOA4		1		Retinoblastoma	SNV	missense		N116T
Zhang_2015	1120	SJACT071	chr8	134271453	T	A	NDRG1		1		Adrenocortical Carcinoma	SNV	missense		D116V
Zhang_2015	1120	SJBALL021516	chr8	134251333	G	A	NDRG1		1		ALL with alterations of ERG	SNV	missense		R325W
Zhang_2015	1120	SJE2A024	chr8	134251219	G	A	NDRG1		1		B-Lineage ALL E2A-PBX1 Subtype	SNV	missense		R363C
Zhang_2015	1120	SJHGG037	chr8	134270628	T	C	NDRG1		1		High Grade Glioma	SNV	missense		Y144C
Zhang_2015	1120	SJHYPER117	chr8	134262695	T	C	NDRG1		1		Hyperdiploid ALL	SNV	missense		N229S
Zhang_2015	1120	SJMB009	chr8	134251285	G	A	NDRG1		1		Medulloblastoma	SNV	missense		R341C
Zhang_2015	1120	SJNBL010	chr8	134251279	G	A	NDRG1		1		Neuroblastoma	SNV	missense		R343C
Zhang_2015	1120	SJNBL016	chr8	134260149	A	G	NDRG1		1		Neuroblastoma	SNV	missense		V259A
Zhang_2015	1120	SJNBL189	chr8	134260131	G	A	NDRG1		1		Neuroblastoma	SNV	missense		A265V
Zhang_2015	1120	SJBALL021130	chr9	139393401	C	T	NOTCH1		1		ALL with alterations of ERG	SNV	missense		A2044T
Zhang_2015	1120	SJBALL021299	chr9	139400180	G	T	NOTCH1		1		ALL with alterations of ERG	SNV	missense		P1390T
Zhang_2015	1120	SJCBF008	chr9	139391442	G	A	NOTCH1		1		Core binding factor AML	SNV	missense		A2250V
Zhang_2015	1120	SJCBF142	chr9	139401023	C	A	NOTCH1		1		Core binding factor AML	SNV	missense		V1324L
Zhang_2015	1120	SJCPC001012	chr9	139418261	T	C	NOTCH1		1		Choroid Plexus Carcinoma	SNV	missense		N104S
Zhang_2015	1120	SJE2A007	chr9	139399495	T	C	NOTCH1		1		B-Lineage ALL E2A-PBX1 Subtype	SNV	missense		N1550D
Zhang_2015	1120	SJE2A022	chr9	139404272	G	A	NOTCH1		1		B-Lineage ALL E2A-PBX1 Subtype	SNV	missense		T961M
Zhang_2015	1120	SJE2A025	chr9	139417343	C	T	NOTCH1		1		B-Lineage ALL E2A-PBX1 Subtype	SNV	missense		R234H
Zhang_2015	1120	SJE2A059	chr9	139402435	G	A	NOTCH1		1		B-Lineage ALL E2A-PBX1 Subtype	SNV	missense		T1161M
Zhang_2015	1120	SJE2A064	chr9	139400252	C	T	NOTCH1		1		B-Lineage ALL E2A-PBX1 Subtype	SNV	missense		G1366S
Zhang_2015	1120	SJEPD001534	chr9	139400180	G	T	NOTCH1		1		Ependymoma	SNV	missense		P1390T
Zhang_2015	1120	SJEPD002	chr9	139410001	G	A	NOTCH1		1		Ependymoma	SNV	missense		R613C
Zhang_2015	1120	SJETV021	chr9	139399351	G	A	NOTCH1		1		ETV6-RUNX1 ALL	SNV	missense		R1598C
Zhang_2015	1120	SJETV074	chr9	139393422	C	A	NOTCH1		1		ETV6-RUNX1 ALL	SNV	missense		A2037S
Zhang_2015	1120	SJETV136	chr9	139391211	C	T	NOTCH1		1		ETV6-RUNX1 ALL	SNV	missense		R2327Q
Zhang_2015	1120	SJEWS001314	chr9	139404272	G	A	NOTCH1		1		Ewing's sarcoma	SNV	missense		T961M
Zhang_2015	1120	SJHGG025	chr9	139396511	A	G	NOTCH1		1		High Grade Glioma	SNV	missense		L1805P
Zhang_2015	1120	SJHGG115	chr9	139390585	C	T	NOTCH1		1		High Grade Glioma	SNV	missense		V2536I
Zhang_2015	1120	SJHGG115	chr9	139399976	C	T	NOTCH1		1		High Grade Glioma	SNV	missense		A1458T
Zhang_2015	1120	SJHYPER055	chr9	139396835	C	T	NOTCH1		1		Hyperdiploid ALL	SNV	missense		R1758H
Zhang_2015	1120	SJHYPER077	chr9	139401013	T	C	NOTCH1		1		Hyperdiploid ALL	SNV	missense		N1327S
Zhang_2015	1120	SJHYPO124	chr9	139401013	T	C	NOTCH1		1		Hypodiploid ALL	SNV	missense		N1327S
Zhang_2015	1120	SJLGG019	chr9	139417370	G	C	NOTCH1		1		Low Grade Glioma	SNV	missense		S225W
Zhang_2015	1120	SJMB004	chr9	139410001	G	A	NOTCH1		1		Medulloblastoma	SNV	missense		R613C
Zhang_2015	1120	SJMLL016	chr9	139391721	T	G	NOTCH1		1		Mixed Lineage Leukemia	SNV	missense		K2157T
Zhang_2015	1120	SJMLL022	chr9	139410438	G	A	NOTCH1		1		Mixed Lineage Leukemia	SNV	missense		T555M
Zhang_2015	1120	SJNBL042	chr9	139395162	G	A	NOTCH1		1		Neuroblastoma	SNV	missense		R1926C
Zhang_2015	1120	SJNBL161	chr9	139399348	C	T	NOTCH1		1		Neuroblastoma	SNV	missense		V1599M
Zhang_2015	1120	SJNBL170	chr9	139399401	G	A	NOTCH1		1		Neuroblastoma	SNV	missense		P1581L
Zhang_2015	1120	SJOS001118	chr9	139404410	G	A	NOTCH1		1		Osteosarcoma	SNV	missense		P915L
Zhang_2015	1120	SJPHALL020047	chr9	139404291	G	A	NOTCH1		1		BCR-ABL1 ALL	SNV	missense		R955C
Zhang_2015	1120	SJPHALL026	chr9	139391670	T	C	NOTCH1		1		BCR-ABL1 ALL	SNV	missense		K2174R
Zhang_2015	1120	SJRHB046	chr9	139399401	G	A	NOTCH1		1		Rhabdosarcoma	SNV	missense		P1581L
Zhang_2015	1120	SJTALL068	chr9	139391710	G	A	NOTCH1		1		T-cell ALL	SNV	missense		P2161S
Zhang_2015	1120	SJBALL013	chr9	102590746	C	G	NR4A3		1		BALL	SNV	missense		S141C
Zhang_2015	1120	SJACT015	chr3	52649460	C	T	PBRM1		1		Adrenocortical Carcinoma	SNV	missense		A611T
Zhang_2015	1120	SJAMLM7010480	chr3	52610632	G	A	PBRM1		1		Acute megakaryoblastic leukemia	SNV	missense		P1206S
Zhang_2015	1120	SJBALL036	chr3	52643473	G	A	PBRM1		1		BALL	SNV	missense		P808L
Zhang_2015	1120	SJEPD028	chr3	52582092	A	G	PBRM1		1		Ependymoma	SNV	missense		L1579P
Zhang_2015	1120	SJHYPO056	chr3	52595971	G	A	PBRM1		1		Hypodiploid ALL	SNV	missense		S1367F
Zhang_2015	1120	SJLGG001	chr3	52643617	C	T	PBRM1		1		Low Grade Glioma	SNV	missense		R760H
Zhang_2015	1120	SJRB001130	chr3	52643767	C	T	PBRM1		1		Retinoblastoma	SNV	missense		R710Q
Zhang_2015	1120	SJBALL062	chr15	74327586	CCCACTCCTCGCCAG	-	PML		1		BALL	SNV	proteinDel		A595_V600>V
Zhang_2015	1120	SJCBF041	chr15	74337074	C	-	PML		1		Core binding factor AML	SNV	frameshift		R792fs
Zhang_2015	1120	SJE2A057	chr15	74327779	G	-	PML		1		B-Lineage ALL E2A-PBX1 Subtype	SNV	frameshift		L659fs
Zhang_2015	1120	SJE2A062	chr15	74327586	CCCACTCCTCGCCAG	-	PML		1		B-Lineage ALL E2A-PBX1 Subtype	SNV	proteinDel		A595_V600>V
Zhang_2015	1120	SJETV096	chr15	74337087	G	A	PML		1		ETV6-RUNX1 ALL	SNV	missense		R796H
Zhang_2015	1120	SJEWS001310	chr15	74327801	C	-	PML		1		Ewing's sarcoma	SNV	frameshift		R667fs
Zhang_2015	1120	SJHGG106	chr15	74327912	C	T	PML		1		High Grade Glioma	SNV	missense		H704Y
Zhang_2015	1120	SJHYPO013	chr15	74336740	G	A	PML		1		Hypodiploid ALL	SNV	nonsense		W680*
Zhang_2015	1120	SJLGG011	chr15	74336964	G	A	PML		1		Low Grade Glioma	SNV	missense		R755H
Zhang_2015	1120	SJMLL001	chr15	74327586	CCCACTCCTCGCCAG	-	PML		1		Mixed Lineage Leukemia	SNV	proteinDel		A595_V600>V
Zhang_2015	1120	SJACT004	chr2	190656641	G	A	PMS1		1		Adrenocortical Carcinoma	SNV	missense		G36S
Zhang_2015	1120	SJCBF111	chr2	190732623	C	G	PMS1		1		Core binding factor AML	SNV	missense		T814R
Zhang_2015	1120	SJE2A010	chr2	190742119	G	A	PMS1		1		B-Lineage ALL E2A-PBX1 Subtype	SNV	missense		R919H
Zhang_2015	1120	SJNBL141	chr2	190717435	C	G	PMS1		1		Neuroblastoma	SNV	missense		L252V
Zhang_2015	1120	SJNBL161	chr2	190717450	A	G	PMS1		1		Neuroblastoma	SNV	missense		R257G
Zhang_2015	1120	SJNBL187	chr2	190742011	G	A	PMS1		1		Neuroblastoma	SNV	missense		R883H
Zhang_2015	1120	SJCBF152	chr6	106547228	A	T	PRDM1		1		Core binding factor AML	SNV	missense		K155N
Zhang_2015	1120	SJE2A009	chr6	106554318	G	A	PRDM1		1		B-Lineage ALL E2A-PBX1 Subtype	SNV	missense		A616T
Zhang_2015	1120	SJE2A043	chr6	106553405	C	G	PRDM1		1		B-Lineage ALL E2A-PBX1 Subtype	SNV	missense		P457R
Zhang_2015	1120	SJERG020053	chr6	106553629	A	C	PRDM1		1		ALL with alterations of ERG	SNV	missense		K532Q
Zhang_2015	1120	SJERG020305	chr6	106554936	C	T	PRDM1		1		ALL with alterations of ERG	SNV	missense		R685W
Zhang_2015	1120	SJNBL004	chr6	106553588	C	T	PRDM1		1		Neuroblastoma	SNV	missense		T518M
Zhang_2015	1120	SJNBL004	chr6	106555348	C	T	PRDM1		1		Neuroblastoma	SNV	missense		P822L
Zhang_2015	1120	SJNBL172	chr6	106555348	C	T	PRDM1		1		Neuroblastoma	SNV	missense		P822L
Zhang_2015	1120	SJEPD029	chr7	128850925	T	G	SMO		1		Ependymoma	SNV	missense		M591R
Zhang_2015	1120	SJHGG022	chr7	128850296	T	C	SMO		1		High Grade Glioma	SNV	missense		I520T
Zhang_2015	1120	SJNBL192	chr7	128850945	G	A	SMO		1		Neuroblastoma	SNV	missense		G598R
Zhang_2015	1120	SJBALL021893	chr9	93624488	G	T	SYK		1		TCF3	SNV	splice		I194_E4splice
Zhang_2015	1120	SJBALL021893	chr9	93641056	G	C	SYK		1		TCF3	SNV	missense		D468H
Zhang_2015	1120	SJHYPER111	chr9	93606383	G	A	SYK		1		Hyperdiploid ALL	SNV	missense		R68Q
Zhang_2015	1120	SJLGG002	chr9	93606509	C	T	SYK		1		Low Grade Glioma	SNV	missense		P110L
Zhang_2015	1120	SJRB001130	chr9	93606485	T	G	SYK		1		Retinoblastoma	SNV	missense		L102R
Zhang_2015	1120	SJRHB044	chr9	93627350	C	T	SYK		1		Rhabdosarcoma	SNV	missense		R273C
Zhang_2015	1120	SJBALL230	chr4	106197557	T	C	TET2		1		ALL with alterations of ERG	SNV	missense		Y1964H
Zhang_2015	1120	SJBALL271	chr4	106157485	G	C	TET2		1		BALL	SNV	missense		E796Q
Zhang_2015	1120	SJCBF024	chr4	106158127	G	A	TET2		1		Core binding factor AML	SNV	missense		E1010K
Zhang_2015	1120	SJCBF025	chr4	106158395	C	T	TET2		1		Core binding factor AML	SNV	missense		S1099F
Zhang_2015	1120	SJHGG051	chr4	106156792	A	G	TET2		1		High Grade Glioma	SNV	missense		I565V
Zhang_2015	1120	SJHYPER120	chr4	106196396	A	C	TET2		1		Hyperdiploid ALL	SNV	missense		S1577R
Zhang_2015	1120	SJHYPER146	chr4	106157831	C	A	TET2		1		Hyperdiploid ALL	SNV	missense		A911D
Zhang_2015	1120	SJLGG002	chr4	106196463	C	G	TET2		1		Low Grade Glioma	SNV	missense		S1599C
Zhang_2015	1120	SJNBL167	chr4	106158395	C	T	TET2		1		Neuroblastoma	SNV	missense		S1099F
Zhang_2015	1120	SJPHALL020035	chr4	106197552	C	T	TET2		1		BCR-ABL1 ALL	SNV	missense		P1962L
Zhang_2015	1120	SJHGG021	chrX	48895880	C	T	TFE3		1		High Grade Glioma	SNV	missense		G208R
Zhang_2015	1120	SJE2A025	chr6	138196150	C	T	TNFAIP3		1		B-Lineage ALL E2A-PBX1 Subtype	SNV	missense		T155M
Zhang_2015	1120	SJEWS010424	chr6	138192658	C	A	TNFAIP3		1		Ewing's sarcoma	SNV	missense		N98K
Zhang_2015	1120	SJHGG045	chr6	138202244	T	C	TNFAIP3		1		High Grade Glioma	SNV	missense		C721R
Zhang_2015	1120	SJHYPO051	chr6	138196150	C	T	TNFAIP3		1		Hypodiploid ALL	SNV	missense		T155M
Zhang_2015	1120	SJLGG008	chr6	138200470	G	A	TNFAIP3		1		Low Grade Glioma	SNV	missense		E630K
Zhang_2015	1120	SJRHB026	chr6	138200446	G	A	TNFAIP3		1		Rhabdosarcoma	SNV	missense		G622S
Zhang_2015	1120	SJBALL020340	chr7	138239586	C	T	TRIM24		1		ALL with alterations of ERG	SNV	missense		R469W
Zhang_2015	1120	SJETV095	chr7	138239655	G	C	TRIM24		1		ETV6-RUNX1 ALL	SNV	missense		G492R
Zhang_2015	1120	SJRHB054	chr7	138252253	C	G	TRIM24		1		Rhabdosarcoma	SNV	missense		Q486E
Zhang_2015	1120	SJNBL021	chr12	65471604	G	A	WIF1		1		Neuroblastoma	SNV	missense		R107C
Zhang_2015	1120	SJHYPO055	chr11	113934884	G	A	ZBTB16		1		Hypodiploid ALL	SNV	missense		V288I
Zhang_2015	1120	SJBALL020649	chr9	133760094	C	T	ABL1		1		PH-LIKE	SNV	missense		P825L
Zhang_2015	1120	SJBALL021373	chr9	133759812	G	A	ABL1		1		iAmp21 ALL	SNV	missense		R731H
Zhang_2015	1120	SJBALL201	chr9	133729449	A	G	ABL1		1		BALL	SNV	splice		E46_E2splice
Zhang_2015	1120	SJHGG004	chr9	133760034	T	C	ABL1		1		High Grade Glioma	SNV	missense		L805P
Zhang_2015	1120	SJHYPER119	chr9	133759398	G	A	ABL1		1		Hyperdiploid ALL	SNV	missense		R593Q
Zhang_2015	1120	SJHYPO140	chr9	133753948	C	G	ABL1		1		Hypodiploid ALL	SNV	missense		R492G
Zhang_2015	1120	SJACT017	chr1	179078178	C	-	ABL2		1		Adrenocortical Carcinoma	SNV	frameshift		G742fs
Zhang_2015	1120	SJBALL153	chr1	179077659	A	G	ABL2		1		PH-LIKE	SNV	missense		S915P
Zhang_2015	1120	SJHYPER087	chr1	179086507	A	T	ABL2		1		Hyperdiploid ALL	SNV	missense		S435R
Zhang_2015	1120	SJHYPO125	chr1	179079976	GAG	-	ABL2		1		Hypodiploid ALL	SNV	proteinDel		L531del
Zhang_2015	1120	SJLGG020	chr1	179112158	GGA	-	ABL2		1		Low Grade Glioma	SNV	proteinDel		L7_L8>L
Zhang_2015	1120	SJNBL164	chr1	179078412	-	GGGGGTG	ABL2		1		Neuroblastoma	SNV	frameshift		T664fs
Zhang_2015	1120	SJPHALL009	chr1	179078129	T	C	ABL2		1		BCR-ABL1 ALL	SNV	missense		K758R
Zhang_2015	1120	SJAMLM7013	chr7	55249071	C	T	EGFR		1		Acute megakaryoblastic leukemia	SNV	missense		T790M
Zhang_2015	1120	SJBALL020118	chr7	55223639	G	C	EGFR		1		BALL	SNV	missense		V336L
Zhang_2015	1120	SJBALL218	chr7	55268045	G	A	EGFR		1		ALL with alterations of ERG	SNV	missense		R962H
Zhang_2015	1120	SJHGG022	chr7	55259485	C	T	EGFR		1		High Grade Glioma	SNV	missense		P848L
Zhang_2015	1120	SJHGG093	chr7	55273279	C	T	EGFR		1		High Grade Glioma	SNV	missense		A1201V
Zhang_2015	1120	SJHYPER085	chr7	55249019	C	G	EGFR		1		Hyperdiploid ALL	SNV	missense		H773D
Zhang_2015	1120	SJINF018	chr7	55268930	G	A	EGFR		1		Infant ALL	SNV	missense		R999H
Zhang_2015	1120	SJMB008	chr7	55231509	C	G	EGFR		1		Medulloblastoma	SNV	missense		T572R
Zhang_2015	1120	SJNBL156	chr7	55240794	C	T	EGFR		1		Neuroblastoma	SNV	missense		R680W
Zhang_2015	1120	SJNBL194	chr7	55259485	C	T	EGFR		1		Neuroblastoma	SNV	missense		P848L
Zhang_2015	1120	SJBALL014	chr17	37873679	A	G	ERBB2		1		BALL	SNV	missense		K615R
Zhang_2015	1120	SJCBF004	chr17	37868649	G	C	ERBB2		1		Core binding factor AML	SNV	missense		G336R
Zhang_2015	1120	SJCBF100	chr17	37872607	C	T	ERBB2		1		Core binding factor AML	SNV	missense		P523S
Zhang_2015	1120	SJE2A065	chr17	37884259	G	A	ERBB2		1		B-Lineage ALL E2A-PBX1 Subtype	SNV	missense		E1244K
Zhang_2015	1120	SJEPD001508	chr17	37868271	G	A	ERBB2		1		Ependymoma	SNV	missense		C331Y
Zhang_2015	1120	SJEPD011	chr17	37884013	C	T	ERBB2		1		Ependymoma	SNV	missense		P1162S
Zhang_2015	1120	SJERG019	chr17	37883693	C	T	ERBB2		1		ALL with alterations of ERG	SNV	missense		P1102L
Zhang_2015	1120	SJEWS010372	chr17	37883719	C	T	ERBB2		1		Ewing's sarcoma	SNV	missense		R1111W
Zhang_2015	1120	SJHGG014	chr17	37863281	A	G	ERBB2		1		High Grade Glioma	SNV	missense		S38G
Zhang_2015	1120	SJHYPER003	chr17	37866429	C	T	ERBB2		1		Hyperdiploid ALL	SNV	missense		T245M
Zhang_2015	1120	SJPHALL020	chr17	37881006	T	A	ERBB2		1		BCR-ABL1 ALL	SNV	missense		S779T
Zhang_2015	1120	SJPHALL022	chr17	37879903	CA	-	ERBB2		1		BCR-ABL1 ALL	SNV	frameshift		T733fs
Zhang_2015	1120	SJBALL102	chr8	38272320	C	T	FGFR1		1		iAmp21 ALL	SNV	missense		D650N
Zhang_2015	1120	SJCPC001011	chr8	38275808	C	A	FGFR1		1		Choroid Plexus Carcinoma	SNV	missense		M454I
Zhang_2015	1120	SJEPD007	chr8	38275420	C	T	FGFR1		1		Ependymoma	SNV	missense		R505H
Zhang_2015	1120	SJLGG027	chr8	38282064	A	G	FGFR1		1		Low Grade Glioma	SNV	missense		I298T
Zhang_2015	1120	SJLGG042	chr8	38282064	A	G	FGFR1		1		Low Grade Glioma	SNV	missense		I298T
Zhang_2015	1120	SJMLL003	chr8	38275827	G	A	FGFR1		1		Mixed Lineage Leukemia	SNV	missense		S448F
Zhang_2015	1120	SJTALL075	chr8	38287254	C	T	FGFR1		1		T-cell ALL	SNV	missense		V102I
Zhang_2015	1120	SJLGG030	chr10	123241686	T	C	FGFR2		1		Low Grade Glioma	SNV	stop-loss		*770W
Zhang_2015	1120	SJNBL134	chr10	123325146	C	A	FGFR2		1		Neuroblastoma	SNV	missense		R61L
Zhang_2015	1120	SJPHALL002	chr10	123310895	C	T	FGFR2		1		BCR-ABL1 ALL	SNV	missense		R178H
Zhang_2015	1120	SJBALL020625	chr4	1803364	G	A	FGFR3		1		PH-LIKE	SNV	nonsense		W211*
Zhang_2015	1120	SJBALL102	chr4	1808594	C	A	FGFR3		1		iAmp21 ALL	SNV	missense		S736Y
Zhang_2015	1120	SJE2A029	chr4	1803456	C	T	FGFR3		1		B-Lineage ALL E2A-PBX1 Subtype	SNV	missense		T242M
Zhang_2015	1120	SJINF061	chr4	1806663	C	T	FGFR3		1		Infant ALL	SNV	missense		P460L
Zhang_2015	1120	SJCBF097	chr13	28589841	G	A	FLT3		1		Core binding factor AML	SNV	splice		A848_E21splice
Zhang_2015	1120	SJCBF110	chr13	28611336	G	A	FLT3		1		Core binding factor AML	SNV	missense		T432M
Zhang_2015	1120	SJE2A028	chr13	28609748	-	CCAC	FLT3		1		B-Lineage ALL E2A-PBX1 Subtype	SNV	frameshift		Q494fs
Zhang_2015	1120	SJEWS001318	chr13	28623625	C	A	FLT3		1		Ewing's sarcoma	SNV	missense		R311L
Zhang_2015	1120	SJHGG089	chr13	28608290	T	A	FLT3		1		High Grade Glioma	SNV	missense		Y589F
Zhang_2015	1120	SJBALL083	chr5	156675988	T	C	ITK		1		BALL	SNV	missense		Y588H
Zhang_2015	1120	SJETV032	chr5	156671447	A	C	ITK		1		ETV6-RUNX1 ALL	SNV	missense		M470L
Zhang_2015	1120	SJRHB009	chr5	156672895	G	T	ITK		1		Rhabdosarcoma	SNV	missense		V507F
Zhang_2015	1120	SJRB001130	chr1	65301849	C	G	JAK1		1		Retinoblastoma	SNV	missense		V1064L
Zhang_2015	1120	SJBALL200	chr9	5090541	C	A	JAK2		1		BALL	SNV	missense		L953I
Zhang_2015	1120	SJEPD001510	chr9	5065000	G	A	JAK2		1		Ependymoma	SNV	missense		V392M
Zhang_2015	1120	SJEPD009	chr9	5090524	G	A	JAK2		1		Ependymoma	SNV	missense		R947Q
Zhang_2015	1120	SJHGG093	chr9	5080654	T	C	JAK2		1		High Grade Glioma	SNV	missense		I802T
Zhang_2015	1120	SJMLL016	chr9	5081828	G	C	JAK2		1		Mixed Lineage Leukemia	SNV	missense		E846D
Zhang_2015	1120	SJNBL179	chr9	5072576	A	G	JAK2		1		Neuroblastoma	SNV	missense		T576A
Zhang_2015	1120	SJBALL020828	chr19	17953321	C	T	JAK3		1		ALL with alterations of ERG	SNV	missense		R222H
Zhang_2015	1120	SJBALL231	chr19	17945949	G	T	JAK3		1		PH-LIKE	SNV	missense		P664T
Zhang_2015	1120	SJHYPER128	chr19	17941341	A	G	JAK3		1		Hyperdiploid ALL	SNV	missense		Y1023H
Zhang_2015	1120	SJHYPER150	chr19	17954707	T	C	JAK3		1		Hyperdiploid ALL	SNV	missense		I63V
Zhang_2015	1120	SJHYPO039	chr19	17946006	G	A	JAK3		1		Hypodiploid ALL	SNV	missense		H645Y
Zhang_2015	1120	SJNBL002	chr19	17937710	G	A	JAK3		1		Neuroblastoma	SNV	missense		L1073F
Zhang_2015	1120	SJNBL164	chr19	17954707	T	C	JAK3		1		Neuroblastoma	SNV	missense		I63V
Zhang_2015	1120	SJEWS010362	chr4	55946242	C	T	KDR		1		Ewing's sarcoma	SNV	missense		D1313N
Zhang_2015	1120	SJEWS010424	chr4	55953885	A	G	KDR		1		Ewing's sarcoma	SNV	missense		L1184S
Zhang_2015	1120	SJINF039	chr4	55964357	C	T	KDR		1		Infant ALL	SNV	missense		R819Q
Zhang_2015	1120	SJNBL012	chr4	55972049	G	A	KDR		1		Neuroblastoma	SNV	missense		A532V
Zhang_2015	1120	SJNBL027	chr4	55946253	T	C	KDR		1		Neuroblastoma	SNV	missense		Y1309C
Zhang_2015	1120	SJOS001104	chr4	55961818	T	C	KDR		1		Osteosarcoma	SNV	missense		I915V
Zhang_2015	1120	SJOS015	chr4	55973991	G	A	KDR		1		Osteosarcoma	SNV	missense		T442M
Zhang_2015	1120	SJTALL216	chr4	55955634	G	T	KDR		1		T-cell ALL	SNV	missense		S1104Y
Zhang_2015	1120	SJBALL074	chr4	55599347	G	A	KIT		1		BALL	SNV	missense		V821I
Zhang_2015	1120	SJCBF031	chr4	55604659	G	A	KIT		1		Core binding factor AML	SNV	missense		R956Q
Zhang_2015	1120	SJCPC001012	chr4	55593628	G	T	KIT		1		Choroid Plexus Carcinoma	SNV	missense		G561V
Zhang_2015	1120	SJHGG009	chr4	55602891	C	G	KIT		1		High Grade Glioma	SNV	missense		S867R
Zhang_2015	1120	SJHYPER089	chr4	55564503	G	A	KIT		1		Hyperdiploid ALL	SNV	missense		D131N
Zhang_2015	1120	SJMLL017	chr4	55575669	G	A	KIT		1		Mixed Lineage Leukemia	SNV	missense		V399I
Zhang_2015	1120	SJNBL015	chr4	55575669	G	A	KIT		1		Neuroblastoma	SNV	missense		V399I
Zhang_2015	1120	SJHGG080	chr1	32745595	G	A	LCK		1		High Grade Glioma	SNV	missense		G399R
Zhang_2015	1120	SJOS004	chr1	32740398	C	T	LCK		1		Osteosarcoma	SNV	missense		P56S
Zhang_2015	1120	SJBALL021514	chr7	116436146	A	G	MET		1		ALL with alterations of ERG	SNV	missense		T1399A
Zhang_2015	1120	SJBALL102	chr7	116339544	G	A	MET		1		iAmp21 ALL	SNV	missense		V136I
Zhang_2015	1120	SJE2A043	chr7	116339427	C	G	MET		1		B-Lineage ALL E2A-PBX1 Subtype	SNV	missense		P97A
Zhang_2015	1120	SJHGG041	chr7	116339745	T	A	MET		1		High Grade Glioma	SNV	missense		S203T
Zhang_2015	1120	SJLGG020	chr7	116436096	C	T	MET		1		Low Grade Glioma	SNV	missense		P1382L
Zhang_2015	1120	SJMB009	chr7	116418845	G	C	MET		1		Medulloblastoma	SNV	missense		G1137A
Zhang_2015	1120	SJNBL003	chr7	116419010	A	G	MET		1		Neuroblastoma	SNV	missense		H1192R
Zhang_2015	1120	SJNBL033	chr7	116340024	C	G	MET		1		Neuroblastoma	SNV	missense		L296V
Zhang_2015	1120	SJPHALL021	chr7	116339209	G	A	MET		1		BCR-ABL1 ALL	SNV	missense		G24E
Zhang_2015	1120	SJBALL021130	chr1	156851414	T	C	NTRK1		1		ALL with alterations of ERG	SNV	missense		Y755H
Zhang_2015	1120	SJE2A001	chr1	156841548	G	C	NTRK1		1		B-Lineage ALL E2A-PBX1 Subtype	SNV	splice		F254_E8splice
Zhang_2015	1120	SJE2A026	chr1	156838333	C	T	NTRK1		1		B-Lineage ALL E2A-PBX1 Subtype	SNV	missense		S174L
Zhang_2015	1120	SJETV082	chr1	156838362	C	T	NTRK1		1		ETV6-RUNX1 ALL	SNV	missense		R184W
Zhang_2015	1120	SJHGG010325	chr1	156849849	G	A	NTRK1		1		High Grade Glioma	SNV	missense		R666H
Zhang_2015	1120	SJHGG029	chr1	156844187	C	T	NTRK1		1		High Grade Glioma	SNV	missense		P397L
Zhang_2015	1120	SJHGG084	chr1	156834189	G	T	NTRK1		1		High Grade Glioma	SNV	missense		D56Y
Zhang_2015	1120	SJHYPER114	chr1	156837949	G	A	NTRK1		1		Hyperdiploid ALL	SNV	missense		R131H
Zhang_2015	1120	SJINF001	chr1	156845399	G	A	NTRK1		1		Infant ALL	SNV	missense		G445D
Zhang_2015	1120	SJNBL168	chr1	156838333	C	T	NTRK1		1		Neuroblastoma	SNV	missense		S174L
Zhang_2015	1120	SJOS001111	chr1	156844766	C	G	NTRK1		1		Osteosarcoma	SNV	missense		N404K
Zhang_2015	1120	SJBALL020828	chr15	88678541	G	A	NTRK3		1		ALL with alterations of ERG	SNV	missense		T332M
Zhang_2015	1120	SJEWS010366	chr15	88524513	T	C	NTRK3		1		Ewing's sarcoma	SNV	missense		Y555C
Zhang_2015	1120	SJHYPO044	chr15	88472621	C	T	NTRK3		1		Hypodiploid ALL	SNV	missense		R645H
Zhang_2015	1120	SJMB032	chr15	88670397	A	T	NTRK3		1		Medulloblastoma	SNV	missense		F430Y
Zhang_2015	1120	SJPHALL029	chr15	88679231	G	A	NTRK3		1		BCR-ABL1 ALL	SNV	missense		T269M
Zhang_2015	1120	SJRHB044	chr15	88678619	C	T	NTRK3		1		Rhabdosarcoma	SNV	missense		R306H
Zhang_2015	1120	SJBALL021434	chr4	55138608	G	A	PDGFRA		1		ALL with alterations of ERG	SNV	missense		G429R
Zhang_2015	1120	SJBALL095	chr4	55138597	A	G	PDGFRA		1		BALL	SNV	missense		H425R
Zhang_2015	1120	SJBALL230	chr4	55138608	G	A	PDGFRA		1		ALL with alterations of ERG	SNV	missense		G429R
Zhang_2015	1120	SJCBF152	chr4	55138675	A	C	PDGFRA		1		Core binding factor AML	SNV	missense		K451T
Zhang_2015	1120	SJEWS010367	chr4	55140770	T	C	PDGFRA		1		Ewing's sarcoma	SNV	missense		V544A
Zhang_2015	1120	SJHYPER103	chr4	55138597	A	G	PDGFRA		1		Hyperdiploid ALL	SNV	missense		H425R
Zhang_2015	1120	SJNBL146	chr4	55136813	T	G	PDGFRA		1		Neuroblastoma	SNV	missense		L379V
Zhang_2015	1120	SJOS001110	chr4	55156529	T	G	PDGFRA		1		Osteosarcoma	SNV	missense		V977G
Zhang_2015	1120	SJBALL195	chr5	149501475	T	C	PDGFRB		1		BALL	SNV	missense		Y771C
Zhang_2015	1120	SJBALL231	chr5	149509364	T	C	PDGFRB		1		PH-LIKE	SNV	missense		N512S
Zhang_2015	1120	SJE2A021	chr5	149511596	G	A	PDGFRB		1		B-Lineage ALL E2A-PBX1 Subtype	SNV	missense		R397W
Zhang_2015	1120	SJE2A022	chr5	149501461	C	T	PDGFRB		1		B-Lineage ALL E2A-PBX1 Subtype	SNV	missense		D776N
Zhang_2015	1120	SJEPD037	chr5	149501592	A	C	PDGFRB		1		Ependymoma	SNV	missense		L732W
Zhang_2015	1120	SJERG020305	chr5	149499072	C	T	PDGFRB		1		ALL with alterations of ERG	SNV	missense		R919Q
Zhang_2015	1120	SJHGG067	chr5	149512332	G	A	PDGFRB		1		High Grade Glioma	SNV	missense		R370C
Zhang_2015	1120	SJHGG093	chr5	149512487	A	G	PDGFRB		1		High Grade Glioma	SNV	missense		L318P
Zhang_2015	1120	SJBALL020828	chrX	76938325	C	T	ATRX		1		ALL with alterations of ERG	SNV	missense		R808Q
Zhang_2015	1120	SJE2A013	chrX	76912075	C	T	ATRX		1		B-Lineage ALL E2A-PBX1 Subtype	SNV	missense		E1397K
Zhang_2015	1120	SJE2A031	chrX	76937530	C	G	ATRX		1		B-Lineage ALL E2A-PBX1 Subtype	SNV	missense		S1073T
Zhang_2015	1120	SJHGG002	chrX	76939739	C	A	ATRX		1		High Grade Glioma	SNV	missense		G337C
Zhang_2015	1120	SJHGG002	chrX	76939744	-	GAA	ATRX		1		High Grade Glioma	SNV	proteinIns		C335>FR
Zhang_2015	1120	SJNBL161	chrX	76889151	C	T	ATRX		1		Neuroblastoma	SNV	missense		S1620N
Zhang_2015	1120	SJTALL071	chrX	76938377	C	G	ATRX		1		T-cell ALL	SNV	missense		D791H
Zhang_2015	1120	SJACT068	chr1	147096095	G	A	BCL9		1		Adrenocortical Carcinoma	SNV	missense		V1206I
Zhang_2015	1120	SJBALL021336	chr1	147091043	G	A	BCL9		1		ALL with alterations of ERG	SNV	missense		R361H
Zhang_2015	1120	SJEWS010371	chr1	147096683	C	T	BCL9		1		Ewing's sarcoma	SNV	missense		P1402S
Zhang_2015	1120	SJHYPER052	chr1	147092533	C	G	BCL9		1		Hyperdiploid ALL	SNV	missense		P858A
Zhang_2015	1120	SJINF017	chr1	147086322	C	G	BCL9		1		Infant ALL	SNV	missense		P156R
Zhang_2015	1120	SJRB001130	chr1	147091651	G	C	BCL9		1		Retinoblastoma	SNV	missense		G564R
Zhang_2015	1120	SJRHB027	chr1	147092780	C	A	BCL9		1		Rhabdosarcoma	SNV	missense		P940H
Zhang_2015	1120	SJTALL075	chr1	147091405	G	A	BCL9		1		T-cell ALL	SNV	missense		E482K
Zhang_2015	1120	SJEPD008	chrX	39913256	G	A	BCOR		1		Ependymoma	SNV	missense		P1586L
Zhang_2015	1120	SJHGG066	chrX	39932203	T	C	BCOR		1		High Grade Glioma	SNV	missense		K799R
Zhang_2015	1120	SJHYPER085	chrX	39934420	G	A	BCOR		1		Hyperdiploid ALL	SNV	missense		T60M
Zhang_2015	1120	SJHYPO110	chrX	39933973	G	A	BCOR		1		Hypodiploid ALL	SNV	missense		S209L
Zhang_2015	1120	SJLGG031	chrX	39932819	C	T	BCOR		1		Low Grade Glioma	SNV	missense		V594I
Zhang_2015	1120	SJRHB024	chrX	39911393	G	A	BCOR		1		Rhabdosarcoma	SNV	missense		P1712L
Zhang_2015	1120	SJEWS010371	chr12	4387941	G	A	CCND2		1		Ewing's sarcoma	SNV	missense		V143M
Zhang_2015	1120	SJACT025	chr17	37627187	T	A	CDK12		1		Adrenocortical Carcinoma	SNV	missense		S368T
Zhang_2015	1120	SJCBF150	chr17	37676297	G	A	CDK12		1		Core binding factor AML	SNV	missense		D1018N
Zhang_2015	1120	SJHGG065	chr17	37618496	C	T	CDK12		1		High Grade Glioma	SNV	missense		P58S
Zhang_2015	1120	SJHYPER103	chr17	37687322	C	G	CDK12		1		Hyperdiploid ALL	SNV	missense		P1409R
Zhang_2015	1120	SJHYPER123	chr17	37619175	C	T	CDK12		1		Hyperdiploid ALL	SNV	missense		A284V
Zhang_2015	1120	SJINF010	chr17	37646920	C	T	CDK12		1		Infant ALL	SNV	missense		S681F
Zhang_2015	1120	SJLGG026	chr17	37649073	G	T	CDK12		1		Low Grade Glioma	SNV	missense		K726N
Zhang_2015	1120	SJNBL032	chr17	37646926	C	T	CDK12		1		Neuroblastoma	SNV	missense		P683L
Zhang_2015	1120	SJNBL156	chr17	37627305	C	T	CDK12		1		Neuroblastoma	SNV	missense		A407V
Zhang_2015	1120	SJBALL020589	chr19	42794778	C	T	CIC		1		PH-LIKE	SNV	missense		P620S
Zhang_2015	1120	SJETV096	chr19	42794778	C	T	CIC		1		ETV6-RUNX1 ALL	SNV	missense		P620S
Zhang_2015	1120	SJEWS001318	chr19	42794715	C	T	CIC		1		Ewing's sarcoma	SNV	missense		R599W
Zhang_2015	1120	SJNBL164	chr19	42798119	G	A	CIC		1		Neuroblastoma	SNV	missense		R1358H
Zhang_2015	1120	SJCBF110	chr6	33288752	A	C	DAXX		1		Core binding factor AML	SNV	missense		V279G
Zhang_2015	1120	SJE2A051	chr6	33288744	G	A	DAXX		1		B-Lineage ALL E2A-PBX1 Subtype	SNV	missense		R282C
Zhang_2015	1120	SJETV092	chr6	33288608	T	C	DAXX		1		ETV6-RUNX1 ALL	SNV	missense		D327G
Zhang_2015	1120	SJNBL184	chr6	33287834	ACCCTCCTG	-	DAXX		1		Neuroblastoma	SNV	proteinDel		Q483_G485del
Zhang_2015	1120	SJOS001125	chr6	33286558	C	T	DAXX		1		Osteosarcoma	SNV	missense		D741N
Zhang_2015	1120	SJE2A017	chr19	10939758	C	T	DNM2		1		B-Lineage ALL E2A-PBX1 Subtype	SNV	missense		S702L
Zhang_2015	1120	SJETV096	chr19	10939890	C	T	DNM2		1		ETV6-RUNX1 ALL	SNV	missense		T746M
Zhang_2015	1120	SJHGG033	chr19	10908121	A	G	DNM2		1		High Grade Glioma	SNV	missense		K421R
Zhang_2015	1120	SJNBL041	chr19	10912997	A	G	DNM2		1		Neuroblastoma	SNV	missense		I486V
Zhang_2015	1120	SJNBL154	chr19	10906826	A	T	DNM2		1		Neuroblastoma	SNV	missense		D429V
Zhang_2015	1120	SJAMLM7069	chr22	41573447	CTC	-	EP300		1		Acute megakaryoblastic leukemia	SNV	proteinDel		P1911_Q1912>Q
Zhang_2015	1120	SJBALL020595	chr22	41572427	G	C	EP300		1		ALL with alterations of ERG	SNV	missense		M1652I
Zhang_2015	1120	SJBALL021427	chr22	41513779	C	T	EP300		1		ALL with alterations of ERG	SNV	missense		P228L
Zhang_2015	1120	SJBALL208	chr22	41545919	C	A	EP300		1		BALL	SNV	missense		T845N
Zhang_2015	1120	SJCBF111	chr22	41545790	C	T	EP300		1		Core binding factor AML	SNV	missense		P802L
Zhang_2015	1120	SJCBF124	chr22	41489081	G	A	EP300		1		Core binding factor AML	SNV	missense		A25T
Zhang_2015	1120	SJE2A005	chr22	41489039	C	T	EP300		1		B-Lineage ALL E2A-PBX1 Subtype	SNV	missense		P11S
Zhang_2015	1120	SJE2A027	chr22	41489039	C	T	EP300		1		B-Lineage ALL E2A-PBX1 Subtype	SNV	missense		P11S
Zhang_2015	1120	SJEPD001526	chr22	41574637	C	T	EP300		1		Ependymoma	SNV	missense		R2308C
Zhang_2015	1120	SJEPD024	chr22	41554473	C	T	EP300		1		Ependymoma	SNV	missense		R1187C
Zhang_2015	1120	SJHGG083	chr22	41573381	G	A	EP300		1		High Grade Glioma	SNV	missense		R1889K
Zhang_2015	1120	SJHYPO004	chr22	41545151	C	T	EP300		1		Hypodiploid ALL	SNV	missense		P784L
Zhang_2015	1120	SJNBL018	chr22	41489037	C	G	EP300		1		Neuroblastoma	SNV	missense		P10R
Zhang_2015	1120	SJNBL157	chr22	41573869	C	G	EP300		1		Neuroblastoma	SNV	missense		Q2052E
Zhang_2015	1120	SJOS001126	chr22	41513545	C	T	EP300		1		Osteosarcoma	SNV	missense		S150L
Zhang_2015	1120	SJRHB002	chr22	41564725	G	A	EP300		1		Rhabdosarcoma	SNV	splice		E25_splice
Zhang_2015	1120	SJRHB005	chr22	41527460	C	G	EP300		1		Rhabdosarcoma	SNV	missense		P451A
Zhang_2015	1120	SJNBL151	chr4	54248488	G	A	FIP1L1		1		Neuroblastoma	SNV	missense		G72S
Zhang_2015	1120	SJPHALL021	chr4	54280858	C	T	FIP1L1		1		BCR-ABL1 ALL	SNV	nonsense		R298*
Zhang_2015	1120	SJHYPO041	chr1	78426063	G	A	FUBP1		1		Hypodiploid ALL	SNV	missense		P488S
Zhang_2015	1120	SJNBL176	chr1	78428595	T	C	FUBP1		1		Neuroblastoma	SNV	missense		I402V
Zhang_2015	1120	SJEPD030	chrX	48649679	G	A	GATA1		1		Ependymoma	SNV	missense		A55T
Zhang_2015	1120	SJMB033	chr10	8097700	C	A	GATA3		1		Medulloblastoma	SNV	missense		H28N
Zhang_2015	1120	SJAMLM7010480	chr7	50468282	C	T	IKZF1		1		Acute megakaryoblastic leukemia	SNV	missense		S506L
Zhang_2015	1120	SJBALL011	chr7	50450301	G	C	IKZF1		1		PH-LIKE	SNV	missense		R162P
Zhang_2015	1120	SJBALL020984	chr7	50459465	G	A	IKZF1		1		iAmp21 ALL	SNV	missense		D252N
Zhang_2015	1120	SJNBL192	chr7	50467822	C	T	IKZF1		1		Neuroblastoma	SNV	missense		P353S
Zhang_2015	1120	SJBALL021336	chr1	59248328	C	A	JUN		1		ALL with alterations of ERG	SNV	missense		G139W
Zhang_2015	1120	SJHYPER063	chrX	53225199	G	A	KDM5C		1		Hyperdiploid ALL	SNV	missense		R1007C
Zhang_2015	1120	SJERG020299	chrX	44938552	A	G	KDM6A		1		ALL with alterations of ERG	SNV	missense		K1034E
Zhang_2015	1120	SJHYPO014	chrX	44928833	A	G	KDM6A		1		Hypodiploid ALL	SNV	missense		K645E
Zhang_2015	1120	SJINF014	chrX	44911005	A	C	KDM6A		1		Infant ALL	SNV	missense		N236H
Zhang_2015	1120	SJOS011	chrX	44929031	G	T	KDM6A		1		Osteosarcoma	SNV	missense		G711C
Zhang_2015	1120	SJRHB020	chrX	44922745	A	C	KDM6A		1		Rhabdosarcoma	SNV	missense		N536H
Zhang_2015	1120	SJETV190	chr1	43812237	G	T	MPL		1		ETV6-RUNX1 ALL	SNV	missense		V368L
Zhang_2015	1120	SJNBL178	chr1	43804305	G	C	MPL		1		Neuroblastoma	SNV	missense		R102P
Zhang_2015	1120	SJRHB035	chr1	43804305	G	C	MPL		1		Rhabdosarcoma	SNV	missense		R102P
Zhang_2015	1120	SJBALL247	chr1	120539792	C	A	NOTCH2		1		PH-LIKE	SNV	missense		Q193H
Zhang_2015	1120	SJBALL267	chr1	120539662	G	A	NOTCH2		1		PH-LIKE	SNV	missense		R237W
Zhang_2015	1120	SJCBF016	chr1	120548009	T	G	NOTCH2		1		Core binding factor AML	SNV	missense		T120P
Zhang_2015	1120	SJEPD001526	chr1	120461080	C	T	NOTCH2		1		Ependymoma	SNV	missense		V1960M
Zhang_2015	1120	SJEPD021	chr1	120460347	C	T	NOTCH2		1		Ependymoma	SNV	missense		V1990M
Zhang_2015	1120	SJERG020054	chr1	120459032	G	A	NOTCH2		1		ALL with alterations of ERG	SNV	missense		R2105W
Zhang_2015	1120	SJETV021	chr1	120458116	C	T	NOTCH2		1		ETV6-RUNX1 ALL	SNV	missense		G2410D
Zhang_2015	1120	SJETV074	chr1	120459167	G	A	NOTCH2		1		ETV6-RUNX1 ALL	SNV	missense		R2060C
Zhang_2015	1120	SJEWS010375	chr1	120539655	G	C	NOTCH2		1		Ewing's sarcoma	SNV	missense		T239S
Zhang_2015	1120	SJHGG040	chr1	120459167	G	A	NOTCH2		1		High Grade Glioma	SNV	missense		R2060C
Zhang_2015	1120	SJHGG099	chr1	120483315	C	T	NOTCH2		1		High Grade Glioma	SNV	missense		G1016S
Zhang_2015	1120	SJHYPER150	chr1	120548029	C	T	NOTCH2		1		Hyperdiploid ALL	SNV	missense		R113Q
Zhang_2015	1120	SJHYPO022	chr1	120468294	G	T	NOTCH2		1		Hypodiploid ALL	SNV	missense		P1382H
Zhang_2015	1120	SJINF012	chr1	120459289	C	T	NOTCH2		1		Infant ALL	SNV	missense		R2019Q
Zhang_2015	1120	SJMB032	chr1	120497840	A	T	NOTCH2		1		Medulloblastoma	SNV	missense		I681N
Zhang_2015	1120	SJNBL136	chr1	120548009	T	G	NOTCH2		1		Neuroblastoma	SNV	missense		T120P
Zhang_2015	1120	SJRHB047	chr1	120506308	C	T	NOTCH2		1		Rhabdosarcoma	SNV	missense		A602T
Zhang_2015	1120	SJTALL071	chr1	120529630	A	G	NOTCH2		1		T-cell ALL	SNV	missense		V276A
Zhang_2015	1120	SJACT009	chr11	3744491	C	T	NUP98		1		Adrenocortical Carcinoma	SNV	missense		R681Q
Zhang_2015	1120	SJERG026	chr11	3714490	G	A	NUP98		1		ALL with alterations of ERG	SNV	missense		A1428V
Zhang_2015	1120	SJETV001	chr11	3741947	C	T	NUP98		1		ETV6-RUNX1 ALL	SNV	missense		R752Q
Zhang_2015	1120	SJETV026	chr11	3720413	T	C	NUP98		1		ETV6-RUNX1 ALL	SNV	missense		E1303G
Zhang_2015	1120	SJHGG010326	chr11	3742029	A	G	NUP98		1		High Grade Glioma	SNV	missense		Y725H
Zhang_2015	1120	SJHGG055	chr11	3752721	G	A	NUP98		1		High Grade Glioma	SNV	missense		R544W
Zhang_2015	1120	SJHYPER055	chr11	3714490	G	A	NUP98		1		Hyperdiploid ALL	SNV	missense		A1428V
Zhang_2015	1120	SJHYPO001	chr11	3752687	T	C	NUP98		1		Hypodiploid ALL	SNV	missense		K555R
Zhang_2015	1120	SJNBL016	chr11	3720413	T	C	NUP98		1		Neuroblastoma	SNV	missense		E1303G
Zhang_2015	1120	SJNBL016	chr11	3744541	GCTGTT	-	NUP98		1		Neuroblastoma	SNV	proteinDel		N663_S664del
Zhang_2015	1120	SJRHB050	chr11	3800258	G	A	NUP98		1		Rhabdosarcoma	SNV	missense		S67L
Zhang_2015	1120	SJBALL083	chr5	67591264	G	C	PIK3R1		1		BALL	SNV	missense		G588R
Zhang_2015	1120	SJERG002	chr5	67593276	A	C	PIK3R1		1		ALL with alterations of ERG	SNV	missense		K674N
Zhang_2015	1120	SJETV003	chr5	67569269	C	T	PIK3R1		1		ETV6-RUNX1 ALL	SNV	missense		P129L
Zhang_2015	1120	SJETV079	chr5	67593361	C	T	PIK3R1		1		ETV6-RUNX1 ALL	SNV	missense		L703F
Zhang_2015	1120	SJACT065	chr3	47079235	C	T	SETD2		1		Adrenocortical Carcinoma	SNV	missense		S2424N
Zhang_2015	1120	SJBALL021898	chr3	47125229	T	C	SETD2		1		BALL	SNV	missense		D2014G
Zhang_2015	1120	SJE2A017	chr3	47161675	T	A	SETD2		1		B-Lineage ALL E2A-PBX1 Subtype	SNV	missense		E1484V
Zhang_2015	1120	SJERG024	chr3	47058629	T	G	SETD2		1		ALL with alterations of ERG	SNV	missense		K2550T
Zhang_2015	1120	SJNBL033	chr3	47163148	G	A	SETD2		1		Neuroblastoma	SNV	missense		S993F
Zhang_2015	1120	SJPHALL020045	chr3	47205396	G	A	SETD2		1		BCR-ABL1 ALL	SNV	nonsense		Q7*
Zhang_2015	1120	SJTALL066	chr3	47165734	G	A	SETD2		1		T-cell ALL	SNV	missense		S131F
Zhang_2015	1120	SJNBL151	chr17	30325925	C	G	SUZ12		1		Neuroblastoma	SNV	missense		T708R
Zhang_2015	1120	SJE2A060	chr15	57574691	A	G	TCF12		1		B-Lineage ALL E2A-PBX1 Subtype	SNV	missense		E652G
Zhang_2015	1120	SJEPD006	chr15	57574720	C	G	TCF12		1		Ependymoma	SNV	missense		P662A
Zhang_2015	1120	SJEPD033	chr15	57545473	A	G	TCF12		1		Ependymoma	SNV	missense		E401G
Zhang_2015	1120	SJEWS001303	chr15	57554373	G	C	TCF12		1		Ewing's sarcoma	SNV	missense		D493H
Zhang_2015	1120	SJHGG077	chr15	57524908	A	G	TCF12		1		High Grade Glioma	SNV	splice		S276_E11splice
Zhang_2015	1120	SJHYPER102	chr15	57523386	C	T	TCF12		1		Hyperdiploid ALL	SNV	missense		R206C
Zhang_2015	1120	SJLGG003	chr15	57545500	C	T	TCF12		1		Low Grade Glioma	SNV	missense		A410V
Zhang_2015	1120	SJLGG004	chr15	57554373	G	C	TCF12		1		Low Grade Glioma	SNV	missense		D493H
Zhang_2015	1120	SJMB003	chr15	57545653	G	A	TCF12		1		Medulloblastoma	SNV	missense		R485Q
Zhang_2015	1120	SJACT068	chr3	30713601	C	T	TGFBR2		1		Adrenocortical Carcinoma	SNV	missense		T334M
Zhang_2015	1120	SJEPD001504	chr3	30713510	T	C	TGFBR2		1		Ependymoma	SNV	missense		F304L
Zhang_2015	1120	SJHGG010325	chr3	30713510	T	C	TGFBR2		1		High Grade Glioma	SNV	missense		F304L
Zhang_2015	1120	SJMLL003	chr3	30713619	C	T	TGFBR2		1		Mixed Lineage Leukemia	SNV	missense		T340M
Zhang_2015	1120	SJNBL146	chr3	30713660	G	A	TGFBR2		1		Neuroblastoma	SNV	missense		A354T
Zhang_2015	1120	SJRB003	chr3	30691850	T	C	TGFBR2		1		Retinoblastoma	SNV	missense		S143P
Zhang_2015	1120	SJRHB047	chr3	30713244	G	A	TGFBR2		1		Rhabdosarcoma	SNV	missense		R215H
Zhang_2015	1120	SJPHALL020047	chr1	2494645	C	T	TNFRSF14		1		BCR-ABL1 ALL	SNV	missense		P262L
Zhang_2015	1120	SJBALL020570	chr14	81609966	G	A	TSHR		1		iAmp21 ALL	SNV	missense		A522T
Zhang_2015	1120	SJERG020307	chr14	81422124	G	A	TSHR		1		ALL with alterations of ERG	SNV	missense		E34K
Zhang_2015	1120	SJETV194	chr14	81575012	-	TCCA	TSHR		1		ETV6-RUNX1 ALL	SNV	frameshift		S271fs
Zhang_2015	1120	SJETV195	chr14	81575012	-	TCCA	TSHR		1		ETV6-RUNX1 ALL	SNV	frameshift		S271fs
Zhang_2015	1120	SJHGG010326	chr14	81609994	G	A	TSHR		1		High Grade Glioma	SNV	missense		R531Q
Zhang_2015	1120	SJHGG037	chr14	81610137	G	A	TSHR		1		High Grade Glioma	SNV	missense		A579T
Zhang_2015	1120	SJHGG076	chr14	81563035	A	G	TSHR		1		High Grade Glioma	SNV	missense		T200A
Zhang_2015	1120	SJHYPER084	chr14	81528523	C	T	TSHR		1		Hyperdiploid ALL	SNV	missense		P68S
Zhang_2015	1120	SJHYPO046	chr14	81610348	T	C	TSHR		1		Hypodiploid ALL	SNV	missense		L649P
Zhang_2015	1120	SJHYPO047	chr14	81528523	C	T	TSHR		1		Hypodiploid ALL	SNV	missense		P68S
Zhang_2015	1120	SJRHB026	chr14	81609861	G	A	TSHR		1		Rhabdosarcoma	SNV	missense		D487N
Zhang_2015	1120	SJBALL201	chr17	5044792	A	-	USP6		1		BALL	SNV	frameshift		K524fs
Zhang_2015	1120	SJCBF112	chr17	5066291	C	T	USP6		1		Core binding factor AML	SNV	nonsense		Q1010*
Zhang_2015	1120	SJE2A027	chr17	5045297	G	A	USP6		1		B-Lineage ALL E2A-PBX1 Subtype	SNV	splice		V525_E16splice
Zhang_2015	1120	SJE2A035	chr17	5042649	C	A	USP6		1		B-Lineage ALL E2A-PBX1 Subtype	SNV	missense		P393Q
Zhang_2015	1120	SJERG020053	chr17	5074095	G	A	USP6		1		ALL with alterations of ERG	SNV	missense		G1280D
Zhang_2015	1120	SJETV022	chr17	5048100	A	T	USP6		1		ETV6-RUNX1 ALL	SNV	missense		K645M
Zhang_2015	1120	SJEWS001302	chr17	5041454	C	T	USP6		1		Ewing's sarcoma	SNV	missense		R322C
Zhang_2015	1120	SJEWS010374	chr17	5049348	G	A	USP6		1		Ewing's sarcoma	SNV	missense		R733Q
Zhang_2015	1120	SJEWS010418	chr17	5071362	-	T	USP6		1		Ewing's sarcoma	SNV	frameshift		K1058fs
Zhang_2015	1120	SJHGG099	chr17	5051908	TACC	-	USP6		1		High Grade Glioma	SNV	frameshift		L830_P831fs
Zhang_2015	1120	SJLGG019	chr17	5058756	C	T	USP6		1		Low Grade Glioma	SNV	missense		R895C
Zhang_2015	1120	SJNBL015	chr17	5042963	G	A	USP6		1		Neuroblastoma	SNV	missense		G498R
Zhang_2015	1120	SJNBL041	chr17	5072170	C	T	USP6		1		Neuroblastoma	SNV	nonsense		R1113*
Zhang_2015	1120	SJOS001123	chr17	5071261	G	A	USP6		1		Osteosarcoma	SNV	missense		R1024Q
Zhang_2015	1120	SJCBF094	chrX	15821893	G	A	ZRSR2		1		Core binding factor AML	SNV	missense		A96T
Zhang_2015	1120	SJHYPER114	chrX	15818015	G	A	ZRSR2		1		Hyperdiploid ALL	SNV	missense		E48K
Zhang_2015	1120	SJBALL021427	chr2	223791829	A	G	ACSL3		1		ALL with alterations of ERG	SNV	missense		M463V
Zhang_2015	1120	SJMB012	chr2	223787512	G	A	ACSL3		1		Medulloblastoma	SNV	missense		R348H
Zhang_2015	1120	SJAMLM7010475	chr7	91726036	A	G	AKAP9		1		Acute megakaryoblastic leukemia	SNV	missense		R3247G
Zhang_2015	1120	SJAMLM7010475	chr7	91731945	G	A	AKAP9		1		Acute megakaryoblastic leukemia	SNV	missense		R3704Q
Zhang_2015	1120	SJAMLM7065	chr7	91630873	A	G	AKAP9		1		Acute megakaryoblastic leukemia	SNV	missense		R548G
Zhang_2015	1120	SJAMLM7066	chr7	91641872	C	T	AKAP9		1		Acute megakaryoblastic leukemia	SNV	missense		L1150F
Zhang_2015	1120	SJBALL014	chr7	91732119	G	C	AKAP9		1		BALL	SNV	missense		R3762T
Zhang_2015	1120	SJCBF027	chr7	91672081	G	A	AKAP9		1		Core binding factor AML	SNV	missense		E1720K
Zhang_2015	1120	SJCBF121	chr7	91726577	G	T	AKAP9		1		Core binding factor AML	SNV	missense		R3427L
Zhang_2015	1120	SJEPD001517	chr7	91690677	G	A	AKAP9		1		Ependymoma	SNV	missense		R1902H
Zhang_2015	1120	SJEPD007	chr7	91708531	G	A	AKAP9		1		Ependymoma	SNV	missense		E2354K
Zhang_2015	1120	SJERG016	chr7	91641854	T	C	AKAP9		1		ALL with alterations of ERG	SNV	missense		C1144R
Zhang_2015	1120	SJETV043	chr7	91630739	A	G	AKAP9		1		ETV6-RUNX1 ALL	SNV	missense		Q503R
Zhang_2015	1120	SJHYPER005	chr7	91722498	A	G	AKAP9		1		Hyperdiploid ALL	SNV	missense		E3141G
Zhang_2015	1120	SJHYPO006	chr7	91631840	G	A	AKAP9		1		Hypodiploid ALL	SNV	missense		C870Y
Zhang_2015	1120	SJHYPO013	chr7	91631840	G	A	AKAP9		1		Hypodiploid ALL	SNV	missense		C870Y
Zhang_2015	1120	SJHYPO026	chr7	91695792	C	A	AKAP9		1		Hypodiploid ALL	SNV	missense		Q2088K
Zhang_2015	1120	SJMB004	chr7	91674443	A	G	AKAP9		1		Medulloblastoma	SNV	missense		K1762E
Zhang_2015	1120	SJMEL001004	chr7	91736684	C	T	AKAP9		1		Melanoma	SNV	missense		R3824C
Zhang_2015	1120	SJNBL154	chr7	91682120	G	A	AKAP9		1		Neuroblastoma	SNV	missense		E1817K
Zhang_2015	1120	SJOS001114	chr7	91708982	A	T	AKAP9		1		Osteosarcoma	SNV	missense		D2504V
Zhang_2015	1120	SJRB024	chr7	91708982	A	T	AKAP9		1		Retinoblastoma	SNV	missense		D2504V
Zhang_2015	1120	SJTALL011	chr7	91674405	T	C	AKAP9		1		T-cell ALL	SNV	missense		I1749T
Zhang_2015	1120	SJBALL263	chr2	60689322	C	T	BCL11A		1		PH-LIKE	SNV	missense		R242K
Zhang_2015	1120	SJBALL267	chr2	60688013	G	T	BCL11A		1		PH-LIKE	SNV	missense		D678E
Zhang_2015	1120	SJETV190	chr2	60688562	T	G	BCL11A		1		ETV6-RUNX1 ALL	SNV	missense		E495D
Zhang_2015	1120	SJHYPER108	chr18	60985524	C	T	BCL2		1		Hyperdiploid ALL	SNV	missense		A126T
Zhang_2015	1120	SJACT026	chr3	187446312	C	T	BCL6		1		Adrenocortical Carcinoma	SNV	missense		R459H
Zhang_2015	1120	SJETV045	chr3	187444578	C	T	BCL6		1		ETV6-RUNX1 ALL	SNV	missense		R550H
Zhang_2015	1120	SJHYPER100	chr3	187447355	C	T	BCL6		1		Hyperdiploid ALL	SNV	missense		G280S
Zhang_2015	1120	SJMB029	chr3	187447288	T	C	BCL6		1		Medulloblastoma	SNV	missense		E302G
Zhang_2015	1120	SJNBL145	chr3	187447228	G	T	BCL6		1		Neuroblastoma	SNV	missense		P322H
Zhang_2015	1120	SJOS018	chr3	187451363	C	T	BCL6		1		Osteosarcoma	SNV	missense		R40H
Zhang_2015	1120	SJACT004	chr7	2974266	G	A	CARD11		1		Adrenocortical Carcinoma	SNV	nonsense		Q447*
Zhang_2015	1120	SJE2A068	chr7	2953019	C	T	CARD11		1		B-Lineage ALL E2A-PBX1 Subtype	SNV	missense		R974H
Zhang_2015	1120	SJLGG029	chr7	2953019	C	T	CARD11		1		Low Grade Glioma	SNV	missense		R974H
Zhang_2015	1120	SJNBL162	chr7	2979435	C	T	CARD11		1		Neuroblastoma	SNV	missense		R271Q
Zhang_2015	1120	SJBALL255	chr5	149782705	G	A	CD74		1		PH-LIKE	SNV	missense		R266C
Zhang_2015	1120	SJTALL011	chr5	149782705	G	A	CD74		1		T-cell ALL	SNV	missense		R266C
Zhang_2015	1120	SJACT063	chr17	62007182	G	A	CD79B		1		Adrenocortical Carcinoma	SNV	missense		T166M
Zhang_2015	1120	SJEPD009	chr17	62006630	C	G	CD79B		1		Ependymoma	SNV	missense		G216R
Zhang_2015	1120	SJETV025	chr17	62007182	G	A	CD79B		1		ETV6-RUNX1 ALL	SNV	missense		T166M
Zhang_2015	1120	SJMB038	chr3	41275687	C	T	CTNNB1		1		Medulloblastoma	SNV	missense		R528C
Zhang_2015	1120	SJACT063	chr2	25462068	A	G	DNMT3A		1		Adrenocortical Carcinoma	SNV	missense		I780T
Zhang_2015	1120	SJLGG004	chr2	25505421	C	T	DNMT3A		1		Low Grade Glioma	SNV	missense		G113R
Zhang_2015	1120	SJHGG082	chr22	29695612	C	G	EWSR1		1		High Grade Glioma	SNV	missense		P568A
Zhang_2015	1120	SJACT022	chr7	148515137	G	A	EZH2		1		Adrenocortical Carcinoma	SNV	missense		R358C
Zhang_2015	1120	SJETV083	chr7	148511214	G	A	EZH2		1		ETV6-RUNX1 ALL	SNV	missense		P563L
Zhang_2015	1120	SJE2A032	chr6	159192357	C	T	EZR		1		B-Lineage ALL E2A-PBX1 Subtype	SNV	missense		R293H
Zhang_2015	1120	SJETV069	chr6	159206592	C	G	EZR		1		ETV6-RUNX1 ALL	SNV	missense		K72N
Zhang_2015	1120	SJMLL013	chr6	159204628	T	C	EZR		1		Mixed Lineage Leukemia	SNV	missense		I208V
Zhang_2015	1120	SJNBL158	chr6	159188113	G	A	EZR		1		Neuroblastoma	SNV	splice		L532_E13splice
Zhang_2015	1120	SJE2A064	chr3	138664540	C	T	FOXL2		1		B-Lineage ALL E2A-PBX1 Subtype	SNV	missense		G342D
Zhang_2015	1120	SJINF008	chr19	3113335	C	A	GNA11		1		Infant ALL	SNV	missense		A110E
Zhang_2015	1120	SJBALL021324	chr20	57429004	T	-	GNAS		1		ALL with alterations of ERG	SNV	frameshift		L166fs
Zhang_2015	1120	SJCBF145	chr20	57415352	TCCT	-	GNAS		1		Core binding factor AML	SNV	frameshift		F64_L65fs
Zhang_2015	1120	SJNBL142	chr20	57429553	CGACTCCGGGACAGCACCAGCCGATCC	-	GNAS		1		Neuroblastoma	SNV	proteinDel		P349_L358>L
Zhang_2015	1120	SJOS001125	chr20	57415481	T	G	GNAS		1		Osteosarcoma	SNV	missense		F107C
Zhang_2015	1120	SJRB016	chr20	57429221	T	-	GNAS		1		Retinoblastoma	SNV	frameshift		P238fs
Zhang_2015	1120	SJAMLM7005	chr15	90631596	C	T	IDH2		1		Acute megakaryoblastic leukemia	SNV	missense		D225N
Zhang_2015	1120	SJEWS010416	chr15	90634813	C	T	IDH2		1		Ewing's sarcoma	SNV	missense		R60H
Zhang_2015	1120	SJNBL157	chr15	90631866	C	T	IDH2		1		Neuroblastoma	SNV	missense		G163S
Zhang_2015	1120	SJBALL021516	chr5	35874551	G	A	IL7R		1		ALL with alterations of ERG	SNV	splice		G236_E6splice
Zhang_2015	1120	SJCBF138	chr5	35876565	T	C	IL7R		1		Core binding factor AML	SNV	missense		S453P
Zhang_2015	1120	SJERG030	chr5	35867528	G	C	IL7R		1		ALL with alterations of ERG	SNV	missense		K114N
Zhang_2015	1120	SJHGG053	chr5	35876524	C	G	IL7R		1		High Grade Glioma	SNV	missense		T439S
Zhang_2015	1120	SJOS016	chr5	35876382	G	A	IL7R		1		Osteosarcoma	SNV	missense		E392K
Zhang_2015	1120	SJEWS001304	chrX	70357234	G	A	MED12		1		Ewing's sarcoma	SNV	splice		Q1916_E39splice
Zhang_2015	1120	SJCBF003	chr9	20363474	C	T	MLLT3		1		Core binding factor AML	SNV	missense		R444K
Zhang_2015	1120	SJAMLM7011	chr8	128752745	C	A	MYC		1		Acute megakaryoblastic leukemia	SNV	missense		H302Q
Zhang_2015	1120	SJBALL021081	chr8	128750684	C	A	MYC		1		ALL with alterations of ERG	SNV	missense		P74Q
Zhang_2015	1120	SJHYPER121	chr8	128750820	G	T	MYC		1		Hyperdiploid ALL	SNV	missense		E119D
Zhang_2015	1120	SJNBL045	chr8	128752745	C	A	MYC		1		Neuroblastoma	SNV	missense		H302Q
Zhang_2015	1120	SJHGG025	chr2	16085723	C	T	MYCN		1		High Grade Glioma	SNV	missense		T300I
Zhang_2015	1120	SJEPD001502	chr3	38182725	G	A	MYD88		1		Ependymoma	SNV	missense		C293Y
Zhang_2015	1120	SJHYPO125	chr3	38182019	A	C	MYD88		1		Hypodiploid ALL	SNV	missense		T215P
Zhang_2015	1120	SJOS009	chr3	38182000	C	G	MYD88		1		Osteosarcoma	SNV	missense		D208E
Zhang_2015	1120	SJLGG007	chr3	178943786	G	A	PIK3CA		1		Low Grade Glioma	SNV	missense		R818H
Zhang_2015	1120	SJNBL177	chr6	37141799	-	CAA	PIM1		1		Neuroblastoma	SNV	proteinIns		QinsD292
Zhang_2015	1120	SJPHALL020034	chr19	52719860	A	G	PPP2R1A		1		BCR-ABL1 ALL	SNV	missense		K358E
Zhang_2015	1120	SJMB027	chr2	198283669	T	C	SF3B1		1		Medulloblastoma	SNV	missense		Y141C
Zhang_2015	1120	SJEWS010416	chr10	70405053	C	A	TET1		1		Ewing's sarcoma	SNV	missense		P856Q
Zhang_2015	1120	SJHGG010324	chr10	70426931	G	A	TET1		1		High Grade Glioma	SNV	missense		D1531N
Zhang_2015	1120	SJMB028	chr10	70451021	C	T	TET1		1		Medulloblastoma	SNV	missense		S1954F
Zhang_2015	1120	SJNBL010	chr10	70426931	G	A	TET1		1		Neuroblastoma	SNV	missense		D1531N
Zhang_2015	1120	SJNBL024	chr10	70405962	G	A	TET1		1		Neuroblastoma	SNV	missense		R1159Q
Zhang_2015	1120	SJEPD003	chr4	1902689	A	G	WHSC1		1		Ependymoma	SNV	missense		Q103R
Zhang_2015	1120	SJHYPER016	chr4	1957055	G	A	WHSC1		1		Hyperdiploid ALL	SNV	missense		V836M
Zhang_2015	1120	SJPHALL005	chr4	1902658	G	A	WHSC1		1		BCR-ABL1 ALL	SNV	missense		A93T
Zhang_2015	1120	SJRHB030	chr4	1980496	C	T	WHSC1		1		Rhabdosarcoma	SNV	missense		R1320W
Zhang_2015	1120	SJBALL020516	chr12	6782442	T	C	ZNF384		1		iAmp21 ALL	SNV	missense		Y284C
Zhang_2015	1120	SJRHB026	chr12	6787407	G	A	ZNF384		1		Rhabdosarcoma	SNV	missense		P191L
Zhang_2015	1120	SJEPD001518	chr5	131329779	C	T	ACSL6		1		Ependymoma	SNV	missense		R72Q
Zhang_2015	1120	SJERG011	chr5	131310462	G	A	ACSL6		1		ALL with alterations of ERG	SNV	nonsense		R353*
Zhang_2015	1120	SJERG023	chr5	131296281	C	A	ACSL6		1		ALL with alterations of ERG	SNV	nonsense		E631*
Zhang_2015	1120	SJHGG034	chr5	131323895	T	C	ACSL6		1		High Grade Glioma	SNV	missense		D226G
Zhang_2015	1120	SJHGG081	chr5	131308476	G	A	ACSL6		1		High Grade Glioma	SNV	missense		R427W
Zhang_2015	1120	SJHYPER063	chr5	131305850	G	A	ACSL6		1		Hyperdiploid ALL	SNV	missense		T493I
Zhang_2015	1120	SJHYPO039	chr5	131303680	C	T	ACSL6		1		Hypodiploid ALL	SNV	missense		V517I
Zhang_2015	1120	SJAMLM7065	chr4	88035772	C	T	AFF1		1		Acute megakaryoblastic leukemia	SNV	missense		P589L
Zhang_2015	1120	SJBALL021427	chr4	88036015	A	T	AFF1		1		ALL with alterations of ERG	SNV	missense		K670M
Zhang_2015	1120	SJBALL239	chr4	87968304	C	T	AFF1		1		iAmp21 ALL	SNV	missense		S199F
Zhang_2015	1120	SJCBF112	chr4	88036015	A	T	AFF1		1		Core binding factor AML	SNV	missense		K670M
Zhang_2015	1120	SJEPD001510	chr4	88047336	C	A	AFF1		1		Ependymoma	SNV	missense		P880T
Zhang_2015	1120	SJERG020305	chr4	88029444	C	T	AFF1		1		ALL with alterations of ERG	SNV	missense		P497S
Zhang_2015	1120	SJHGG049	chr4	87967400	T	C	AFF1		1		High Grade Glioma	SNV	missense		F34L
Zhang_2015	1120	SJHGG071	chr4	88036111	C	T	AFF1		1		High Grade Glioma	SNV	missense		A702V
Zhang_2015	1120	SJHYPER048	chr4	88029463	C	T	AFF1		1		Hyperdiploid ALL	SNV	missense		P503L
Zhang_2015	1120	SJHYPO019	chr4	87968729	C	T	AFF1		1		Hypodiploid ALL	SNV	missense		P341S
Zhang_2015	1120	SJMLL012	chr4	87968420	A	G	AFF1		1		Mixed Lineage Leukemia	SNV	missense		K238E
Zhang_2015	1120	SJNBL019	chr4	88047319	C	T	AFF1		1		Neuroblastoma	SNV	missense		S874F
Zhang_2015	1120	SJCBF150	chr2	100625347	C	T	AFF3		1		Core binding factor AML	SNV	missense		R34K
Zhang_2015	1120	SJRB039	chr2	100623293	C	T	AFF3		1		Retinoblastoma	SNV	missense		S225N
Zhang_2015	1120	SJAMLM7065	chr5	132232556	G	T	AFF4		1		Acute megakaryoblastic leukemia	SNV	missense		P589H
Zhang_2015	1120	SJAMLM7065	chr5	132272841	C	T	AFF4		1		Acute megakaryoblastic leukemia	SNV	missense		R14Q
Zhang_2015	1120	SJEWS010371	chr5	132272803	C	T	AFF4		1		Ewing's sarcoma	SNV	missense		A27T
Zhang_2015	1120	SJINF034	chr5	132270522	T	C	AFF4		1		Infant ALL	SNV	missense		K79E
Zhang_2015	1120	SJLGG025	chr5	132270236	G	C	AFF4		1		Low Grade Glioma	SNV	missense		S174C
Zhang_2015	1120	SJMB028	chr5	132232320	A	G	AFF4		1		Medulloblastoma	SNV	missense		Y668H
Zhang_2015	1120	SJETV043	chr19	40762857	G	C	AKT2		1		ETV6-RUNX1 ALL	SNV	missense		P51A
Zhang_2015	1120	SJHGG002	chr19	40741187	C	T	AKT2		1		High Grade Glioma	SNV	missense		D416N
Zhang_2015	1120	SJMB040	chr19	40739802	AGG	-	AKT2		1		Medulloblastoma	SNV	proteinDel		S474_Y475>Y
Zhang_2015	1120	SJAMLM7006	chr12	112229928	G	A	ALDH2		1		Acute megakaryoblastic leukemia	SNV	missense		G287R
Zhang_2015	1120	SJBALL021897	chr12	112227697	A	T	ALDH2		1		BALL	SNV	missense		T171S
Zhang_2015	1120	SJEPD001518	chr12	112227739	G	T	ALDH2		1		Ependymoma	SNV	splice		P184_E5splice
Zhang_2015	1120	SJHYPER125	chr12	112221101	C	T	ALDH2		1		Hyperdiploid ALL	SNV	missense		A120V
Zhang_2015	1120	SJHYPO026	chr12	112220981	T	C	ALDH2		1		Hypodiploid ALL	SNV	missense		V80A
Zhang_2015	1120	SJMEL001004	chr12	112221070	G	C	ALDH2		1		Melanoma	SNV	missense		D110H
Zhang_2015	1120	SJPHALL026	chr12	112229871	C	T	ALDH2		1		BCR-ABL1 ALL	SNV	missense		R268C
Zhang_2015	1120	SJRB032	chr12	112227679	G	A	ALDH2		1		Retinoblastoma	SNV	missense		G165R
Zhang_2015	1120	SJINF006	chr5	142273840	A	G	ARHGAP26		1		Infant ALL	SNV	missense		Y175C
Zhang_2015	1120	SJLGG020	chr5	142586819	C	T	ARHGAP26		1		Low Grade Glioma	SNV	missense		A682V
Zhang_2015	1120	SJLGG026	chr5	142292804	G	A	ARHGAP26		1		Low Grade Glioma	SNV	missense		R325Q
Zhang_2015	1120	SJNBL025	chr5	142526809	C	G	ARHGAP26		1		Neuroblastoma	SNV	missense		N617K
Zhang_2015	1120	SJAMLM7010473	chr10	63759886	G	A	ARID5B		1		Acute megakaryoblastic leukemia	SNV	missense		S180N
Zhang_2015	1120	SJERG020051	chr10	63851621	A	C	ARID5B		1		ALL with alterations of ERG	SNV	missense		Y800S
Zhang_2015	1120	SJNBL177	chr10	63851150	A	G	ARID5B		1		Neuroblastoma	SNV	missense		K643R
Zhang_2015	1120	SJOS001118	chr10	63851237	T	A	ARID5B		1		Osteosarcoma	SNV	missense		L672H
Zhang_2015	1120	SJPHALL004	chr10	63852350	A	G	ARID5B		1		BCR-ABL1 ALL	SNV	missense		K1043R
Zhang_2015	1120	SJEPD001502	chr1	150818758	C	T	ARNT		1		Ependymoma	SNV	missense		D70N
Zhang_2015	1120	SJHGG002	chr1	150804339	C	T	ARNT		1		High Grade Glioma	SNV	missense		V304M
Zhang_2015	1120	SJNBL014	chr1	150804339	C	T	ARNT		1		Neuroblastoma	SNV	missense		V304M
Zhang_2015	1120	SJHGG037	chr17	79953938	T	G	ASPSCR1		1		High Grade Glioma	SNV	missense		I168S
Zhang_2015	1120	SJLGG030	chr17	79966930	CGTGGACCGGGAGCC	-	ASPSCR1		1		Low Grade Glioma	SNV	proteinDel		P317_P322>P
Zhang_2015	1120	SJPHALL020044	chr17	79975192	G	C	ASPSCR1		1		BCR-ABL1 ALL	SNV	missense		K552N
Zhang_2015	1120	SJCBF003	chr2	216197195	C	T	ATIC		1		Core binding factor AML	SNV	missense		P260L
Zhang_2015	1120	SJCBF029	chr2	216198120	A	G	ATIC		1		Core binding factor AML	SNV	missense		M288V
Zhang_2015	1120	SJERG007	chr2	216211585	C	T	ATIC		1		ALL with alterations of ERG	SNV	missense		S475L
Zhang_2015	1120	SJERG025	chr2	216191558	C	T	ATIC		1		ALL with alterations of ERG	SNV	missense		T182M
Zhang_2015	1120	SJETV045	chr2	216211627	A	G	ATIC		1		ETV6-RUNX1 ALL	SNV	missense		N489S
Zhang_2015	1120	SJHGG048	chr2	216182931	A	T	ATIC		1		High Grade Glioma	SNV	missense		K66N
Zhang_2015	1120	SJHGG052	chr2	216191558	C	T	ATIC		1		High Grade Glioma	SNV	missense		T182M
Zhang_2015	1120	SJHYPER004	chr2	216211627	A	G	ATIC		1		Hyperdiploid ALL	SNV	missense		N489S
Zhang_2015	1120	SJHYPER111	chr2	216191660	C	A	ATIC		1		Hyperdiploid ALL	SNV	missense		P216H
Zhang_2015	1120	SJMB017	chr2	216190759	AGT	-	ATIC		1		Medulloblastoma	SNV	proteinDel		T143_V144>T
Zhang_2015	1120	SJMEL001001	chr2	216213947	G	A	ATIC		1		Melanoma	SNV	missense		R545Q
Zhang_2015	1120	SJOS001125	chr2	216197189	G	T	ATIC		1		Osteosarcoma	SNV	missense		G258V
Zhang_2015	1120	SJOS002	chr2	216177333	-	CA	ATIC		1		Osteosarcoma	SNV	frameshift		A44fs
Zhang_2015	1120	SJPHALL020034	chr2	216211571	T	A	ATIC		1		BCR-ABL1 ALL	SNV	missense		H470Q
Zhang_2015	1120	SJEWS010364	chr14	99642133	C	T	BCL11B		1		Ewing's sarcoma	SNV	missense		R347Q
Zhang_2015	1120	SJACT006	chr11	102196295	A	G	BIRC3		1		Adrenocortical Carcinoma	SNV	missense		R318G
Zhang_2015	1120	SJEWS010362	chr11	102195271	T	C	BIRC3		1		Ewing's sarcoma	SNV	missense		S11P
Zhang_2015	1120	SJHGG011	chr11	102201799	C	T	BIRC3		1		High Grade Glioma	SNV	missense		A384V
Zhang_2015	1120	SJEPD039	chr14	54417475	C	G	BMP4		1		Ependymoma	SNV	missense		G168R
Zhang_2015	1120	SJHGG067	chr14	54417492	C	T	BMP4		1		High Grade Glioma	SNV	missense		R162Q
Zhang_2015	1120	SJHYPER006	chr14	54418817	C	G	BMP4		1		Hyperdiploid ALL	SNV	missense		A42P
Zhang_2015	1120	SJMB003	chr14	54417226	G	A	BMP4		1		Medulloblastoma	SNV	missense		H251Y
Zhang_2015	1120	SJPHALL020049	chr9	136898752	C	T	BRD3		1		BCR-ABL1 ALL	SNV	missense		S714N
Zhang_2015	1120	SJCBF011	chr19	15367914	G	A	BRD4		1		Core binding factor AML	SNV	missense		P471L
Zhang_2015	1120	SJCBF140	chr19	15383819	G	C	BRD4		1		Core binding factor AML	SNV	missense		A31G
Zhang_2015	1120	SJEPD001504	chr19	15375316	C	T	BRD4		1		Ependymoma	SNV	missense		A371T
Zhang_2015	1120	SJHYPER043	chr19	15376275	G	T	BRD4		1		Hyperdiploid ALL	SNV	missense		L247M
Zhang_2015	1120	SJRB031	chr19	15353808	TGGGGGCGGATGGGGGGGCTGCTGGCC	-	BRD4		1		Retinoblastoma	SNV	proteinDel		G1016_P1024del
Zhang_2015	1120	SJRB051	chr19	15376259	G	C	BRD4		1		Retinoblastoma	SNV	missense		P252R
Zhang_2015	1120	SJACT015	chr2	24261059	C	T	C2orf44		1		Adrenocortical Carcinoma	SNV	missense		E436K
Zhang_2015	1120	SJCBF120	chr2	24261889	A	G	C2orf44		1		Core binding factor AML	SNV	missense		I159T
Zhang_2015	1120	SJETV010	chr2	24262150	T	A	C2orf44		1		ETV6-RUNX1 ALL	SNV	missense		D72V
Zhang_2015	1120	SJEWS001305	chr2	24253999	T	C	C2orf44		1		Ewing's sarcoma	SNV	missense		E657G
Zhang_2015	1120	SJHGG033	chr2	24261393	-	CTT	C2orf44		1		High Grade Glioma	SNV	proteinIns		F324>LS
Zhang_2015	1120	SJBALL021405	chr17	76993192	A	C	CANT1		1		ALL with alterations of ERG	SNV	missense		I171M
Zhang_2015	1120	SJBALL021895	chr17	76993395	G	A	CANT1		1		BALL	SNV	missense		R104W
Zhang_2015	1120	SJCBF099	chr17	76989681	G	A	CANT1		1		Core binding factor AML	SNV	missense		P386L
Zhang_2015	1120	SJNBL184	chr17	76993154	G	A	CANT1		1		Neuroblastoma	SNV	missense		T184M
Zhang_2015	1120	SJACT063	chr11	3037039	G	A	CARS		1		Adrenocortical Carcinoma	SNV	missense		P570L
Zhang_2015	1120	SJERG020052	chr11	3039670	C	G	CARS		1		ALL with alterations of ERG	SNV	missense		E450Q
Zhang_2015	1120	SJERG020304	chr11	3059372	G	A	CARS		1		ALL with alterations of ERG	SNV	missense		R154W
Zhang_2015	1120	SJETV041	chr11	3041525	C	A	CARS		1		ETV6-RUNX1 ALL	SNV	missense		K314N
Zhang_2015	1120	SJHYPO110	chr11	3039118	A	G	CARS		1		Hypodiploid ALL	SNV	missense		W483R
Zhang_2015	1120	SJMB023	chr11	3037042	A	T	CARS		1		Medulloblastoma	SNV	missense		F652Y
Zhang_2015	1120	SJNBL177	chr11	3039670	C	G	CARS		1		Neuroblastoma	SNV	missense		E450Q
Zhang_2015	1120	SJOS001109	chr11	3059375	C	T	CARS		1		Osteosarcoma	SNV	missense		E153K
Zhang_2015	1120	SJOS001118	chr11	3041525	C	A	CARS		1		Osteosarcoma	SNV	missense		K314N
Zhang_2015	1120	SJRHB013	chr11	3041476	G	C	CARS		1		Rhabdosarcoma	SNV	missense		P414A
Zhang_2015	1120	SJBALL263	chr15	40937903	A	G	CASC5		1		PH-LIKE	SNV	missense		K1980R
Zhang_2015	1120	SJCBF116	chr15	40916460	G	A	CASC5		1		Core binding factor AML	SNV	missense		C1333Y
Zhang_2015	1120	SJEPD001515	chr15	40916802	C	T	CASC5		1		Ependymoma	SNV	missense		T1447I
Zhang_2015	1120	SJEPD001517	chr15	40921513	C	G	CASC5		1		Ependymoma	SNV	missense		L1876V
Zhang_2015	1120	SJEPD001525	chr15	40937953	C	G	CASC5		1		Ependymoma	SNV	missense		L1997V
Zhang_2015	1120	SJERG020309	chr15	40920392	C	T	CASC5		1		ALL with alterations of ERG	SNV	missense		S1834F
Zhang_2015	1120	SJHGG099	chr15	40914216	A	G	CASC5		1		High Grade Glioma	SNV	missense		Q585R
Zhang_2015	1120	SJLGG035	chr15	40917418	C	G	CASC5		1		Low Grade Glioma	SNV	missense		I1652M
Zhang_2015	1120	SJMLL003	chr15	40937966	C	T	CASC5		1		Mixed Lineage Leukemia	SNV	missense		A2001V
Zhang_2015	1120	SJNBL166	chr15	40939221	A	C	CASC5		1		Neuroblastoma	SNV	missense		M2015L
Zhang_2015	1120	SJNBL182	chr15	40911207	G	A	CASC5		1		Neuroblastoma	SNV	missense		E125K
Zhang_2015	1120	SJOS001127	chr15	40913355	C	A	CASC5		1		Osteosarcoma	SNV	missense		S298Y
Zhang_2015	1120	SJE2A005	chr3	105400604	T	C	CBLB		1		B-Lineage ALL E2A-PBX1 Subtype	SNV	missense		K754E
Zhang_2015	1120	SJETV004	chr3	105459449	C	T	CBLB		1		ETV6-RUNX1 ALL	SNV	missense		R291Q
Zhang_2015	1120	SJEWS010367	chr3	105412384	G	A	CBLB		1		Ewing's sarcoma	SNV	missense		R670W
Zhang_2015	1120	SJHGG010324	chr3	105495349	T	C	CBLB		1		High Grade Glioma	SNV	missense		M153V
Zhang_2015	1120	SJHYPO042	chr3	105400344	C	T	CBLB		1		Hypodiploid ALL	SNV	missense		D803N
Zhang_2015	1120	SJINF014	chr3	105464791	C	T	CBLB		1		Infant ALL	SNV	missense		R272Q
Zhang_2015	1120	SJNBL142	chr3	105456089	C	A	CBLB		1		Neuroblastoma	SNV	missense		D333Y
Zhang_2015	1120	SJRHB003	chr3	105400604	T	C	CBLB		1		Rhabdosarcoma	SNV	missense		K754E
Zhang_2015	1120	SJTALL066	chr3	105586395	G	C	CBLB		1		T-cell ALL	SNV	missense		N9K
Zhang_2015	1120	SJBALL231	chr19	45296788	G	A	CBLC		1		PH-LIKE	SNV	missense		V399M
Zhang_2015	1120	SJCBF090	chr19	45281198	G	A	CBLC		1		Core binding factor AML	SNV	missense		A4T
Zhang_2015	1120	SJEPD008	chr19	45296789	TG	-	CBLC		1		Ependymoma	SNV	frameshift		V399fs
Zhang_2015	1120	SJEPD011	chr19	45295656	A	G	CBLC		1		Ependymoma	SNV	missense		Y341C
Zhang_2015	1120	SJEWS010367	chr19	45281492	G	T	CBLC		1		Ewing's sarcoma	SNV	missense		G102C
Zhang_2015	1120	SJHYPO047	chr19	45284299	G	T	CBLC		1		Hypodiploid ALL	SNV	missense		C164F
Zhang_2015	1120	SJRHB035	chr19	45281265	A	G	CBLC		1		Rhabdosarcoma	SNV	missense		Q26R
Zhang_2015	1120	SJINF016	chr9	5462929	G	A	CD274		1		Infant ALL	SNV	missense		E164K
Zhang_2015	1120	SJLGG010	chr9	5457109	A	T	CD274		1		Low Grade Glioma	SNV	missense		Y28F
Zhang_2015	1120	SJAMLM7004	chr19	42383249	C	T	CD79A		1		Acute megakaryoblastic leukemia	SNV	missense		T90M
Zhang_2015	1120	SJOS001117	chr19	42383249	C	T	CD79A		1		Osteosarcoma	SNV	missense		T90M
Zhang_2015	1120	SJBALL021333	chr3	48224442	C	T	CDC25A		1		ALL with alterations of ERG	SNV	missense		D136N
Zhang_2015	1120	SJBALL021405	chr3	48229329	C	A	CDC25A		1		ALL with alterations of ERG	SNV	missense		G37W
Zhang_2015	1120	SJERG020299	chr3	48225298	A	T	CDC25A		1		ALL with alterations of ERG	SNV	missense		S107T
Zhang_2015	1120	SJNBL017	chr3	48225303	A	G	CDC25A		1		Neuroblastoma	SNV	missense		I105T
Zhang_2015	1120	SJOS001120	chr3	48228210	G	C	CDC25A		1		Osteosarcoma	SNV	missense		S77C
Zhang_2015	1120	SJBALL195	chr8	57129085	T	C	CHCHD7		1		BALL	SNV	missense		F75L
Zhang_2015	1120	SJNBL159	chr2	175689174	C	G	CHN1		1		Neuroblastoma	SNV	missense		V208L
Zhang_2015	1120	SJERG025	chr16	11001672	G	A	CIITA		1		ALL with alterations of ERG	SNV	missense		G775R
Zhang_2015	1120	SJHYPER121	chr16	11001469	C	G	CIITA		1		Hyperdiploid ALL	SNV	missense		A707G
Zhang_2015	1120	SJINF020	chr16	10996535	T	A	CIITA		1		Infant ALL	SNV	missense		L217M
Zhang_2015	1120	SJNBL008	chr16	10992559	C	T	CIITA		1		Neuroblastoma	SNV	nonsense		Q110*
Zhang_2015	1120	SJLGG020	chr11	57428790	T	C	CLP1		1		Low Grade Glioma	SNV	missense		I387T
Zhang_2015	1120	SJMEL001001	chr11	57427477	G	A	CLP1		1		Melanoma	SNV	missense		G177S
Zhang_2015	1120	SJNBL024	chr11	57428528	C	T	CLP1		1		Neuroblastoma	SNV	missense		R236C
Zhang_2015	1120	SJOS007	chr11	57428528	C	T	CLP1		1		Osteosarcoma	SNV	missense		R236C
Zhang_2015	1120	SJHGG012	chr17	57744192	A	T	CLTC		1		High Grade Glioma	SNV	missense		E661V
Zhang_2015	1120	SJPHALL020035	chr17	57758727	G	A	CLTC		1		BCR-ABL1 ALL	SNV	missense		R1046H
Zhang_2015	1120	SJTALL065	chr17	57761297	C	G	CLTC		1		T-cell ALL	SNV	missense		S1462C
Zhang_2015	1120	SJBALL020383	chr22	19220022	C	T	CLTCL1		1		ALL with alterations of ERG	SNV	missense		E541K
Zhang_2015	1120	SJBALL020383	chr22	19220025	C	T	CLTCL1		1		ALL with alterations of ERG	SNV	missense		E540K
Zhang_2015	1120	SJCBF095	chr22	19241604	C	T	CLTCL1		1		Core binding factor AML	SNV	missense		E133K
Zhang_2015	1120	SJCBF121	chr22	19230452	C	G	CLTCL1		1		Core binding factor AML	SNV	missense		R176P
Zhang_2015	1120	SJCBF148	chr22	19175102	C	T	CLTCL1		1		Core binding factor AML	SNV	missense		V1525M
Zhang_2015	1120	SJE2A006	chr22	19188854	G	A	CLTCL1		1		B-Lineage ALL E2A-PBX1 Subtype	SNV	missense		R1251W
Zhang_2015	1120	SJE2A006	chr22	19188880	T	A	CLTCL1		1		B-Lineage ALL E2A-PBX1 Subtype	SNV	missense		D1242V
Zhang_2015	1120	SJE2A029	chr22	19188936	G	T	CLTCL1		1		B-Lineage ALL E2A-PBX1 Subtype	SNV	missense		N1223K
Zhang_2015	1120	SJEPD001544	chr22	19197910	C	T	CLTCL1		1		Ependymoma	SNV	missense		A1059T
Zhang_2015	1120	SJERG020051	chr22	19171021	A	G	CLTCL1		1		ALL with alterations of ERG	SNV	missense		L1570P
Zhang_2015	1120	SJHGG061	chr22	19178854	G	A	CLTCL1		1		High Grade Glioma	SNV	missense		R1429W
Zhang_2015	1120	SJMB040	chr22	19211535	T	C	CLTCL1		1		Medulloblastoma	SNV	missense		D724G
Zhang_2015	1120	SJNBL003	chr22	19220018	G	A	CLTCL1		1		Neuroblastoma	SNV	missense		P542L
Zhang_2015	1120	SJOS001109	chr22	19188987	G	T	CLTCL1		1		Osteosarcoma	SNV	nonsense		Y1206*
Zhang_2015	1120	SJTALL068	chr22	19209019	A	G	CLTCL1		1		T-cell ALL	SNV	missense		F893L
Zhang_2015	1120	SJE2A026	chr3	128890552	G	A	CNBP		1		B-Lineage ALL E2A-PBX1 Subtype	SNV	missense		R17W
Zhang_2015	1120	SJPHALL020040	chr3	128890524	C	T	CNBP		1		BCR-ABL1 ALL	SNV	missense		G26D
Zhang_2015	1120	SJBALL020649	chr17	48267734	C	T	COL1A1		1		PH-LIKE	SNV	missense		R802H
Zhang_2015	1120	SJCBF006	chr17	48276942	G	A	COL1A1		1		Core binding factor AML	SNV	missense		T103I
Zhang_2015	1120	SJEPD015	chr17	48270048	C	T	COL1A1		1		Ependymoma	SNV	missense		A628T
Zhang_2015	1120	SJERG013	chr17	48266365	G	T	COL1A1		1		ALL with alterations of ERG	SNV	missense		P982T
Zhang_2015	1120	SJETV074	chr17	48273298	C	T	COL1A1		1		ETV6-RUNX1 ALL	SNV	missense		A348T
Zhang_2015	1120	SJETV191	chr17	48266365	G	T	COL1A1		1		ETV6-RUNX1 ALL	SNV	missense		P982T
Zhang_2015	1120	SJHGG036	chr17	48266534	G	A	COL1A1		1		High Grade Glioma	SNV	missense		P978S
Zhang_2015	1120	SJHGG066	chr17	48262871	A	G	COL1A1		1		High Grade Glioma	SNV	missense		F1463L
Zhang_2015	1120	SJHGG080	chr17	48272643	G	C	COL1A1		1		High Grade Glioma	SNV	missense		P417A
Zhang_2015	1120	SJHYPO019	chr17	48264049	C	T	COL1A1		1		Hypodiploid ALL	SNV	missense		A1256T
Zhang_2015	1120	SJHYPO026	chr17	48262871	A	G	COL1A1		1		Hypodiploid ALL	SNV	missense		F1463L
Zhang_2015	1120	SJHYPO124	chr17	48275820	C	T	COL1A1		1		Hypodiploid ALL	SNV	missense		G173R
Zhang_2015	1120	SJMB037	chr17	48266838	C	T	COL1A1		1		Medulloblastoma	SNV	missense		R910H
Zhang_2015	1120	SJE2A066	chr2	208442243	G	A	CREB1		1		B-Lineage ALL E2A-PBX1 Subtype	SNV	missense		V249I
Zhang_2015	1120	SJACT003	chr11	46332723	C	G	CREB3L1		1		Adrenocortical Carcinoma	SNV	missense		L246V
Zhang_2015	1120	SJBALL020704	chr11	46331588	G	A	CREB3L1		1		PH-LIKE	SNV	missense		E189K
Zhang_2015	1120	SJEPD001507	chr11	46329402	C	G	CREB3L1		1		Ependymoma	SNV	missense		L123V
Zhang_2015	1120	SJETV083	chr11	46332723	C	G	CREB3L1		1		ETV6-RUNX1 ALL	SNV	missense		L246V
Zhang_2015	1120	SJHGG078	chr11	46321660	G	A	CREB3L1		1		High Grade Glioma	SNV	missense		D93N
Zhang_2015	1120	SJLGG003	chr11	46334175	G	A	CREB3L1		1		Low Grade Glioma	SNV	missense		E306K
Zhang_2015	1120	SJCBF108	chr7	137590537	C	T	CREB3L2		1		Core binding factor AML	SNV	missense		A276T
Zhang_2015	1120	SJE2A008	chr7	137590594	T	C	CREB3L2		1		B-Lineage ALL E2A-PBX1 Subtype	SNV	missense		K257E
Zhang_2015	1120	SJEWS001309	chr7	137570171	G	A	CREB3L2		1		Ewing's sarcoma	SNV	missense		T374M
Zhang_2015	1120	SJEWS010367	chr7	137600738	A	G	CREB3L2		1		Ewing's sarcoma	SNV	missense		W114R
Zhang_2015	1120	SJHGG067	chr7	137686406	G	A	CREB3L2		1		High Grade Glioma	SNV	missense		R16C
Zhang_2015	1120	SJHYPO126	chr7	137593098	C	T	CREB3L2		1		Hypodiploid ALL	SNV	missense		R223H
Zhang_2015	1120	SJNBL006	chr7	137590594	T	C	CREB3L2		1		Neuroblastoma	SNV	missense		K257E
Zhang_2015	1120	SJNBL019	chr7	137686426	T	C	CREB3L2		1		Neuroblastoma	SNV	missense		Q9R
Zhang_2015	1120	SJHYPER150	chr19	18870372	G	C	CRTC1		1		Hyperdiploid ALL	SNV	missense		R212S
Zhang_2015	1120	SJPHALL020033	chr19	18856705	C	T	CRTC1		1		BCR-ABL1 ALL	SNV	missense		R106W
Zhang_2015	1120	SJCBF140	chr15	91169160	G	A	CRTC3		1		Core binding factor AML	SNV	missense		S301N
Zhang_2015	1120	SJERG019	chr15	91185360	T	-	CRTC3		1		ALL with alterations of ERG	SNV	frameshift		A615fs
Zhang_2015	1120	SJOS001117	chr15	91147639	G	A	CRTC3		1		Osteosarcoma	SNV	missense		E146K
Zhang_2015	1120	SJPHALL020034	chr15	91184354	G	A	CRTC3		1		BCR-ABL1 ALL	SNV	missense		R525Q
Zhang_2015	1120	SJEPD031	chr12	57910635	C	T	DDIT3		1		Ependymoma	SNV	missense		R156H
Zhang_2015	1120	SJNBL166	chr12	57910845	C	T	DDIT3		1		Neuroblastoma	SNV	missense		S86N
Zhang_2015	1120	SJNBL179	chr12	57910636	G	A	DDIT3		1		Neuroblastoma	SNV	missense		R156C
Zhang_2015	1120	SJE2A023	chr11	108712161	T	G	DDX10		1		B-Lineage ALL E2A-PBX1 Subtype	SNV	missense		F735L
Zhang_2015	1120	SJETV004	chr11	108712161	T	G	DDX10		1		ETV6-RUNX1 ALL	SNV	missense		F735L
Zhang_2015	1120	SJHYPER104	chr11	108709186	C	T	DDX10		1		Hyperdiploid ALL	SNV	missense		S660F
Zhang_2015	1120	SJHYPO052	chr11	108550250	C	G	DDX10		1		Hypodiploid ALL	SNV	missense		P271A
Zhang_2015	1120	SJCBF112	chr17	62500186	G	A	DDX5		1		Core binding factor AML	SNV	missense		A119V
Zhang_2015	1120	SJERG017	chr17	62500829	T	A	DDX5		1		ALL with alterations of ERG	SNV	missense		Y59F
Zhang_2015	1120	SJACT022	chr12	51118613	C	T	DIP2B		1		Adrenocortical Carcinoma	SNV	missense		S1115F
Zhang_2015	1120	SJE2A061	chr12	51135274	T	A	DIP2B		1		B-Lineage ALL E2A-PBX1 Subtype	SNV	missense		I1477N
Zhang_2015	1120	SJERG020300	chr12	51117024	C	T	DIP2B		1		ALL with alterations of ERG	SNV	missense		A1069V
Zhang_2015	1120	SJHGG041	chr12	51086732	G	C	DIP2B		1		High Grade Glioma	SNV	splice		G552_E14splice
Zhang_2015	1120	SJINF021	chr12	51092867	A	G	DIP2B		1		Infant ALL	SNV	missense		K736R
Zhang_2015	1120	SJLGG011	chr12	51138390	A	G	DIP2B		1		Low Grade Glioma	SNV	missense		N1500S
Zhang_2015	1120	SJNBL136	chr12	51108374	A	C	DIP2B		1		Neuroblastoma	SNV	missense		Q949P
Zhang_2015	1120	SJOS001119	chr12	51117090	T	A	DIP2B		1		Osteosarcoma	SNV	missense		V1091D
Zhang_2015	1120	SJPHALL020042	chr12	51130882	C	A	DIP2B		1		BCR-ABL1 ALL	SNV	missense		H1389N
Zhang_2015	1120	SJTALL081	chr12	51126173	G	A	DIP2B		1		T-cell ALL	SNV	missense		V1279I
Zhang_2015	1120	SJERG020300	chr1	221913028	G	A	DUSP10		1		ALL with alterations of ERG	SNV	missense		P20L
Zhang_2015	1120	SJHYPER150	chr5	158223414	A	G	EBF1		1		Hyperdiploid ALL	SNV	missense		I283T
Zhang_2015	1120	SJAMLM7011	chr6	139202128	G	A	ECT2L		1		Acute megakaryoblastic leukemia	SNV	missense		R567Q
Zhang_2015	1120	SJBALL020635	chr6	139186307	G	T	ECT2L		1		BALL	SNV	missense		R489M
Zhang_2015	1120	SJERG018	chr6	139159577	T	G	ECT2L		1		ALL with alterations of ERG	SNV	missense		F90V
Zhang_2015	1120	SJETV092	chr6	139186246	A	G	ECT2L		1		ETV6-RUNX1 ALL	SNV	missense		K469E
Zhang_2015	1120	SJHYPO012	chr6	139189297	C	T	ECT2L		1		Hypodiploid ALL	SNV	missense		A511V
Zhang_2015	1120	SJLGG008	chr6	139183809	C	T	ECT2L		1		Low Grade Glioma	SNV	missense		T415M
Zhang_2015	1120	SJNBL135	chr6	139170553	G	T	ECT2L		1		Neuroblastoma	SNV	nonsense		E351*
Zhang_2015	1120	SJNBL161	chr6	139197638	G	A	ECT2L		1		Neuroblastoma	SNV	nonsense		W536*
Zhang_2015	1120	SJNBL167	chr6	139170558	C	G	ECT2L		1		Neuroblastoma	SNV	missense		I352M
Zhang_2015	1120	SJNBL186	chr6	139159610	G	A	ECT2L		1		Neuroblastoma	SNV	missense		A101T
Zhang_2015	1120	SJNBL191	chr6	139170553	G	T	ECT2L		1		Neuroblastoma	SNV	nonsense		E351*
Zhang_2015	1120	SJRB016	chr6	139223664	G	A	ECT2L		1		Retinoblastoma	SNV	missense		G872D
Zhang_2015	1120	SJRHB034	chr6	139222219	T	C	ECT2L		1		Rhabdosarcoma	SNV	missense		L850P
Zhang_2015	1120	SJTALL065	chr6	139167798	G	A	ECT2L		1		T-cell ALL	SNV	missense		R296Q
Zhang_2015	1120	SJEWS001315	chr8	117671183	T	C	EIF3H		1		Ewing's sarcoma	SNV	missense		H109R
Zhang_2015	1120	SJBALL201	chr19	856132	C	T	ELANE		1		BALL	SNV	missense		R258W
Zhang_2015	1120	SJHGG007	chr19	855708	G	A	ELANE		1		High Grade Glioma	SNV	missense		E171K
Zhang_2015	1120	SJHYPER113	chr19	855956	A	C	ELANE		1		Hyperdiploid ALL	SNV	splice		G200_E5splice
Zhang_2015	1120	SJNBL035	chr19	855997	C	T	ELANE		1		Neuroblastoma	SNV	missense		H213Y
Zhang_2015	1120	SJNBL168	chr19	853305	T	C	ELANE		1		Neuroblastoma	SNV	missense		S90P
Zhang_2015	1120	SJNBL187	chr19	856061	C	T	ELANE		1		Neuroblastoma	SNV	missense		P234L
Zhang_2015	1120	SJEPD001546	chrX	129200830	C	A	ELF4		1		Ependymoma	SNV	missense		G620C
Zhang_2015	1120	SJEWS010369	chrX	129201067	G	C	ELF4		1		Ewing's sarcoma	SNV	missense		L541V
Zhang_2015	1120	SJRHB022	chr1	205592984	C	A	ELK4		1		Rhabdosarcoma	SNV	missense		Q9H
Zhang_2015	1120	SJEWS001312	chr19	18576300	G	A	ELL		1		Ewing's sarcoma	SNV	missense		R131W
Zhang_2015	1120	SJHGG082	chr19	18576719	T	C	ELL		1		High Grade Glioma	SNV	missense		I65V
Zhang_2015	1120	SJHGG115	chr19	18569119	C	G	ELL		1		High Grade Glioma	SNV	missense		K255N
Zhang_2015	1120	SJHYPO026	chr19	18576719	T	C	ELL		1		Hypodiploid ALL	SNV	missense		I65V
Zhang_2015	1120	SJBALL013	chr7	73470628	GCATTCCTACTTACGGGGTTGGAG	-	ELN		1		BALL	SNV	proteinDel		G398_A406>A
Zhang_2015	1120	SJBALL063	chr7	73466278	C	T	ELN		1		PH-LIKE	SNV	missense		A310V
Zhang_2015	1120	SJEPD001532	chr7	73455584	G	A	ELN		1		Ependymoma	SNV	splice		G78_E5splice
Zhang_2015	1120	SJERG014	chr7	73462020	C	T	ELN		1		ALL with alterations of ERG	SNV	missense		P225L
Zhang_2015	1120	SJERG021891	chr7	73457316	G	A	ELN		1		ALL with alterations of ERG	SNV	missense		A110T
Zhang_2015	1120	SJEWS010371	chr7	73456970	T	C	ELN		1		Ewing's sarcoma	SNV	missense		F87L
Zhang_2015	1120	SJHGG005	chr7	73462008	G	T	ELN		1		High Grade Glioma	SNV	missense		G221V
Zhang_2015	1120	SJHGG041	chr7	73470642	G	T	ELN		1		High Grade Glioma	SNV	missense		G403W
Zhang_2015	1120	SJHYPO021	chr7	73442552	G	T	ELN		1		Hypodiploid ALL	SNV	missense		G12V
Zhang_2015	1120	SJHYPO047	chr7	73474499	G	T	ELN		1		Hypodiploid ALL	SNV	missense		A522S
Zhang_2015	1120	SJLGG027	chr7	73442552	G	T	ELN		1		Low Grade Glioma	SNV	missense		G12V
Zhang_2015	1120	SJLGG036	chr7	73466278	C	T	ELN		1		Low Grade Glioma	SNV	missense		A310V
Zhang_2015	1120	SJNBL158	chr7	73477660	G	A	ELN		1		Neuroblastoma	SNV	missense		A613T
Zhang_2015	1120	SJPHALL020042	chr7	73457316	G	A	ELN		1		BCR-ABL1 ALL	SNV	missense		A110T
Zhang_2015	1120	SJBALL021373	chr2	42557225	A	G	EML4		1		iAmp21 ALL	SNV	missense		S942G
Zhang_2015	1120	SJETV026	chr2	42522364	G	A	EML4		1		ETV6-RUNX1 ALL	SNV	missense		G440S
Zhang_2015	1120	SJMB004	chr2	42528504	A	G	EML4		1		Medulloblastoma	SNV	missense		H538R
Zhang_2015	1120	SJNBL171	chr2	42528410	G	C	EML4		1		Neuroblastoma	SNV	missense		A507P
Zhang_2015	1120	SJTALL081	chr2	42531654	A	G	EML4		1		T-cell ALL	SNV	missense		S644G
Zhang_2015	1120	SJBALL021898	chr1	51910695	A	G	EPS15		1		BALL	SNV	missense		C274R
Zhang_2015	1120	SJEPD009	chr1	51910578	T	C	EPS15		1		Ependymoma	SNV	missense		R313G
Zhang_2015	1120	SJERG020299	chr1	51912639	G	A	EPS15		1		ALL with alterations of ERG	SNV	missense		H264Y
Zhang_2015	1120	SJHGG086	chr1	51910628	C	T	EPS15		1		High Grade Glioma	SNV	missense		G296D
Zhang_2015	1120	SJHYPER062	chr1	51912756	T	C	EPS15		1		Hyperdiploid ALL	SNV	missense		K225E
Zhang_2015	1120	SJLGG029	chr1	51913741	C	G	EPS15		1		Low Grade Glioma	SNV	missense		V210L
Zhang_2015	1120	SJPHALL020040	chr1	51822497	T	C	EPS15		1		BCR-ABL1 ALL	SNV	missense		I856V
Zhang_2015	1120	SJPHALL020040	chr1	51946952	T	C	EPS15		1		BCR-ABL1 ALL	SNV	missense		Y23C
Zhang_2015	1120	SJCBF112	chr12	1192426	G	A	ERC1		1		Core binding factor AML	SNV	missense		E256K
Zhang_2015	1120	SJE2A023	chr12	1225080	G	A	ERC1		1		B-Lineage ALL E2A-PBX1 Subtype	SNV	missense		A456T
Zhang_2015	1120	SJEWS010371	chr12	1291111	A	T	ERC1		1		Ewing's sarcoma	SNV	missense		L604F
Zhang_2015	1120	SJNBL002	chr12	1192727	A	G	ERC1		1		Neuroblastoma	SNV	missense		E356G
Zhang_2015	1120	SJTALL068	chr12	1213965	C	G	ERC1		1		T-cell ALL	SNV	missense		A379G
Zhang_2015	1120	SJACT060	chr7	13935577	G	C	ETV1		1		Adrenocortical Carcinoma	SNV	missense		L450V
Zhang_2015	1120	SJMEL001001	chr7	13935499	C	T	ETV1		1		Melanoma	SNV	missense		V476M
Zhang_2015	1120	SJEPD001502	chr17	41611293	G	A	ETV4		1		Ependymoma	SNV	missense		P106L
Zhang_2015	1120	SJEPD027	chr17	41606892	T	C	ETV4		1		Ependymoma	SNV	missense		K370E
Zhang_2015	1120	SJEPD035	chr17	41622970	T	A	ETV4		1		Ependymoma	SNV	nonsense		K6*
Zhang_2015	1120	SJEWS010365	chr17	41611293	G	A	ETV4		1		Ewing's sarcoma	SNV	missense		P106L
Zhang_2015	1120	SJE2A029	chr3	185823104	C	G	ETV5		1		B-Lineage ALL E2A-PBX1 Subtype	SNV	missense		Q74H
Zhang_2015	1120	SJHGG081	chr3	185783745	G	T	ETV5		1		High Grade Glioma	SNV	missense		P256H
Zhang_2015	1120	SJHYPO041	chr3	185766480	A	G	ETV5		1		Hypodiploid ALL	SNV	missense		L494P
Zhang_2015	1120	SJINF010	chr3	185783706	G	A	ETV5		1		Infant ALL	SNV	missense		P269L
Zhang_2015	1120	SJNBL029	chr1	118165603	G	A	FAM46C		1		Neuroblastoma	SNV	missense		R38Q
Zhang_2015	1120	SJACT065	chrX	14862803	T	C	FANCB		1		Adrenocortical Carcinoma	SNV	missense		T663A
Zhang_2015	1120	SJETV085	chrX	14863011	A	C	FANCB		1		ETV6-RUNX1 ALL	SNV	missense		Y632D
Zhang_2015	1120	SJINF004	chrX	14877329	G	A	FANCB		1		Infant ALL	SNV	missense		T360M
Zhang_2015	1120	SJHYPER113	chr2	48066031	C	T	FBXO11		1		Hyperdiploid ALL	SNV	missense		R101H
Zhang_2015	1120	SJETV041	chr1	161647270	A	C	FCGR2B		1		ETV6-RUNX1 ALL	SNV	missense		E268A
Zhang_2015	1120	SJBALL020516	chr1	157556138	T	-	FCRL4		1		iAmp21 ALL	SNV	frameshift		T319fs
Zhang_2015	1120	SJCBF121	chr1	157557720	C	G	FCRL4		1		Core binding factor AML	SNV	missense		R166P
Zhang_2015	1120	SJE2A037	chr1	157551336	G	A	FCRL4		1		B-Lineage ALL E2A-PBX1 Subtype	SNV	missense		R412C
Zhang_2015	1120	SJETV068	chr1	157557721	G	A	FCRL4		1		ETV6-RUNX1 ALL	SNV	nonsense		R166*
Zhang_2015	1120	SJHGG014	chr1	157556120	G	A	FCRL4		1		High Grade Glioma	SNV	nonsense		R325*
Zhang_2015	1120	SJHYPER015	chr1	157557673	T	-	FCRL4		1		Hyperdiploid ALL	SNV	frameshift		K182fs
Zhang_2015	1120	SJMB003	chr1	157557110	C	T	FCRL4		1		Medulloblastoma	SNV	missense		G268D
Zhang_2015	1120	SJINF061	chr2	219848964	G	T	FEV		1		Infant ALL	SNV	missense		A39E
Zhang_2015	1120	SJERG020303	chr6	167424350	G	A	FGFR1OP		1		ALL with alterations of ERG	SNV	missense		G163E
Zhang_2015	1120	SJHGG010	chr6	167417266	T	G	FGFR1OP		1		High Grade Glioma	SNV	missense		F89L
Zhang_2015	1120	SJETV092	chr11	128628194	G	T	FLI1		1		ETV6-RUNX1 ALL	SNV	missense		R68L
Zhang_2015	1120	SJEWS001301	chr9	132740779	G	A	FNBP1		1		Ewing's sarcoma	SNV	missense		R104C
Zhang_2015	1120	SJHYPO145	chr9	132741623	CTT	-	FNBP1		1		Hypodiploid ALL	SNV	proteinDel		K57del
Zhang_2015	1120	SJNBL016	chr19	677882	G	T	FSTL3		1		Neuroblastoma	SNV	missense		G65V
Zhang_2015	1120	SJOS004	chr19	677869	T	C	FSTL3		1		Osteosarcoma	SNV	missense		C61R
Zhang_2015	1120	SJETV096	chr16	31195601	A	G	FUS		1		ETV6-RUNX1 ALL	SNV	missense		Y136C
Zhang_2015	1120	SJHGG019	chr16	31201719	C	T	FUS		1		High Grade Glioma	SNV	missense		P431L
Zhang_2015	1120	SJHGG019	chr16	31202410	G	T	FUS		1		High Grade Glioma	SNV	missense		G507V
Zhang_2015	1120	SJHGG019	chr16	31201719	C	T	FUS		1		High Grade Glioma	SNV	missense		P431L
Zhang_2015	1120	SJHGG019	chr16	31202410	G	T	FUS		1		High Grade Glioma	SNV	missense		G507V
Zhang_2015	1120	SJCBF009	chr17	42152723	G	A	G6PC3		1		Core binding factor AML	SNV	missense		R194Q
Zhang_2015	1120	SJCBF016	chr17	42153170	C	G	G6PC3		1		Core binding factor AML	SNV	missense		S267C
Zhang_2015	1120	SJEWS010423	chr17	42148502	G	A	G6PC3		1		Ewing's sarcoma	SNV	missense		V57M
Zhang_2015	1120	SJTALL216	chr17	42152820	G	A	G6PC3		1		T-cell ALL	SNV	nonsense		W226*
Zhang_2015	1120	SJCBF014	chr4	110745153	G	A	GAR1		1		Core binding factor AML	SNV	missense		G202R
Zhang_2015	1120	SJCBF042	chr4	110739220	G	A	GAR1		1		Core binding factor AML	SNV	missense		E115K
Zhang_2015	1120	SJEPD027	chr4	110739212	A	G	GAR1		1		Ependymoma	SNV	missense		K112R
Zhang_2015	1120	SJNBL024	chr4	110737486	G	A	GAR1		1		Neuroblastoma	SNV	missense		G56R
Zhang_2015	1120	SJHGG099	chr17	9923183	T	C	GAS7		1		High Grade Glioma	SNV	missense		E8G
Zhang_2015	1120	SJHYPER020	chr17	9862596	C	G	GAS7		1		Hyperdiploid ALL	SNV	missense		D10H
Zhang_2015	1120	SJACT065	chr3	155652757	C	G	GMPS		1		Adrenocortical Carcinoma	SNV	missense		P577A
Zhang_2015	1120	SJTALL002	chr3	155649647	C	T	GMPS		1		T-cell ALL	SNV	missense		R552C
Zhang_2015	1120	SJCBF098	chr14	93299609	G	A	GOLGA5		1		Core binding factor AML	SNV	missense		R621H
Zhang_2015	1120	SJE2A068	chr14	93305733	T	C	GOLGA5		1		B-Lineage ALL E2A-PBX1 Subtype	SNV	missense		M713T
Zhang_2015	1120	SJMB039	chr14	93275857	A	G	GOLGA5		1		Medulloblastoma	SNV	missense		K329E
Zhang_2015	1120	SJOS001111	chr14	93276676	C	T	GOLGA5		1		Osteosarcoma	SNV	missense		A357V
Zhang_2015	1120	SJE2A032	chr6	117896382	G	A	GOPC		1		B-Lineage ALL E2A-PBX1 Subtype	SNV	missense		A203V
Zhang_2015	1120	SJETV076	chr6	117923197	C	A	GOPC		1		ETV6-RUNX1 ALL	SNV	missense		Q85H
Zhang_2015	1120	SJHGG081	chr6	117890777	C	G	GOPC		1		High Grade Glioma	SNV	missense		R345S
Zhang_2015	1120	SJTALL007	chr6	117900203	C	T	GOPC		1		T-cell ALL	SNV	missense		E104K
Zhang_2015	1120	SJHYPO029	chr14	67610098	G	T	GPHN		1		Hypodiploid ALL	SNV	missense		A590S
Zhang_2015	1120	SJMB030	chr14	67579840	T	-	GPHN		1		Medulloblastoma	SNV	frameshift		V526fs
Zhang_2015	1120	SJNBL036	chr14	67610119	C	T	GPHN		1		Neuroblastoma	SNV	missense		R597C
Zhang_2015	1120	SJBALL020570	chr1	154245954	A	G	HAX1		1		iAmp21 ALL	SNV	missense		S66G
Zhang_2015	1120	SJE2A010	chr1	154246336	A	G	HAX1		1		B-Lineage ALL E2A-PBX1 Subtype	SNV	missense		S135G
Zhang_2015	1120	SJERG021891	chr1	154246361	G	C	HAX1		1		ALL with alterations of ERG	SNV	missense		G143A
Zhang_2015	1120	SJETV096	chr1	154246309	C	T	HAX1		1		ETV6-RUNX1 ALL	SNV	missense		R126W
Zhang_2015	1120	SJHGG057	chr1	154245849	G	-	HAX1		1		High Grade Glioma	SNV	frameshift		E31fs
Zhang_2015	1120	SJCBF137	chr16	56969322	C	T	HERPUD1		1		Core binding factor AML	SNV	missense		R79W
Zhang_2015	1120	SJPHALL010	chr16	56966220	C	G	HERPUD1		1		BCR-ABL1 ALL	SNV	missense		R22G
Zhang_2015	1120	SJBALL020984	chr7	75172221	C	T	HIP1		1		iAmp21 ALL	SNV	missense		A947T
Zhang_2015	1120	SJBALL021434	chr7	75189125	T	C	HIP1		1		ALL with alterations of ERG	SNV	missense		D429G
Zhang_2015	1120	SJE2A060	chr7	75192544	G	A	HIP1		1		B-Lineage ALL E2A-PBX1 Subtype	SNV	missense		S276F
Zhang_2015	1120	SJE2A064	chr7	75177068	A	G	HIP1		1		B-Lineage ALL E2A-PBX1 Subtype	SNV	missense		L817S
Zhang_2015	1120	SJEWS010371	chr7	75176242	C	T	HIP1		1		Ewing's sarcoma	SNV	missense		G852S
Zhang_2015	1120	SJHGG118	chr7	75177068	A	G	HIP1		1		High Grade Glioma	SNV	missense		L817S
Zhang_2015	1120	SJMB009	chr7	75221694	G	A	HIP1		1		Medulloblastoma	SNV	missense		P108L
Zhang_2015	1120	SJNBL164	chr7	75221832	G	A	HIP1		1		Neuroblastoma	SNV	missense		T62M
Zhang_2015	1120	SJTALL012	chr7	75171290	T	A	HIP1		1		T-cell ALL	SNV	missense		D967V
Zhang_2015	1120	SJBALL021901	chr6	27107337	G	A	HIST1H4I		1		BALL	SNV	missense		A84T
Zhang_2015	1120	SJACT071	chr17	53392608	C	T	HLF		1		Adrenocortical Carcinoma	SNV	missense		R158C
Zhang_2015	1120	SJEPD001527	chr17	53392609	G	A	HLF		1		Ependymoma	SNV	missense		R158H
Zhang_2015	1120	SJNBL045	chr17	53392728	C	T	HLF		1		Neuroblastoma	SNV	missense		R198C
Zhang_2015	1120	SJNBL124	chr12	66345187	C	G	HMGA2		1		Neuroblastoma	SNV	missense		P92A
Zhang_2015	1120	SJTALL003	chr12	66345187	C	G	HMGA2		1		T-cell ALL	SNV	missense		P92A
Zhang_2015	1120	SJETV096	chr8	42798495	G	A	HOOK3		1		ETV6-RUNX1 ALL	SNV	missense		V103M
Zhang_2015	1120	SJHGG060	chr8	42837808	C	A	HOOK3		1		High Grade Glioma	SNV	missense		L454I
Zhang_2015	1120	SJHGG112	chr8	42814435	G	T	HOOK3		1		High Grade Glioma	SNV	missense		R198I
Zhang_2015	1120	SJE2A032	chr7	27222599	A	G	HOXA11		1		B-Lineage ALL E2A-PBX1 Subtype	SNV	missense		I253T
Zhang_2015	1120	SJEPD005	chr7	27224368	C	G	HOXA11		1		Ependymoma	SNV	missense		R132S
Zhang_2015	1120	SJNBL187	chr7	27224454	C	G	HOXA11		1		Neuroblastoma	SNV	missense		G104R
Zhang_2015	1120	SJRHB046	chr7	27224612	A	T	HOXA11		1		Rhabdosarcoma	SNV	missense		L51Q
Zhang_2015	1120	SJAMLM7066	chr7	27238951	T	A	HOXA13		1		Acute megakaryoblastic leukemia	SNV	missense		Y249F
Zhang_2015	1120	SJCBF035	chr7	27239672	G	A	HOXA13		1		Core binding factor AML	SNV	missense		P9S
Zhang_2015	1120	SJNBL014	chr7	27238775	C	T	HOXA13		1		Neuroblastoma	SNV	missense		D308N
[truncated: 725 more rows]

## Sheet: Parsons_2016
study_year	total_n	ID	chr	pos	ref	alt	gene	classification	var_n	diagnosis_group	diagnosis_type	SNV_SV	ontology	c.HGVS	p.HGVS
Parsons_2016	150	223202					WT1	P	1		Wilms tumor	SNV	frameshift	c.865_867delinsAA	p.Y289fs
Parsons_2016	150	906824					DICER1	P	1		Pulmonary pleuroblastoma	SNV	nonsense	c.2062C>T	p.R688X
Parsons_2016	150	933667					VHL	P	1		Pheochromocytoma	SNV	missense	c.499C>T	p.R167W
Parsons_2016	150	1067068					VHL	P	1		Pheochromocytoma	SNV	missense	c.499C>T	p.R167W
Parsons_2016	150	112016					MSH2	P	1		Glioblastoma	SNV	frameshift	c.1697delA	p.K566fs
Parsons_2016	150	19125					TP53	P	1		Neuroblastoma	SNV	missense	c.743G>A	p.R248Q
Parsons_2016	150	288486					TP53	PP	1		Adrenocortical carcinoma	SNV	missense	c.470T>C	p.V157A
Parsons_2016	150	1422737					KRAS	PP	1		Plexiform neurofibroma	SNV	missense	c.194G>T	p.S65I
Parsons_2016	150	1193543					SMARCA4	P	1		Neuroblastoma	SNV	frameshift	c.1156_1157del	p.E386fs
Parsons_2016	150	176688					BRCA1	P	1		Neuroblastoma	SNV	frameshift	c.68_69delAG	p.E23fs
Parsons_2016	150	1185828					BRCA1	P	1		Anaplastic medulloblastoma	SNV	frameshift	c.697_698del	p.V233fs
Parsons_2016	150	364059					BRCA2	P	1		Ewing sarcoma	SNV	frameshift	c.1278delA	p.D427fs
Parsons_2016	150	1077445					CHEK2	P	1		Wilms tumor	SNV	frameshift	c.1100delC	p.T367fs
Parsons_2016	150	866938					TJP2b	P	1		Hepatocellular carcinoma	SNV	frameshift	c.817delG	p.A273fs
Parsons_2016	150	914374					CLCN5	P	1		Ependymoma	SNV	nonsense	c.1466G>A	p.W489X

## Sheet: Mody_2016
study_year	total_n	ID	chr	pos	ref	alt	gene	classification	var_n	diagnosis_group	diagnosis_type	SNV_SV	ontology	c.HGVS	p.HGVS
Mody_2016	102	15					HOXB13	P	1		Wilms tumor	SNV	missense		G84E
Mody_2016	102	20					JAG1	P	1		HCC	SNV	missense		C693Y
Mody_2016	102	21					BAP1	P	1		Melanoma	SNV	nonsense		D567X
Mody_2016	102	22					SBDS	P	1		AML	SNV	frameshift		P6fs
Mody_2016	102	22					SBDS	P	1		AML	SNV	splice		exon2
Mody_2016	102	23					BARD1	P	1		NBL	SNV	frameshift		E139fs
Mody_2016	102	58					DICER1	P	1		PPB	SNV	nonsense		E1788X
Mody_2016	102	70					SMARCA4	P	1		Ovarian Small Cell Carcinoma	SNV	nonsense		R979X
Mody_2016	102	86					PDGFRB	P	1		IMFM	SNV	missense		R561C
Mody_2016	102	93					MITF	P	1		Omental mass, Panniculitis	SNV	missense		E318K
Mody_2016	102	93					GJB1	P	1		Omental mass, Panniculitis	SNV	missense		C179Y
Mody_2016	102	94					TP53	P	1		Embryonal RMS	SNV	nonsense		Y236X
Mody_2016	102	95					SMARCA4	P	1		Ovarian Small Cell Carcinoma	SNV	frameshift		Q415fs

## Sheet: Oberg_2016
study_year	total_n	ID	chr	pos	ref	alt	gene	classification	var_n	diagnosis_group	diagnosis_type	SNV_SV	ontology	c.HGVS	p.HGVS
Oberg_2016	101	14-19751					MLL2	P	1		HLH	SNV	frameshift	c.11640_11640delG; c.15631G > A	p.M3881Cfs*9 (de novo); p.E5211K
Oberg_2016	101	15-90485					C1QA	P			HLH		nonsense	c.622C > T	p.Gln208Ter
Oberg_2016	101	15-33031					GATA2	P			MDS		frameshift	c.16delG	p.(E6fs)
Oberg_2016	101	14-92247					PMS2	P			ALL		missense	c.1376C > G	p.S459X
Oberg_2016	101	15-46877					XIAP	P			HLH		Missense	c.1328G > C	p.R443P
Oberg_2016	101	14-19750					RUNX1	P			AML		splice	c.806-2A > G	r.Spl?
Oberg_2016	101	14-56374					APC	P			Hepatoblastoma		nonsense	c.3340C > T	p.R1114
Oberg_2016	101	15-33544					APC	P			Poorly differentiated carcinoma with focal neuroendocrine differentiation		frameshift	c.4660_4661insA	p.E1554fs
Oberg_2016	101	15-35162					RB1	P			Osteosarcoma		splice	c.1216-3A > G	p.?
Oberg_2016	101	15-44470					ATM	P			Medulloblastoma		Missense	c.566G > A	p.R189K
Oberg_2016	101	15-44470					ATM	P			Medulloblastoma		nonsense	c.8266A > T	p.K2756*
Oberg_2016	101	15-78886a					UGT1A1	P			Pineoblastoma		Homozygous	*28 allele (“(TA)7TAA”)
Oberg_2016	101	15-78886a					DICER1	P			Pineoblastoma		frameshift	c.4807dupC	p.L1603Pfs
Oberg_2016	101	15-17264					UGT1A1	P			Hepatocellular carcinoma		Heterozygous	*28 allele
Oberg_2016	101	15-29224					TP53	P			AML		missense	c. 644G > A	p.S215N
Oberg_2016	101	14-59462					BRCA1	P			Nested stromal epithelial tumor of the liver		frameshift	c.68._69delAG	p.Glu23Valfs
Oberg_2016	101	16-88073					BRCA1	P			Ependymoma		frameshift	c.5587_5594delGTAGCACT	p.V1863Lfs*35
Oberg_2016	101	14-75899					RYR1	P			Neuroblastoma		missense	c.6838G > A	p.V2280I
Oberg_2016	101	14-13487					TNNT2	P			Osteosarcoma		missense	c.422G > A	p.Arg141Gln
Oberg_2016	101	15-34296					VHL	P			Ependymoma		missense	c.539 T > C	p.I180T

## Sheet: Grobner_2018
study_year	total_n	ID	chr	pos	ref	alt	gene	classification	var_n	diagnosis_group	diagnosis_type	SNV_SV	ontology	c.HGVS	p.HGVS
Grobner_2018	914	NB-S-588	2	29432664			ALK	pathogenic	1		NB	SNV	nonsynonymous SNV
Grobner_2018	914	ICGC_GBM56	2	47702265			MSH2	pathogenic			HGGother	SNV	stopgain
Grobner_2018	914	SJOS007	2	47703538			MSH2	pathogenic			OS	SNV	stopgain
Grobner_2018	914	ICGC_GBM6	2	48028225			MSH6	pathogenic			HGGother	SNV	stopgain
Grobner_2018	914	ICGC_GBM67	2	48027886			MSH6	pathogenic			HGGother	SNV	stopgain
Grobner_2018	914	ICGC_GBM15	2	48030588			MSH6	pathogenic			HGGother	SNV	stopgain
Grobner_2018	914	ICGC_PA132_convey	17	29676142			NF1	pathogenic			PA	SNV	stopgain
Grobner_2018	914	SJHGG034	17	29654857			NF1	pathogenic			HGGother	SNV	nonsynonymous SNV
Grobner_2018	914	SJHGG089	17	29528489			NF1	pathogenic			HGGother	SNV	stopgain
Grobner_2018	914	SJHGG111	7	6026469			PMS2	pathogenic			HGGother	SNV	stopgain
Grobner_2018	914	SJHGG003	7	6026469			PMS2	pathogenic			HGGother	SNV	stopgain
Grobner_2018	914	RB_E_044	13	48947629			RB1	pathogenic			RB	SNV	splice
Grobner_2018	914	H049-72FV	22	24145582			SMARCB1	pathogenic			ATRT	SNV	stopgain
Grobner_2018	914	H049-9PNE	22	24133990			SMARCB1	pathogenic			ATRT	SNV	stopgain
Grobner_2018	914	H049-CELK	22	24159018			SMARCB1	pathogenic			ATRT	Indel	stopgain
Grobner_2018	914	ICGC_GBM19	17	7578406			TP53	pathogenic			HGGother	SNV	nonsynonymous SNV
Grobner_2018	914	ICGC_GBM28	17	7577114			TP53	pathogenic			HGGother	SNV	nonsynonymous SNV
Grobner_2018	914	ICGC_GBM32	17	7577538			TP53	pathogenic			HGGother	SNV	nonsynonymous SNV
Grobner_2018	914	ICGC_GBM56	17	7577538			TP53	pathogenic			HGGother	SNV	nonsynonymous SNV
Grobner_2018	914	ICGC_LFS_MB1	17	7577539			TP53	pathogenic			MB_SHH	SNV	nonsynonymous SNV
Grobner_2018	914	ICGC_LFS_MB2	17	7578406			TP53	pathogenic			MB_SHH	SNV	nonsynonymous SNV
Grobner_2018	914	ICGC_MB137	17	7577538			TP53	pathogenic			MB_SHH	SNV	nonsynonymous SNV
Grobner_2018	914	ICGC_MB145	17	7577085			TP53	pathogenic			MB_SHH	SNV	nonsynonymous SNV
Grobner_2018	914	ICGC_MB243	17	7578212			TP53	pathogenic			MB_SHH	SNV	stopgain
Grobner_2018	914	NB-S-549	17	7577550			TP53	pathogenic			NB	SNV	nonsynonymous SNV
Grobner_2018	914	SJACT002	17	7578211			TP53	pathogenic			ACC	SNV	nonsynonymous SNV
Grobner_2018	914	SJACT005	17	7577121			TP53	pathogenic			ACC	SNV	nonsynonymous SNV
Grobner_2018	914	SJACT008	17	7577548			TP53	pathogenic			ACC	SNV	nonsynonymous SNV
Grobner_2018	914	SJHGG028	17	7578263			TP53	pathogenic			HGGother	SNV	stopgain
Grobner_2018	914	SJHYPO119	17	7577120			TP53	pathogenic			B-ALL-HYPO	SNV	nonsynonymous SNV
Grobner_2018	914	SJRHB003	17	7578406			TP53	pathogenic			RMS	SNV	nonsynonymous SNV
Grobner_2018	914	OS_STU_005	17	7577086			TP53	pathogenic			OS	Indel	frameshift deletion
Grobner_2018	914	SJACT007	17	7579312			TP53	pathogenic			ACC	SNV	synonymous SNV
Grobner_2018	914	ICGC_PA5	.	.			NF1	pathogenic			PA	Deletion	.
Grobner_2018	914	RB_E_021	.	.			RB1	pathogenic			RB	Deletion	.
Grobner_2018	914	ICGC_MB206	.	.			SUFU	pathogenic			MB_SHH	Deletion	.
Grobner_2018	914	SJHYPO052	.	.			TP53	pathogenic			B-ALL-HYPO	Deletion	.
Grobner_2018	914	HP_LMU_KAP794	5	112175100			APC	likely pathogenic			HB	Indel	frameshift insertion
Grobner_2018	914	ICGC_MB122	5	112174625			APC	likely pathogenic			MB_WNT	Indel	frameshift deletion
Grobner_2018	914	ICGC_PA42	13	32911557			BRCA2	likely pathogenic			PA	Indel	frameshift insertion
Grobner_2018	914	SJMB012	13	32890556			BRCA2	likely pathogenic			MB_SHH	Indel	.
Grobner_2018	914	SJMB012	13	32929209			BRCA2	likely pathogenic			MB_SHH	Indel	frameshift deletion
Grobner_2018	914	SJHGG066	13	32912337			BRCA2	likely pathogenic			HGG_K27M	Indel	frameshift deletion
Grobner_2018	914	SJMB039	13	32953932			BRCA2	likely pathogenic			MB_Group3	SNV	stopgain
Grobner_2018	914	SJRHB010	13	32911677			BRCA2	likely pathogenic			RMS	Indel	frameshift deletion
Grobner_2018	914	SJHYPO021	13	32913365			BRCA2	likely pathogenic			B-ALLother	Indel	frameshift deletion
Grobner_2018	914	4182393	22	29091856			CHEK2	likely pathogenic			BL	Indel	frameshift deletion
Grobner_2018	914	RB_E_025	22	21343948			LZTR1	likely pathogenic			RB	SNV	stopgain
Grobner_2018	914	SJHGG086	22	21349014			LZTR1	likely pathogenic			HGGother	Indel	frameshift deletion
Grobner_2018	914	SJHYPO056	22	21343948			LZTR1	likely pathogenic			B-ALL-HYPO	SNV	stopgain
Grobner_2018	914	SJNBL024	22	21341827			LZTR1	likely pathogenic			NB	Indel	stopgain
Grobner_2018	914	ICGC_GBM6	2	48030684			MSH6	likely pathogenic			HGGother	Indel	frameshift deletion
Grobner_2018	914	ICGC_GBM67	2	48010384			MSH6	likely pathogenic			HGGother	Indel	frameshift deletion
Grobner_2018	914	SJHGG034	2	48026756			MSH6	likely pathogenic			HGGother	Indel	frameshift deletion
Grobner_2018	914	4127766	17	29557285			NF1	likely pathogenic			BL	SNV	nonsynonymous SNV
Grobner_2018	914	ICGC_PA143	17	29585424			NF1	likely pathogenic			PA	Indel	frameshift deletion
Grobner_2018	914	RH_HD_004	17	29422374			NF1	likely pathogenic			RMS	SNV	nonsynonymous SNV
Grobner_2018	914	ICGC_MB289	22	30077554			NF2	likely pathogenic			MB_Group4	Indel	frameshift deletion
Grobner_2018	914	SJHGG111	7	6027156			PMS2	likely pathogenic			HGGother	Indel	frameshift insertion
Grobner_2018	914	ICGC_MB193	9	98232215			PTCH1	likely pathogenic			MB_SHH	SNV	splice
Grobner_2018	914	RB_E_030	13	49039224			RB1	likely pathogenic			RB	Indel	frameshift insertion
Grobner_2018	914	RB_E_033	13	48954342			RB1	likely pathogenic			RB	SNV	nonsynonymous SNV
Grobner_2018	914	RB_E_040	13	49037876			RB1	likely pathogenic			RB	SNV	nonsynonymous SNV
Grobner_2018	914	ICGC_MB8	5	235293			SDHA	likely pathogenic			MB_Group4	SNV	stopgain
Grobner_2018	914	SJNBL034	1	17371320			SDHB	likely pathogenic			NB	SNV	nonsynonymous SNV
Grobner_2018	914	ICGC_MB295	10	104263931			SUFU	likely pathogenic			MB_Group4	Indel	frameshift deletion
Grobner_2018	914	OS_STU_013	17	7577143			TP53	likely pathogenic			OS	Indel	nonframeshift deletion
Grobner_2018	914	SJHGG010324	17	7578383			TP53	likely pathogenic			HGG_K27M	Indel	nonframeshift deletion
Grobner_2018	914	SJHGG047	17	7576846			TP53	likely pathogenic			HGG_K27M	Indel	frameshift deletion
Grobner_2018	914	SJHYPO051	17	7579355			TP53	likely pathogenic			B-ALL-HYPO	Indel	frameshift deletion
Grobner_2018	914	SJHYPO120	17	7577098			TP53	likely pathogenic			B-ALL-HYPO	SNV	nonsynonymous SNV
Grobner_2018	914	SJHYPO004	17	7579540			TP53	likely pathogenic			B-ALL-HYPO	Indel	frameshift deletion
Grobner_2018	914	ICGC_GBM17	16	2120559			TSC2	likely pathogenic			HGG_K27M	SNV	nonsynonymous SNV
Grobner_2018	914	ICGC_PA36	16	2120559			TSC2	likely pathogenic			PA	SNV	nonsynonymous SNV
Grobner_2018	914	ICGC_MB242	3	10191605			VHL	likely pathogenic			MB_WNT	SNV	nonsynonymous SNV
Grobner_2018	914	SJHGG047	3	10191605			VHL	likely pathogenic			HGG_K27M	SNV	nonsynonymous SNV

## Sheet: Wong_2020
study_year	total_n	ID	chr	pos	ref	alt	gene	classification	var_n	diagnosis_group	diagnosis_type	SNV_SV	ontology	c.HGVS	p.HGVS
Wong_2020	247	zcc5	22	29091121	C	CT	CHEK2	C5: Pathogenic	1	NBL	NBL	SNV	frameshift_variant		p.Glu457ArgfsTer33
Wong_2020	247	zcc5	22	29091856	AG	A	CHEK2	C5: Pathogenic		NBL	NBL	SNV	frameshift_variant		p.Thr367MetfsTer15
Wong_2020	247	zcc5	3	142266741	TTC	T	ATR	C4: Likely pathogenic		NBL	NBL	SNV	frameshift_variant		p.Glu1061AsnfsTer2
Wong_2020	247	zcc10	7	6035164	C	G	PMS2	C5: Pathogenic		MB	MB	SNV	splice_donor_variant		c.903+1G>C
Wong_2020	247	zcc10	7	6037018	TAGGGGG	TCTTCACACACA	PMS2	C5: Pathogenic		MB	MB	SNV	frameshift_variant		p.Pro246_Pro247delinsCysValTer
Wong_2020	247	zcc15	2	39250272	C	T	SOS1	C5: Pathogenic		Sarcoma	Sarcoma other	SNV	missense_variant		p.Glu433Lys
Wong_2020	247	zcc24	16	23652477	A	G	PALB2	C4: Likely pathogenic		DMG	DMG	SNV	start_lost		p.Met1?
Wong_2020	247	zcc28	22	29091856	AG	A	CHEK2	C5: Pathogenic		Rhabdoid	Rhabdoid MRT	SNV	frameshift_variant		p.Thr367MetfsTer15
Wong_2020	247	zcc28	22	24133967	C	T	SMARCB1	C5: Pathogenic		Rhabdoid	Rhabdoid MRT	SNV	stop_gained		p.Arg40Ter
Wong_2020	247	zcc33	17	29550585	G	A	NF1	C4: Likely pathogenic		Leukaemia	BALL	SNV	splice_region_variant		p.Lys615=
Wong_2020	247	zcc44	13	32914437	GT	G	BRCA2	C5: Pathogenic		Other	Solid other	SNV	frameshift_variant		p.Ser1982ArgfsTer22
Wong_2020	247	zcc50	17	38788573	GA	G	SMARCE1	C5: Pathogenic		CNS other	CNS other	SNV	frameshift_variant		p.Phe196SerfsTer39
Wong_2020	247	zcc52	1	45797228	C	T	MUTYH	C5: Pathogenic		CNS other	CNS other	SNV	missense_variant		p.Gly396Asp
Wong_2020	247	zcc53	1	45797228	C	T	MUTYH	C5: Pathogenic		Sarcoma	Sarcoma other	SNV	missense_variant		p.Gly396Asp
Wong_2020	247	zcc54	17	56801410	G	A	RAD51C	C5: Pathogenic		Sarcoma	RMS FP	SNV	stop_gained		p.Trp305Ter
Wong_2020	247	zcc60	17	29556060	C	CA	NF1	C5: Pathogenic		Sarcoma	MPNST	SNV	frameshift_variant		p.Thr811AspfsTer4
Wong_2020	247	zcc75	22	29121242	G	A	CHEK2	C4: Likely pathogenic		Sarcoma	EWS	SNV	missense_variant		p.Arg145Trp
Wong_2020	247	zcc79	2	47656951	C	T	MSH2	C5: Pathogenic		CNS embryonal	CNS embryonal	SNV	stop_gained		p.Arg383Ter
Wong_2020	247	zcc79	22	29130652	G	A	CHEK2	C4: Likely pathogenic		CNS embryonal	CNS embryonal	SNV	stop_gained		p.Gln20Ter
Wong_2020	247	zcc92	13	32971075	T	TA	BRCA2	C4: Likely pathogenic		DMG	DMG	SNV	frameshift_variant		p.Met3181IlefsTer8
Wong_2020	247	zcc92	3	10115047	G	A	FANCD2	C4: Likely pathogenic		DMG	DMG	SNV	splice_donor_variant		c.2715+1G>A
Wong_2020	247	zcc100	13	32914401	C	A	BRCA2	C5: Pathogenic		DMG	DMG	SNV	stop_gained		p.Ser1970Ter
Wong_2020	247	zcc113	19	11098396	C	T	SMARCA4	C3: Unknown pathogenicity		Rhabdoid	Rhabdoid MRT	SNV	missense_variant		p.Pro305Leu
Wong_2020	247	zcc113	19	11145808	G	C	SMARCA4	C4: Likely pathogenic		Rhabdoid	Rhabdoid MRT	SNV	missense_variant		p.Lys1390Asn
Wong_2020	247	zcc116	5	112175390	C	T	APC	C4: Likely pathogenic		HGG	HGG	SNV	stop_gained		p.Gln1367Ter
Wong_2020	247	zcc117	13	32913558	C	CA	BRCA2	C5: Pathogenic		NBL	NBL	SNV	frameshift_variant		p.Trp1692MetfsTer3
Wong_2020	247	zcc122	5	156533787	T	C	HAVCR2	C5: Pathogenic		Lymphoma	Lymphoma	SNV	missense_variant		p.Tyr82Cys
Wong_2020	247	zcc123	11	108115639	CT	C	ATM	C5: Pathogenic		Lymphoma	Lymphoma	SNV	frameshift_variant		p.Tyr264IlefsTer12
Wong_2020	247	zcc144	17	29654716	C	CT	NF1	C5: Pathogenic		Sarcoma	MPNST	SNV	frameshift_variant		p.Ile1803TyrfsTer38
Wong_2020	247	zcc145	11	32421541	C	T	WT1	C4: Likely pathogenic		Other	WT	SNV	missense_variant		p.Gly351Arg
Wong_2020	247	zcc151	7	50358698	G	A	IKZF1	C4: Likely pathogenic		Leukaemia	BALL	SNV	splice_donor_variant		c.40+1G>A
Wong_2020	247	zcc157	22	29091856	AG	A	CHEK2	C5: Pathogenic		Leukaemia	AML	SNV	frameshift_variant		p.Thr367MetfsTer15
Wong_2020	247	zcc159	22	29091856	AG	A	CHEK2	C4: Likely pathogenic		NBL	NBL	SNV	frameshift_variant		p.Thr367MetfsTer15
Wong_2020	247	zcc161	22	24167450	G	GT	SMARCB1	C4: Likely pathogenic		Rhabdoid	Rhabdoid MRT	SNV	frameshift_variant		p.Glu280Ter
Wong_2020	247	zcc164	16	89851262	G	G	FANCA	C5: Pathogenic		Leukaemia	AML	SNV	missense_variant		p.Gln490His
Wong_2020	247	zcc173	11	108151895	G	A	ATM	C4: Likely pathogenic		Leukaemia	AML	SNV	splice_region_variant		p.Lys1192=
Wong_2020	247	zcc189	7	6022516	C	T	PMS2	C5: Pathogenic		HGG	HGG	SNV	missense_variant		p.Glu705Lys
Wong_2020	247	zcc199	17	46805705	C	T	HOXB13	C4: Likely pathogenic		NBL	NBL	SNV	missense_variant		p.Gly84Glu
Wong_2020	247	zcc208	7	6031643	G	A	PMS2	C5: Pathogenic		HGG	HGG	SNV	stop_gained		p.Gln317Ter
Wong_2020	247	zcc236	2	47641560	A	T	MSH2	C5: Pathogenic		HGG	HGG	SNV	splice_region_variant,intron_variant		c.942+3A>T
Wong_2020	247	zcc241	16	23641191	G	GAGCAAGTTGGGGTGTGC	PALB2	C5: Pathogenic		DMG	DMG	SNV	frameshift_variant		p.His762AlafsTer8
Wong_2020	247	zcc243	22	21348971	GGTTGTGTGCGAGA	G	LZTR1	C5: Pathogenic		Sarcoma	Sarcoma other	SNV	frameshift_variant		p.Val582ProfsTer6
Wong_2020	247	zcc15	1	17379001		17381000	SDHB			Sarcoma	Sarcoma other	SV	deletion
Wong_2020	247	zcc103	22	23774001		24274000	SMARCB1			Rhabdoid	Rhabdoid ATRT	SV	deletion
Wong_2020	247	zcc231	2	47986001		48022000	MSH6			HGG	HGG	SV	deletion
Wong_2020	247	zcc36	22	19913001		51304566	SMARCB1			Rhabdoid	Rhabdoid MRT	SV	deletion
Wong_2020	247	zcc168	22	19389001		35241441	SMARCB1			Rhabdoid	Rhabdoid MRT	SV	duplication
Wong_2020	247	zcc41	1	17350193		17350553	SDHB			Sarcoma	Sarcoma other	SV	deletion
Wong_2020	247	zcc164	16	74086371		90354753	FANCA			Leukaemia	AML	SV	deletion
Wong_2020	247	zcc208	7	6021129		6023032	PMS2			HGG	HGG	SV	duplication

[truncated: 26 more sheets: Byrjalsen_2020, Fiala_2021, Newmann_2021, Stedingk_2021, Wagener_2021, Zhang_2015_genes, Parsons_2016_genes, Mody_2016_genes, Oberg_2016_genes, Grobner_2018_genes, Wong_2020_genes, Byrjalsen_2020_genes, Fiala_2021_genes, Newmann_2021_genes, Stedingk_2021_genes, Wagener_2021_genes, ELP1_gnomad_LoFs, ELP1_Waszak_2020, GPR161_gnomad_pLoF, GPR161_Begemann_2020 …]
